# Supplementary material for: Asymmetric synthesis of benzothiazolopyrimidines with high catalytic efficiency and stereoselectivity under bifunctional phosphonium salt systems
Source: Royal Society of Chemistry journal article supplement (doi:10.1039/d0cc04820h), 2020-01-01

SUPPORTING INFORMATION

**Asymmetric Synthesis of Benzothiazolopyrimidines with  
High Catalytic Efficiency and Stereoselectivity under  
Bifunctional Phosphonium Salt System**

Dongming Lu,<sup>a</sup> Jia-Hong Wu,<sup>a</sup> Jianke Pan,<sup>a</sup> Xue Chen,<sup>a</sup> Xiaoyu Ren,<sup>a</sup> and  
Tianli Wang<sup>\*,a</sup>

<sup>a</sup> Key Laboratory of Green Chemistry & Technology of Ministry of Education,  
College of Chemistry, Sichuan University 29 Wangjiang Road, Chengdu 610064 P.  
R. China.

E-mail: [wangtl@scu.edu.cn](mailto:wangtl@scu.edu.cn)

|                                                                           |    |
|---------------------------------------------------------------------------|----|
| <b>1. General Information</b> .....                                       | 2  |
| <b>2. Optimization of Reaction Conditions</b> .....                       | 3  |
| <b>3. Preparation of the Catalysts</b> .....                              | 4  |
| <b>4. General Procedure for the Synthesis of Substrates</b> .....         | 8  |
| <b>5. General Procedure for the Asymmetric Synthesis of 3 and 4.</b> .... | 10 |
| <b>6. Scale-up Synthesis and Synthetic Elaboration of Product</b> .....   | 43 |
| <b>7. Mechanistic Studies and Proposed Mechanism</b> .....                | 44 |
| <b>8. Crystal Structure of Product 4e.</b> .....                          | 46 |
| <b>9. Reference</b> .....                                                 | 48 |
| <b>10. NMR Spectra</b> .....                                              | 49 |

## 1. General Information

All the starting materials were obtained from commercial sources and used without further purification unless otherwise stated.  $^1\text{H}$ ,  $^{13}\text{C}$  and  $^{31}\text{P}$  NMR spectra were recorded in  $\text{CDCl}_3$ ,  $\text{CD}_3\text{OD}$  or  $\text{DMSO}-d_6$  on a Bruker Avance 400 spectrometer. Chemical shifts ( $\delta$ ) were given in parts per million (ppm). Multiplicity was indicated as follows: s (singlet), d (doublet), t (triplet), q (quartet), m (multiplet), dd (doublet of doublet), br s (broad singlet). Coupling constants ( $J$ ) were reported in Hertz (Hz). All high resolution mass spectra were obtained on a Thermo LTQ mass spectrometer. For thin layer chromatography (TLC), Merck pre-coated TLC plates (Merck 60 F254) were used, and compounds were visualized with a UV light at 254 nm. Flash chromatographic separations were performed on Merck 60 (0.040-0.063 mm) mesh silica gel. Enantiomeric excess was determined by HPLC analysis using chiral column described below in detail. Optical rotations were measured with polarimeter. The absolute configurations of the [4 + 2] cyclization products were assigned on the basis of X-ray crystallographic analysis of the single crystal of compound **4e**.

All phosphonium salt catalysts used in this study were prepared via a P-alkylation reaction of our previously reported organophosphines according to the known procedures.<sup>[1]</sup>

## 2. Optimization of Reaction Conditions

**Table S1:** Screening of the bases in xylene.<sup>a</sup>

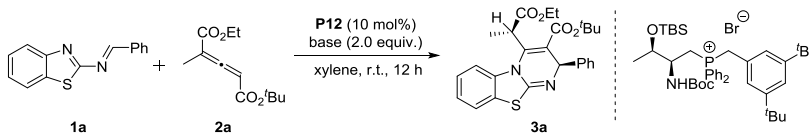

| Entry | Base                                               | Yield (%) | ee (%) | <i>dr</i> |
|-------|----------------------------------------------------|-----------|--------|-----------|
| 1     | K <sub>2</sub> CO <sub>3</sub>                     | 80        | 78     | >20:1     |
| 2     | Cs <sub>2</sub> CO <sub>3</sub>                    | 90        | 55     | >20:1     |
| 3     | K <sub>3</sub> PO <sub>4</sub>                     | 81        | 80     | >20:1     |
| 4     | K <sub>2</sub> HPO <sub>4</sub>                    | trace     | --     | --        |
| 5     | K <sub>3</sub> PO <sub>4</sub> · 7H <sub>2</sub> O | 60        | 77     | >20:1     |
| 6     | (NH <sub>4</sub> ) <sub>2</sub> CO <sub>3</sub>    | 50        | 45     | >20:1     |
| 7     | NaOAc                                              | 10        | 34     | >20:1     |

[a] Reactions were performed with **1a** (0.1 mmol), **2a** (0.12 mmol), **P12** (10 mol%) and corresponding base in toluene (0.5 mL) at room temperature. The *dr* values were determined by <sup>1</sup>H NMR and ee values were determined by HPLC analysis. Isolated yield.

**Table S2:** Screening of the solvent.<sup>a</sup>

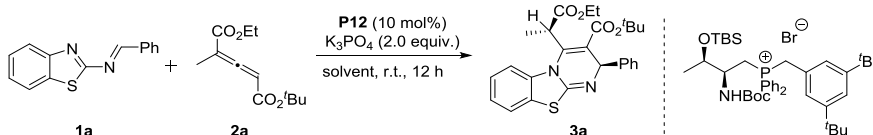

| Entry | Solvent           | Yield (%) | ee (%) | <i>dr</i> |
|-------|-------------------|-----------|--------|-----------|
| 1     | Xylene            | 81        | 80     | >20:1     |
| 2     | Toluene           | 79        | 77     | >20:1     |
| 3     | DCM               | 89        | 44     | >20:1     |
| 4     | EA                | 95        | 31     | 18:1      |
| 5     | MeCN              | 73        | 57     | >20:1     |
| 6     | MTBE              | 60        | 54     | 19:1      |
| 7     | Et <sub>2</sub> O | 44        | 73     | >20:1     |
| 8     | Hexane            | 80        | 82     | >20:1     |
| 9     | Acetone           | 81        | 30     | >20:1     |

[a] Reactions were performed with **1a** (0.1 mmol), **2a** (0.12 mmol), **P12** (10 mol%)

and  $K_3PO_4$  (0.2 mmol) in corresponding solvent (0.5 mL) at room temperature. The *dr* values were determined by  $^1H$  NMR and ee values were determined by HPLC analysis. Isolated yield.

**Table S3:** Screening of the temperature and equivalents of base.<sup>a</sup>

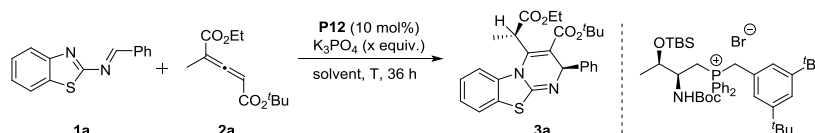

| Entry          | T (°C) | $K_3PO_4$ (x equiv.) | Yield (%) | ee (%) | <i>dr</i> |
|----------------|--------|----------------------|-----------|--------|-----------|
| 1              | r.t.   | 2                    | 80        | 82     | >20:1     |
| 2              | 0      | 2                    | 77        | 85     | >20:1     |
| 3              | -10    | 2                    | 78        | 84     | >20:1     |
| 4              | -20    | 2                    | 74        | 82     | >20:1     |
| 5              | -10    | 4                    | 91        | 90     | >20:1     |
| 6              | -10    | 6                    | 90        | 87     | >20:1     |
| 7 <sup>b</sup> | -10    | 4                    | 82        | 73     | >20:1     |

[a] Reactions were performed with **1a** (0.1 mmol), **2a** (0.12 mmol), **P12** (10 mol%) and  $K_3PO_4$  (0.2 mmol) in corresponding solvent (0.5 mL) at corresponding temperature. The *dr* values were determined by  $^1H$  NMR and ee values were determined by HPLC analysis. Isolated yield. [b] 5 mol% **P12** was used.

### 3. Preparation of the Catalysts

#### A. General procedures for preparation of phosphonium salts

The catalysts **P1-5** are known compounds, and their characterization data were in agreement with those reported in the literature. The phosphonium bromides **P6-12** were prepared according to the reported procedures<sup>[1]</sup> and fully characterized.

#### (S)-2-((tert-butoxycarbonyl)amino)-3-methylbutyl(methyl)diphenylphosphonium iodide (P6)

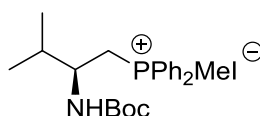

A yellow solid;  $^1H$  NMR (400 MHz,  $CDCl_3$ )  $\delta$  7.95-7.90 (m, 2H), 7.79-7.70 (m, 6H), 7.70-7.63 (m, 2H), 5.94 (d,  $J$  = 10.4 Hz, 1H), 4.69-4.59 (m, 1H), 3.85-3.76 (m, 1H),

2.79 (d,  $J = 14.0$  Hz, 3H), 2.11-2.03 (m, 1H), 1.70 (s, 1H), 1.33 (s, 9H), 0.93 (dd,  $J = 6.7, 0.8$  Hz, 6H);  $^{13}\text{C}$  NMR (100 MHz,  $\text{CDCl}_3$ )  $\delta$  155.5, 134.9 (d,  $J = 2.7$  Hz), 134.6 (d,  $J = 2.9$  Hz), 132.5 (d,  $J = 10.3$  Hz), 132.3 (d,  $J = 9.8$  Hz), 130.4 (d,  $J = 12.5$  Hz), 130.2 (d,  $J = 12.6$  Hz), 119.7 (dd,  $J = 150.7, 85.7$  Hz), 79.7, 51.1 (d,  $J = 5.3$  Hz), 34.5 (d,  $J = 13.1$  Hz), 28.3, 27.2 (d,  $J = 52.2$  Hz), 19.4, 18.1, 8.6 (d,  $J = 54.5$  Hz);  $^{31}\text{P}$  NMR (162 MHz,  $\text{CDCl}_3$ )  $\delta$  23.18; HRMS (ESI)  $m/z$  calcd for  $\text{C}_{23}\text{H}_{33}\text{NO}_2\text{PI}$   $[\text{M-I}]^+ = 386.2249$ , found = 386.2247.

**(S)-2-((tert-butoxycarbonyl)amino)propyl(methyl)diphenylphosphonium iodide (P7)**

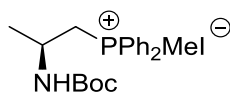

A white solid;  $^1\text{H}$  NMR (400 MHz, MeOD)  $\delta$  7.32-7.27 (m, 2H), 7.21-7.10 (m, 4H), 7.08-7.01 (m, 4H), 3.49-3.44 (m, 1H), 2.73-2.61 (m, 2H), 2.10 (d,  $J = 14.2$  Hz, 3H), 0.70 (dd,  $J = 6.7, 2.5$  Hz, 3H), 0.59 (s, 9H).  $^{13}\text{C}$  NMR (100 MHz, MeOD)  $\delta$  156.5, 135.4 (d,  $J = 2.9$  Hz), 133.3 (d,  $J = 10.0$  Hz), 133.0 (d,  $J = 10.0$  Hz), 131.1, 130.9, 122.6, 120.7 (d,  $J = 15.5$  Hz), 120.8, 79.8 (d,  $J = 88.7$  Hz), 43.1, 31.0 (d,  $J = 52.0$  Hz), 28.4, 23.6 (d,  $J = 14.8$  Hz), 6.9 (d,  $J = 54.8$  Hz).  $^{31}\text{P}$  NMR (162 MHz, MeOD)  $\delta$  21.33. HRMS (ESI)  $m/z$  calcd for  $\text{C}_{21}\text{H}_{29}\text{NO}_2\text{PI}$   $[\text{M-I}]^+ = 358.1936$ , found = 358.1934.

**((2S,3R)-2-((tert-butoxycarbonyl)amino)-3-((tert-butyl)diphenylsilyloxy)butyl(methyl)diphenylphosphonium iodide (P8)**

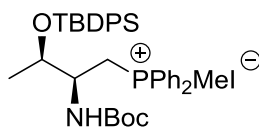

A white solid;  $^1\text{H}$  NMR (400 MHz,  $\text{CDCl}_3$ )  $\delta$  7.80-7.60 (m, 8H), 7.59-7.54 (m, 6H), 7.34-7.28 (m, 6H), 5.77 (d,  $J = 10.0$  Hz, 1H), 4.14 (s, 2H), 3.80-3.71 (m, 1H), 3.06 (td,  $J = 14.5, 4.3$  Hz, 1H), 2.77 (dd,  $J = 13.8, 3.6$  Hz, 3H), 1.24 (s, 9H), 1.13 (d,  $J = 5.0$  Hz, 3H), 0.98 (d,  $J = 3.0$  Hz, 9H).  $^{13}\text{C}$  NMR (100 MHz,  $\text{CDCl}_3$ )  $\delta$  155.0, 135.6, 135.5, 134.6, 134.5, 133.1 (d,  $J = 40.0$  Hz), 132.3, 132.2, 132.1, 130.2, 130.1, 130.0, 129.8 (d,  $J = 3.0$  Hz), 127.8, 127.6, 119.5, 118.6, 79.8, 71.4 (d,  $J = 14.1$  Hz), 50.5, 28.1,

26.9, 24.1 (d,  $J = 55.4$  Hz), 19.1, 18.6, 8.2 (d,  $J = 53.3$  Hz).  $^{31}\text{P}$  NMR (162 MHz,  $\text{CDCl}_3$ )  $\delta$  23.91. HRMS (ESI)  $m/z$  calcd for  $\text{C}_{38}\text{H}_{49}\text{NO}_3\text{PSi}$   $[\text{M}-\text{I}]^+ = 626.3214$ , found = 626.3210.

**((2*S*,3*R*)-2-((*tert*-butoxycarbonyl)amino)-3-((*tert*-butyldimethylsilyl)oxy)butyl)(methyl)diphenylphosphonium iodide (P9)**

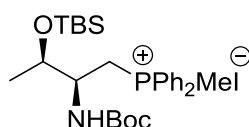

A white solid;  $^1\text{H}$  NMR (400 MHz,  $\text{CDCl}_3$ )  $\delta$  7.86-7.72 (m, 6H), 7.65-7.61 (m, 4H), 5.90 (d,  $J = 8.7$  Hz, 1H), 4.12-3.87 (m, 3H), 3.33 (t,  $J = 14.5$  Hz, 9H), 2.83 (d,  $J = 14.0$  Hz, 3H), 1.29 (s, 9H), 1.20 (d,  $J = 6.0$  Hz, 3H), 0.82 (s, 9H), 0.04 (s, 3H), 0.00 (s, 3H).  $^{13}\text{C}$  NMR (100 MHz,  $\text{CDCl}_3$ )  $\delta$  155.3, 134.8 (d,  $J = 3.0$  Hz), 134.6 (d,  $J = 3.0$  Hz), 132.3 (d,  $J = 10.0$  Hz), 132.3 (d,  $J = 10.0$  Hz), 130.3 (d,  $J = 13.0$  Hz), 130.1 (d,  $J = 12.0$  Hz), 120.7, 119.3 (d,  $J = 85.2$  Hz), 79.9, 70.1 (d,  $J = 14.3$  Hz), 50.8, 28.2, 25.8, 23.76, 18.6, 17.9, 8.6 (d,  $J = 54.3$  Hz), -4.6 (d,  $J = 9.5$  Hz).  $^{31}\text{P}$  NMR (162 MHz,  $\text{CDCl}_3$ )  $\delta$  23.91. HRMS (ESI)  $m/z$  calcd for  $\text{C}_{28}\text{H}_{45}\text{NO}_3\text{PSi}$   $[\text{M}-\text{I}]^+ = 502.2091$ , found = 502.2095.

**benzyl((2*S*,3*R*)-2-((*tert*-butoxycarbonyl)amino)-3-((*tert*-butyldimethylsilyl)oxy)butyl)diphenylphosphonium bromide (P10)**

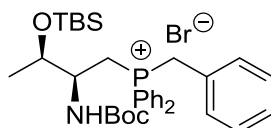

A white solid;  $^1\text{H}$  NMR (400 MHz,  $\text{CDCl}_3$ )  $\delta$  7.87-7.84 (m, 2H), 7.74-7.70 (m, 4H), 7.61-7.51 (m, 4H), 7.14-7.12 (m, 1H), 7.05 (t,  $J = 7.4$  Hz, 2H), 6.94-6.93 (m, 2H), 6.08 (d,  $J = 8.9$  Hz, 1H), 5.10 (t,  $J = 14.8$  Hz, 1H), 4.49 (dd,  $J = 25.1, 12.6$  Hz, 1H), 4.29 (t,  $J = 14.5$  Hz, 1H), 3.93 (d,  $J = 6.0$  Hz, 2H), 3.04 (t,  $J = 14.6$  Hz, 1H), 1.24 (s, 9H), 1.15 (d,  $J = 5.8$  Hz, 3H), 0.74 (d,  $J = 2.2$  Hz, 9H), -0.00 (d,  $J = 2.6$  Hz, 3H), -0.05 (d,  $J = 2.3$  Hz, 3H).  $^{13}\text{C}$  NMR (100 MHz,  $\text{CDCl}_3$ )  $\delta$  155.0, 134.6 (d,  $J = 3.0$  Hz), 134.5 (d,  $J = 3.0$  Hz), 133.9 (d,  $J = 7.4$  Hz), 130.5 (d,  $J = 5.5$  Hz), 129.9, 129.8, 129.7,

128.7 (d,  $J = 3.0$  Hz), 128.1 (d,  $J = 4.0$  Hz), 127.5 (d,  $J = 9.0$  Hz), 117.7 (d,  $J = 28.0$  Hz), 116.9 (d,  $J = 31.0$  Hz), 79.5, 69.7 (d,  $J = 14.0$  Hz), 50.2 (d,  $J = 5.0$  Hz), 30.4 (d,  $J = 45.0$  Hz), 28.2, 25.7, 20.9 (d,  $J = 52.0$  Hz), 17.7 (d,  $J = 14.0$  Hz), -4.7 (d,  $J = 16.0$  Hz).  $^{31}\text{P}$  NMR (162 MHz,  $\text{CDCl}_3$ )  $\delta$  26.22. HRMS (ESI)  $m/z$  calcd for  $\text{C}_{34}\text{H}_{48}\text{NO}_3\text{PSiBr}$   $[\text{M}-\text{Br}]^+ = 577.3141$ , found = 577.3136.

**((2*S*,3*R*)-2-((*tert*-butoxycarbonyl)amino)-3-((*tert*-butyldimethylsilyl)oxy)butyl)(3,5-dimethylbenzyl)diphenylphosphonium bromide (P11)**

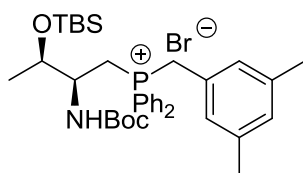

A white solid;  $^1\text{H}$  NMR (400 MHz,  $\text{CDCl}_3$ )  $\delta$  7.90-7.85 (m, 2H), 7.74-7.69 (m, 4H), 7.62-7.55 (m, 4H), 6.76 (s, 1H), 6.44 (s, 2H), 6.13 (s, 1H), 4.94-4.87 (m, 1H), 4.39 (d,  $J = 11.4$  Hz, 1H), 4.18 (t,  $J = 14.5$  Hz, 1H), 3.93 (s, 2H), 3.03 (t,  $J = 14.6$  Hz, 1H), 2.02 (s, 6H), 1.26 (d,  $J = 2.0$  Hz, 9H), 1.17-1.15 (m, 3H), 0.75 (d,  $J = 1.9$  Hz, 9H), 0.01 (d,  $J = 2.1$  Hz, 3H), -0.04 (d,  $J = 1.9$  Hz, 3H).  $^{13}\text{C}$  NMR (100 MHz,  $\text{CDCl}_3$ )  $\delta$  155.1, 138.3 (d,  $J = 3.4$  Hz), 134.5, 134.0 (d,  $J = 4.1$  Hz), 134.0 (d,  $J = 4.1$  Hz), 129.8 (d,  $J = 5.3$  Hz), 129.7, 129.6, 129.5, 128.3 (d,  $J = 5.6$  Hz), 127.0 (d,  $J = 8.9$  Hz), 117.9 (d,  $J = 8.5$  Hz), 117.1 (d,  $J = 11.0$  Hz), 79.5, 69.8 (d,  $J = 13.8$  Hz), 50.3, 30.5 (d,  $J = 45.5$  Hz), 28.3, 25.7, 21.4, 20.9, 17.8, 0.1, -4.7 (d,  $J = 20.6$  Hz).  $^{31}\text{P}$  NMR (162 MHz,  $\text{CDCl}_3$ )  $\delta$  26.14. HRMS (ESI)  $m/z$  calcd for  $\text{C}_{36}\text{H}_{52}\text{NO}_3\text{PSiBr}$   $[\text{M}-\text{Br}]^+ = 605.3454$ , found = 605.3449.

**((2*S*,3*R*)-2-((*tert*-butoxycarbonyl)amino)-3-((*tert*-butyldimethylsilyl)oxy)butyl)(3,5-di-*tert*-butylbenzyl)diphenylphosphonium bromide (P12)**

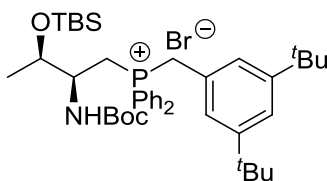

A white solid;  $^1\text{H}$  NMR (400 MHz,  $\text{CDCl}_3$ )  $\delta$  7.98 (dd,  $J = 12.4, 7.8$  Hz, 2H), 7.79-7.74 (m, 4H), 7.66-7.59 (m, 5H), 7.42 (s, 2H), 5.95 (d,  $J = 9.0$  Hz, 1H), 5.64 (t,  $J$

= 15.2 Hz, 1H), 4.63-4.50 (m, 2H), 3.99-3.93 (m, 2H), 3.12 (t,  $J = 14.5$  Hz, 1H), 1.26 (s, 9H), 1.16 (d,  $J = 5.9$  Hz, 3H), 0.74 (s, 9H), 0.02 (s, 3H), -0.04 (s, 3H).  $^{13}\text{C}$  NMR (100 MHz,  $\text{CDCl}_3$ )  $\delta$  155.1, 135.3 (d,  $J = 21.0$  Hz), 134.1, 133.9 (d,  $J = 9.2$  Hz), 132.1 (d,  $J = 30.7$  Hz), 131.2 (d,  $J = 8.8$  Hz), 130.8, 130.4 (d,  $J = 5.1$  Hz), 130.3 (d,  $J = 4.8$  Hz), 124.0, 122.1, 121.3, 116.7 (d,  $J = 18.0$  Hz), 115.9 (d,  $J = 19.5$  Hz), 79.8, 69.8 (d,  $J = 13.8$  Hz), 50.2, 30.4 (d,  $J = 46.3$  Hz), 28.3, 25.7, 21.5 (d,  $J = 51.3$  Hz), 17.8, 17.62, 0.0, -4.7, -4.8.  $^{31}\text{P}$  NMR (162 MHz,  $\text{CDCl}_3$ )  $\delta$  27.32. HRMS (ESI)  $m/z$  calcd for  $\text{C}_{42}\text{H}_{64}\text{NO}_3\text{PSiBr}$   $[\text{M}-\text{Br}]^+ = 689.4939$ , found = 689.4940.

#### 4. General Procedure for the Synthesis of Substrates

##### *General procedure for preparing allenates:*

All 2-benzothiazolimines and allenates were prepared from the corresponding literature procedure.<sup>[2,3]</sup> Unknown compounds **2a**, **2c** and **2e-f** were fully characterized.

##### **5-(tert-butyl) 1-ethyl 2-ethylpenta-2,3-dienedioate (2a)**

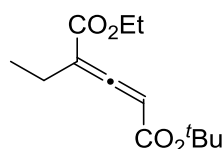

A colorless liquid;  $^1\text{H}$  NMR (400 MHz,  $\text{CDCl}_3$ )  $\delta$  5.86 (t,  $J = 3.1$  Hz, 1H), 4.27-4.16 (m, 2H), 2.42-2.28 (m, 2H), 1.47 (s, 9H), 1.27 (t,  $J = 7.1$  Hz, 3H), 1.07 (t,  $J = 7.4$  Hz, 3H).  $^{13}\text{C}$  NMR (100 MHz,  $\text{CDCl}_3$ )  $\delta$  217.8, 165.6, 163.6, 106.5, 94.0, 81.7, 61.5, 28.2, 21.8, 14.3, 12.4. HRMS (ESI)  $m/z$  calcd for  $\text{C}_{13}\text{H}_{20}\text{O}_4$   $[\text{M}+\text{Na}]^+ = 263.1259$ , found = 263.1257;

##### **5-(tert-butyl) 1-ethyl 2-pentylpenta-2,3-dienedioate (2c)**



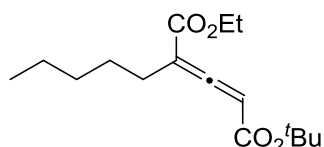

A colorless liquid;  $^1\text{H}$  NMR (400 MHz,  $\text{CDCl}_3$ )  $\delta$  5.82 (t,  $J = 2.8$  Hz, 1H), 4.21 (q,  $J = 7.1$  Hz, 2H), 2.39-2.21 (m, 2H), 1.46 (d,  $J = 5.2$  Hz, 9H), 1.34-1.20 (m, 8H), 0.87 (t,  $J = 7.0$  Hz, 3H).  $^{13}\text{C}$  NMR (100 MHz,  $\text{CDCl}_3$ )  $\delta$  218.1, 165.6, 163.6, 104.8, 93.5, 81.7, 61.5, 31.2, 28.2 (d,  $J = 11.5$  Hz), 27.5, 22.5, 14.3, 14.1. HRMS (ESI)  $m/z$  calcd for  $\text{C}_{16}\text{H}_{26}\text{O}_4$   $[\text{M}+\text{Na}]^+ = 305.1729$ , found = 305.1726;

**5-(tert-butyl) 1-ethyl 2-(3-chlorobenzyl)penta-2,3-dienedioate (2e)**

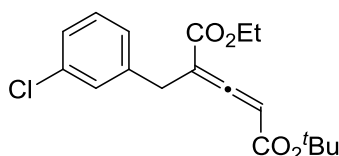

A colorless liquid;  $^1\text{H}$  NMR (400 MHz,  $\text{CDCl}_3$ )  $\delta$  7.33-7.32 (m, 1H), 7.27 (d,  $J = 3.3$  Hz, 1H), 7.25-7.21 (m, 1H), 5.86 (t,  $J = 2.5$  Hz, 1H), 4.27 (qd,  $J = 7.1, 0.9$  Hz, 2H), 3.68 (ddd,  $J = 41.5, 15.2, 2.6$  Hz, 2H), 1.54 (s, 9H), 1.32 (t,  $J = 7.1$  Hz, 3H).  $^{13}\text{C}$  NMR (100 MHz,  $\text{CDCl}_3$ )  $\delta$  218.5, 165.0, 163.0, 139.9, 134.2, 129.7, 129.2, 127.3, 127.1, 103.9, 94.1, 82.1, 61.8, 34.7, 28.2, 14.3. HRMS (ESI)  $m/z$  calcd for  $\text{C}_{18}\text{H}_{21}\text{ClO}_4$   $[\text{M}+\text{Na}]^+ = 359.1026$ , found = 359.1026;

**5-(tert-butyl) 1-ethyl 2-(2,4-dichlorobenzyl)penta-2,3-dienedioate (2f)**

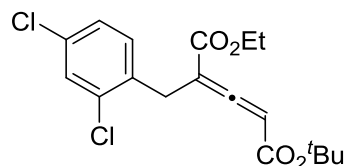

A colorless liquid;  $^1\text{H}$  NMR (400 MHz,  $\text{CDCl}_3$ )  $\delta$  7.35 (d,  $J = 2.0$  Hz, 1H), 7.27-7.26 (m, 1H), 7.15 (dd,  $J = 8.3, 2.0$  Hz, 1H), 5.76 (t,  $J = 2.7$  Hz, 1H), 4.21 (q,  $J = 7.1$  Hz, 2H), 3.74 (ddd,  $J = 44.9, 15.6, 2.7$  Hz, 2H), 1.43 (s, 9H), 1.26 (t,  $J = 7.1$  Hz, 3H).  $^{13}\text{C}$

NMR (100 MHz, CDCl<sub>3</sub>)  $\delta$  217.2, 163.7, 161.7, 134.0, 133.0, 132.13, 130.8, 128.2, 125.9, 101.7, 93.2, 80.8, 60.7, 30.8, 27.0, 13.1. HRMS (ESI)  $m/z$  calcd for C<sub>18</sub>H<sub>20</sub>Cl<sub>2</sub>O<sub>4</sub> [M+Na]<sup>+</sup> = 393.0636, found = 393.0634;

## 5. General Procedure for the Asymmetric Synthesis of 3 and 4.

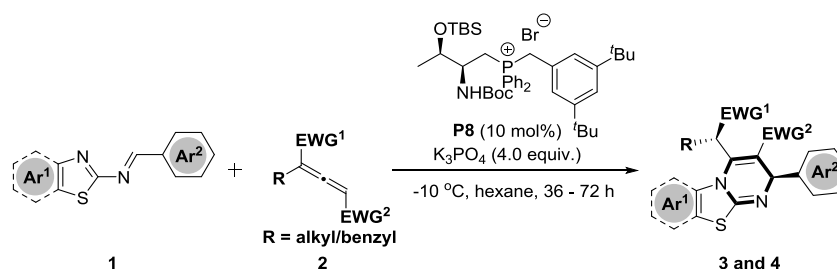

To a flame-dried round bottle flask with a magnetic stirring bar were added the 2-benzothiazolimines (0.1 mmol), allenates (0.12 mmol), phosphonium salt **P12** (0.01 mmol) and K<sub>3</sub>PO<sub>4</sub> (0.4 mmol), followed by the addition of Hexane (0.5 mL). The reaction mixture was stirred at -10 °C for 36-72 h. The solvent was removed under reduced pressure, and the residue was purified by column chromatography on silica gel to afford products **3/4**.

### *tert*-butyl(*R*)-4-((*S*)-1-ethoxy-1-oxopropan-2-yl)-2-phenyl-2*H*-benzo[4,5]thiazolo[3,2-*a*]pyrimidine-3-carboxylate (3a)

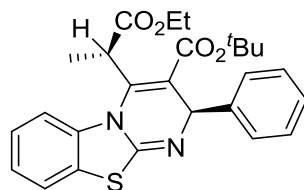

White foam, (42.2 mg), 91% yield;  $[\alpha]_D^{25} = +83.3$  (*c* 0.40, CHCl<sub>3</sub>); <sup>1</sup>H NMR (400 MHz, CDCl<sub>3</sub>)  $\delta$  7.42-7.41 (m 2H), 7.34-7.32 (m, 1H), 7.29-7.27 (m, 1H), 7.26-7.25 (m, 1H), 7.23-7.19 (m, 1H), 7.19-7.16 (m, 2H), 7.14-7.09 (m, 1H), 5.91 (s, 1H), 4.32-4.25 (m, 3H), 1.59 (s, 1H), 1.50 (d, *J* = 6.9 Hz, 3H), 1.40 (s, 9H), 1.29 (t, *J* = 7.2 Hz, 3H); <sup>13</sup>C NMR (100 MHz, CDCl<sub>3</sub>)  $\delta$  171.4, 164.7, 146.8, 141.3, 135.5, 128.5, 127.4, 126.9, 126.6, 125.7, 125.1, 124.5, 122.9, 115.1, 81.7, 61.4, 61.3, 39.2, 27.9,

16.1, 14.2. HRMS (ESI)  $m/z$  calcd for  $C_{26}H_{28}N_2O_4S [M+Na]^+$  = 487.1667, found = 487.1665; The ee value was 90%,  $t_R$  (major) = 24.1 min,  $t_R$  (minor) = 32.9 min (Chiralcel IC,  $\lambda$  = 254 nm, 10% *i*-PrOH/hexanes, flow rate = 0.5 mL/min).

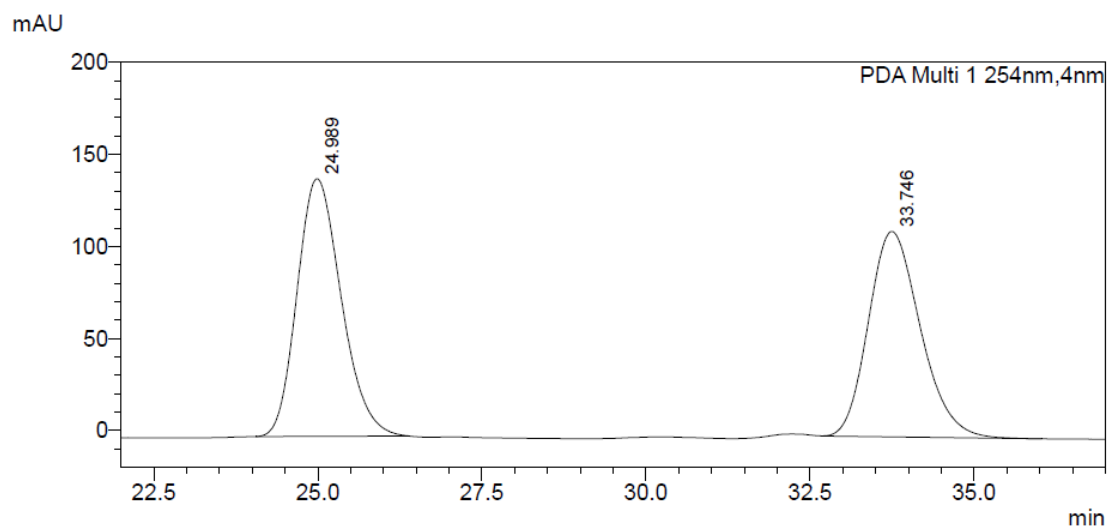

Peak Table

PDA Ch1 254nm

| Peak# | Ret. Time | Height | Height% | Area     | Area%   |
|-------|-----------|--------|---------|----------|---------|
| 1     | 24.989    | 139865 | 55.644  | 6552927  | 51.655  |
| 2     | 33.746    | 111489 | 44.356  | 6133136  | 48.345  |
| Total |           | 251354 | 100.000 | 12686063 | 100.000 |

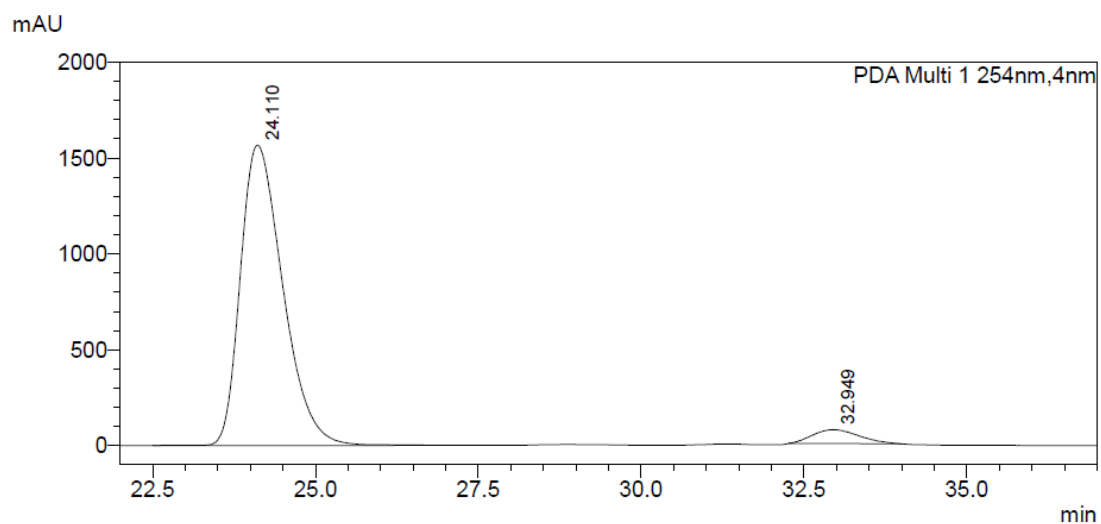

Peak Table

PDA Ch1 254nm

| Peak# | Ret. Time | Height  | Height% | Area     | Area%   |
|-------|-----------|---------|---------|----------|---------|
| 1     | 24.110    | 1568449 | 95.582  | 71047252 | 95.176  |
| 2     | 32.949    | 72498   | 4.418   | 3601246  | 4.824   |
| Total |           | 1640946 | 100.000 | 74648498 | 100.000 |

***tert*-butyl(*R*)-4-((*S*)-1-ethoxy-1-oxopropan-2-yl)-2-(*p*-tolyl)-2*H*-benzo[4,5]thiazolo [3,2-*a*]pyrimidine-3-carboxylate (3b)**

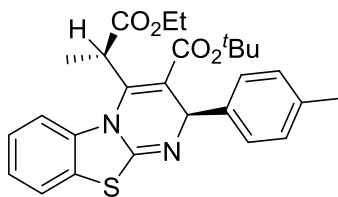

White foam, (43.0 mg), 90% yield;  $[\alpha]_D^{25} = +94.4$  ( $c$  0.40,  $\text{CHCl}_3$ );  $^1\text{H}$  NMR (400 MHz,  $\text{CDCl}_3$ )  $\delta$  7.33-7.30 (m, 3H), 7.19-7.13 (m, 2H), 7.12-7.06 (m, 3H), 5.89 (s, 1H), 4.31-4.26 (m, 3H), 2.28 (s, 3H), 1.49 (d,  $J = 6.9$  Hz, 3H), 1.40 (s, 9H), 1.31 (t,  $J = 7.2$  Hz, 3H);  $^{13}\text{C}$  NMR (100 MHz,  $\text{CDCl}_3$ )  $\delta$  171.5, 164.8, 157.3, 146.7, 138.5, 136.9, 135.6, 129.1, 126.8, 125.6, 125.1, 124.4, 122.8, 115.0, 110.6, 81.5, 61.3, 61.2, 39.1, 27.9, 21.1, 16.1, 14.2. HRMS (ESI)  $m/z$  calcd for  $\text{C}_{27}\text{H}_{30}\text{N}_2\text{O}_4\text{S}$   $[\text{M}+\text{Na}]^+ = 501.1824$ , found = 501.1820; The ee value was 90%,  $t_R$  (major) = 25.0 min,  $t_R$  (minor) = 31.0 min (Chiralcel IC,  $\lambda = 254$  nm, 10% *i*-PrOH/hexanes, flow rate = 0.5 mL/min).

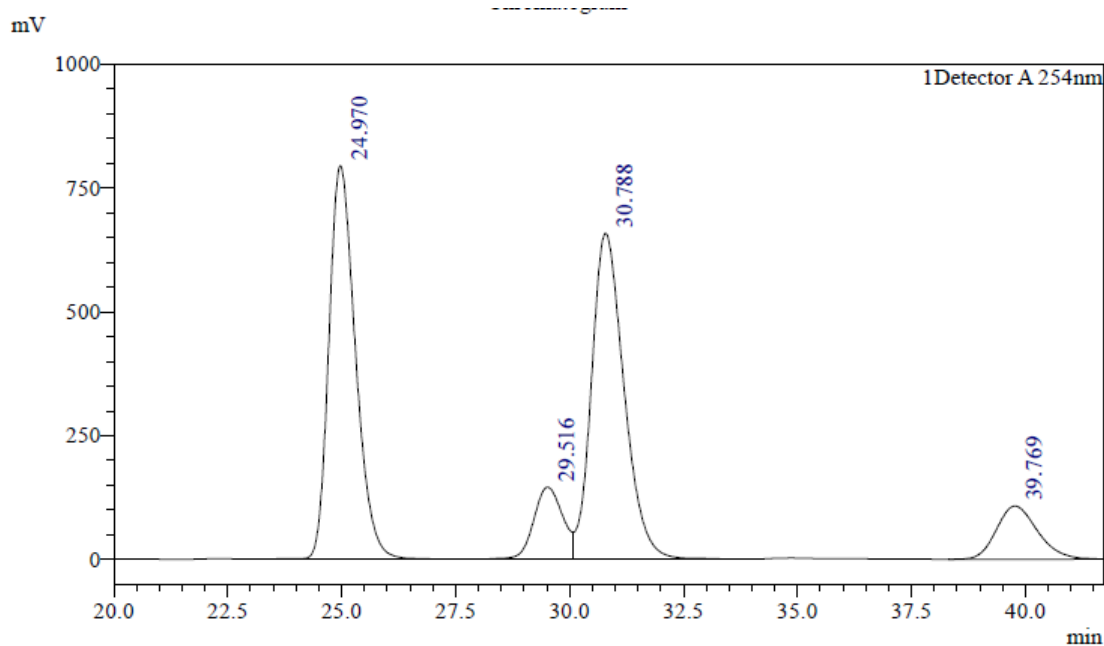

Peak Table

| Peak# | Ret. Time | Height  | Height% | Area     | Area%   |
|-------|-----------|---------|---------|----------|---------|
| 1     | 24.970    | 794397  | 46.565  | 32176126 | 41.214  |
| 2     | 29.516    | 145832  | 8.548   | 6449098  | 8.261   |
| 3     | 30.788    | 658325  | 38.589  | 32709433 | 41.897  |
| 4     | 39.769    | 107448  | 6.298   | 6736825  | 8.629   |
| Total |           | 1706002 | 100.000 | 78071483 | 100.000 |

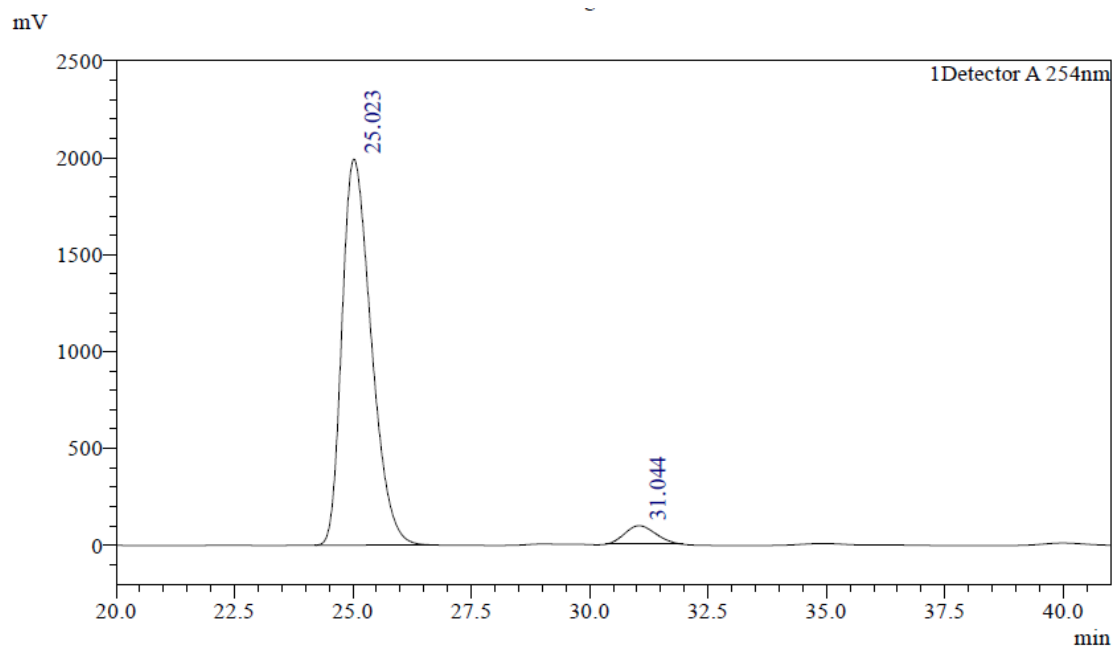

Peak Table

| Detector A 254nm |           |         |         |          |         |
|------------------|-----------|---------|---------|----------|---------|
| Peak#            | Ret. Time | Height  | Height% | Area     | Area%   |
| 1                | 25.023    | 1991227 | 95.456  | 85535250 | 95.165  |
| 2                | 31.044    | 94785   | 4.544   | 4346053  | 4.835   |
| Total            |           | 2086012 | 100.000 | 89881303 | 100.000 |

**tert-butyl(R)-4-((S)-1-ethoxy-1-oxopropan-2-yl)-2-(4-methoxyphenyl)-2H-benzo[4,5]thiazolo[3,2-a]pyrimidine-3-carboxylate (3c)**

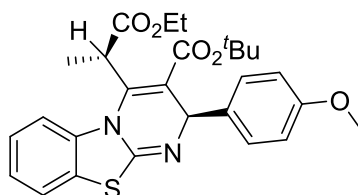

White foam, (41.5 mg), 84% yield;  $[\alpha]_D^{25} = +138.1$  ( $c$  0.55,  $\text{CHCl}_3$ );  $^1\text{H NMR}$  (400 MHz,  $\text{CDCl}_3$ )  $\delta$  7.35-7.32 (m, 3H), 7.21-7.12 (m, 3H), 6.82-6.78 (m, 2H), 5.85 (s, 1H), 4.28 (dd,  $J = 13.5, 6.8$  Hz, 3H), 3.75 (s, 3H), 1.49 (d,  $J = 6.9$  Hz, 3H), 1.39 (s, 9H), 1.30 (t,  $J = 7.2$  Hz, 3H);  $^{13}\text{C NMR}$  (100 MHz,  $\text{CDCl}_3$ )  $\delta$  171.5, 164.8, 157.4, 158.9, 146.6, 135.6, 133.6, 128.1, 125.7, 125.1, 124.5, 122.9, 115.0, 113.8, 111.0, 81.6, 61.4, 60.9, 55.2, 39.2, 28.0, 16.1, 14.2. HRMS (ESI)  $m/z$  calcd for  $\text{C}_{27}\text{H}_{30}\text{N}_2\text{O}_5\text{S}$   $[\text{M}+\text{Na}]^+ = 517.1773$ , found = 517.1755; The ee value was 89%,  $t_R$  (major) = 37.6 min,  $t_R$  (minor) = 47.3 min (Chiralcel IC,  $\lambda = 254$  nm, 10% *i*-PrOH/hexanes, flow rate = 1.0 mL/min).

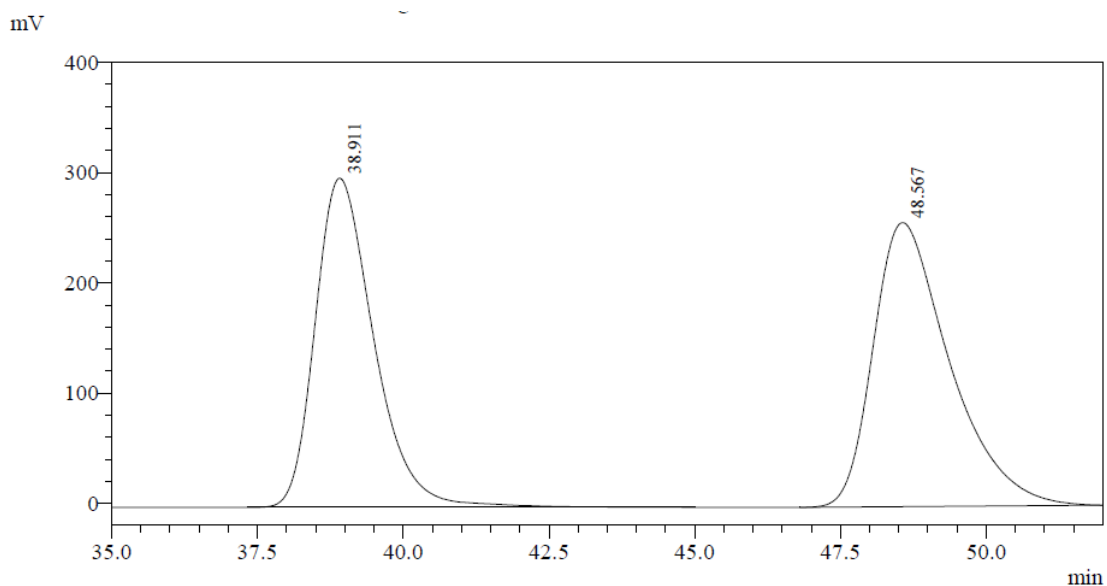

Peak Table

| Detector A 254nm |           |        |         |          |         |
|------------------|-----------|--------|---------|----------|---------|
| Peak#            | Ret. Time | Height | Height% | Area     | Area%   |
| 1                | 38.911    | 298515 | 53.676  | 20943188 | 47.135  |
| 2                | 48.567    | 257629 | 46.324  | 23489045 | 52.865  |
| Total            |           | 556143 | 100.000 | 44432233 | 100.000 |

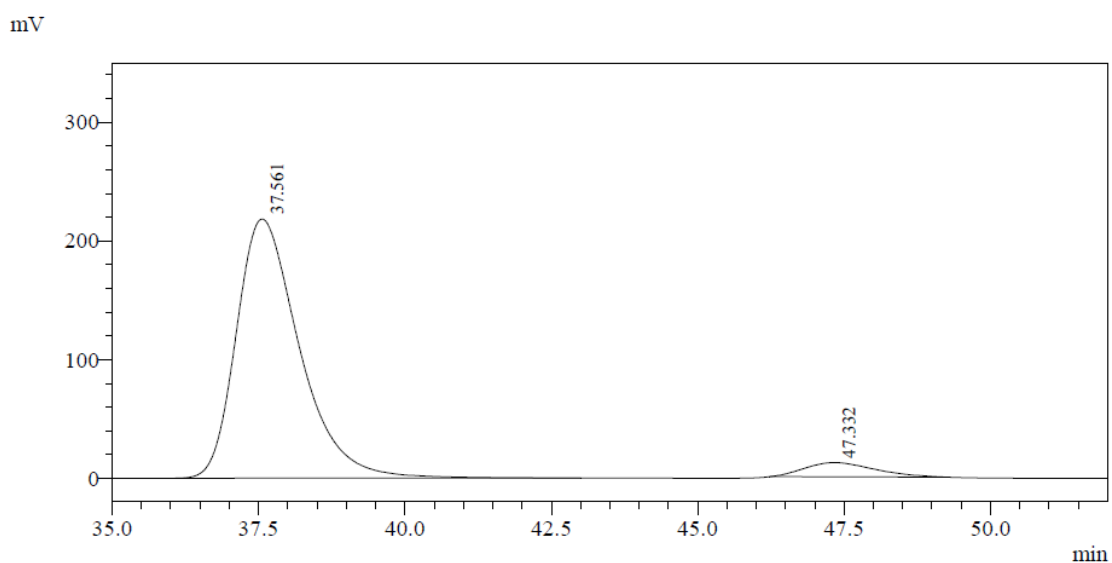

Peak Table

| Detector A 254nm |           |        |         |          |         |
|------------------|-----------|--------|---------|----------|---------|
| Peak#            | Ret. Time | Height | Height% | Area     | Area%   |
| 1                | 37.561    | 218488 | 94.810  | 16380279 | 94.276  |
| 2                | 47.332    | 11961  | 5.190   | 994455   | 5.724   |
| Total            |           | 230449 | 100.000 | 17374734 | 100.000 |

***tert*-butyl(*R*)-4-((*S*)-1-ethoxy-1-oxopropan-2-yl)-2-(4-fluorophenyl)-2*H*-benzo[4,5]thiazolo[3,2-*a*]pyrimidine-3-carboxylate (3d)**

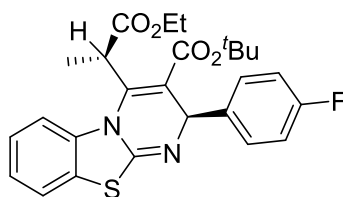

White foam, (44.8 mg), 93% yield;  $[\alpha]_D^{25} = +129.0$  ( $c$  0.60,  $\text{CHCl}_3$ );  $^1\text{H}$  NMR (400 MHz,  $\text{CDCl}_3$ )  $\delta$  7.40-7.33 (m, 3H), 7.18-7.16 (m, 2H), 7.15-7.10 (m, 1H), 6.94 (ddd,  $J = 9.8, 5.9, 2.6$  Hz, 2H), 5.87 (s, 1H), 4.34-4.22 (m, 3H), 1.49 (d,  $J = 6.9$  Hz, 3H), 1.39 (s, 9H), 1.29 (t,  $J = 7.2$  Hz, 3H).  $^{13}\text{C}$  NMR (100 MHz,  $\text{CDCl}_3$ )  $\delta$  171.6, 164.9, 163.6, 161.1, 157.8, 147.2, 137.6 (d,  $J = 3.0$  Hz), 135.7, 128.8 (d,  $J = 8.0$  Hz), 125.3, 124.8, 124.6 (d,  $J = 281.0$  Hz), 115.6, 115.3 (d,  $J = 14.0$  Hz), 110.6, 81.9, 61.6, 61.1, 39.4, 28.2, 16.3, 14.5. HRMS (ESI)  $m/z$  calcd for  $\text{C}_{26}\text{H}_{27}\text{FN}_2\text{O}_4\text{S}$   $[\text{M}+\text{Na}]^+ = 505.1573$ , found = 505.1571; The ee value was 85%,  $t_R$  (major) = 11.6 min,  $t_R$  (minor) = 13.0 min (Chiralcel IC,  $\lambda = 254$  nm, 5% *i*-PrOH/hexanes, flow rate = 1.0 mL/min).

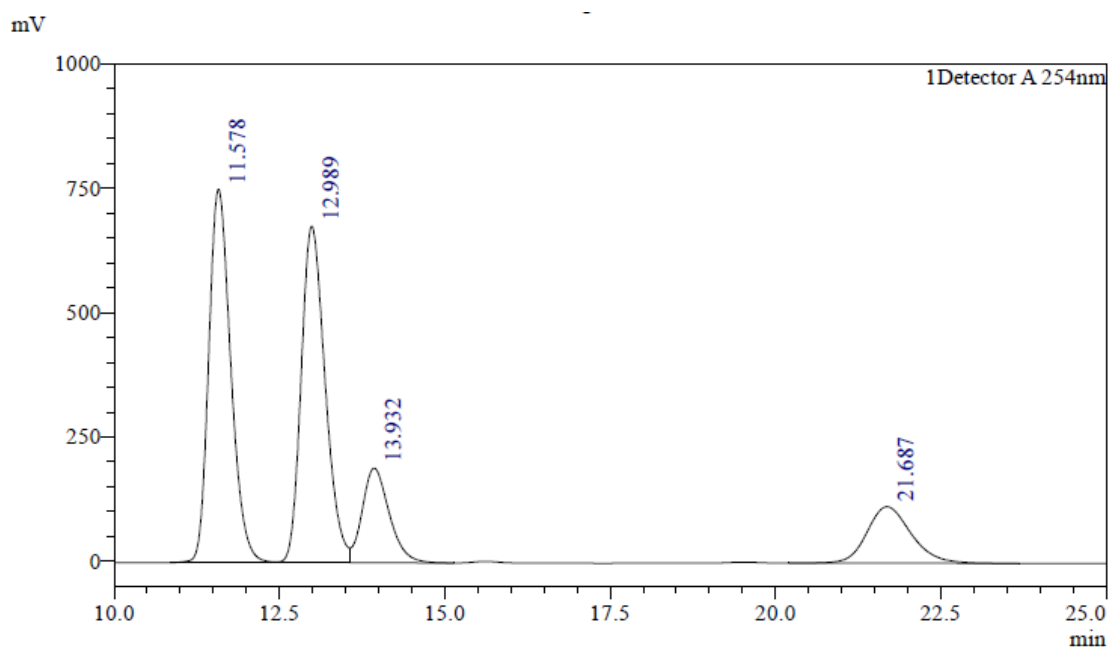

Peak Table

| Detector A 254nm |           |         |         |          |         |
|------------------|-----------|---------|---------|----------|---------|
| Peak#            | Ret. Time | Height  | Height% | Area     | Area%   |
| 1                | 11.578    | 750950  | 43.365  | 17388276 | 38.495  |
| 2                | 12.989    | 676871  | 39.087  | 17073093 | 37.797  |
| 3                | 13.932    | 190395  | 10.995  | 5419662  | 11.998  |
| 4                | 21.687    | 113487  | 6.553   | 5289126  | 11.709  |
| Total            |           | 1731703 | 100.000 | 45170157 | 100.000 |

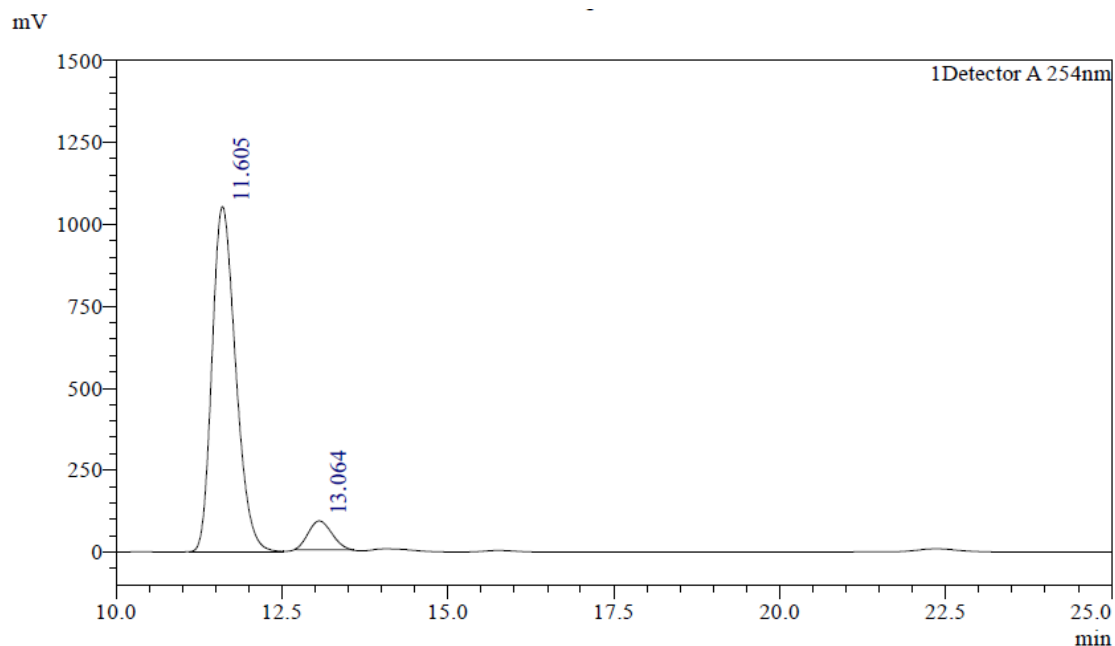

Peak Table

| Peak# | Ret. Time | Height  | Height% | Area     | Area%   |
|-------|-----------|---------|---------|----------|---------|
| 1     | 11.605    | 1053359 | 92.281  | 26099105 | 92.300  |
| 2     | 13.064    | 88106   | 7.719   | 2177382  | 7.700   |
| Total |           | 1141466 | 100.000 | 28276487 | 100.000 |

**tert-butyl(R)-2-(4-chlorophenyl)-4-((S)-1-ethoxy-1-oxopropan-2-yl)-2H-benzo[4,5]thiazolo[3,2-a]pyrimidine-3-carboxylate (3e)**

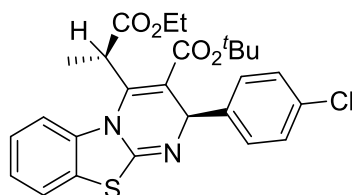

White foam, (44.3 mg), 89% yield;  $[\alpha]_D^{25} = +98.2$  (*c* 0.40, CHCl<sub>3</sub>); <sup>1</sup>H NMR (400 MHz, CDCl<sub>3</sub>) δ 7.36-7.34 (m, 3H), 7.25-7.22 (m, 2H), 7.18-7.11 (m, 3H), 5.87 (s, 1H), 4.28 (dd, *J* = 13.4, 6.6 Hz, 3H), 1.49 (d, *J* = 6.9 Hz, 3H), 1.40 (s, 9H), 1.30 (t, *J* = 7.2 Hz, 3H); <sup>13</sup>C NMR (100 MHz, CDCl<sub>3</sub>) δ 171.4, 164.6, 157.6, 147.3, 140.2, 135.5, 133.1, 128.6, 128.3, 125.7, 125.1, 124.6, 122.9, 115.1, 109.9, 81.7, 61.4, 61.0, 39.2, 28.0, 16.1, 14.3. HRMS (ESI) *m/z* calcd for C<sub>26</sub>H<sub>27</sub>ClN<sub>2</sub>O<sub>4</sub>S [M+Na]<sup>+</sup> = 521.1278, found = 521.1427; The ee value was 91%, *t<sub>R</sub>* (major) = 19.6 min, *t<sub>R</sub>* (minor) = 28.7 min (Chiralcel IC, λ = 254 nm, 5% *i*-PrOH/hexanes, flow rate = 1.0 mL/min).



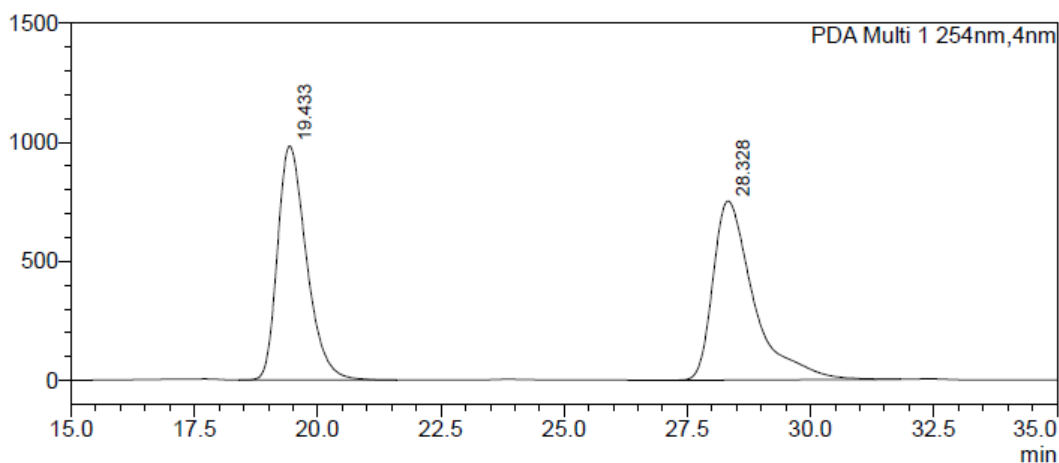

Peak Table

| Peak# | Ret. Time | Height  | Height% | Area     | Area%   |
|-------|-----------|---------|---------|----------|---------|
| 1     | 19.433    | 983422  | 56.666  | 40210957 | 48.131  |
| 2     | 28.328    | 752055  | 43.334  | 43334659 | 51.869  |
| Total |           | 1735478 | 100.000 | 83545616 | 100.000 |

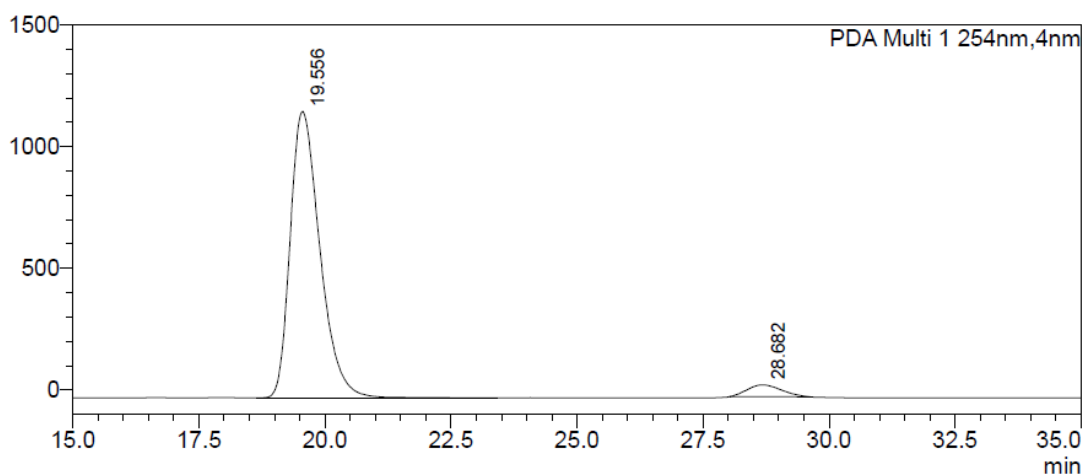

Peak Table

| Peak# | Ret. Time | Height  | Height% | Area     | Area%   |
|-------|-----------|---------|---------|----------|---------|
| 1     | 19.556    | 1177492 | 96.064  | 48331101 | 95.492  |
| 2     | 28.682    | 48239   | 3.936   | 2281423  | 4.508   |
| Total |           | 1225731 | 100.000 | 50612524 | 100.000 |

**tert-butyl(R)-4-((S)-1-ethoxy-1-oxopropan-2-yl)-2-(m-tolyl)-2H-benzo[4,5]thiazolo[3,2-a]pyrimidine-3-carboxylate (3f)**

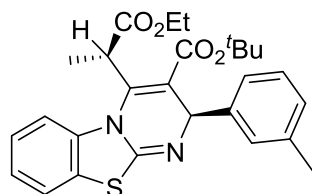

White foam, (43.0 mg), 90% yield;  $[\alpha]_D^{25} = +33.2$  (*c* 0.60, CHCl<sub>3</sub>); <sup>1</sup>H NMR (400 MHz, CDCl<sub>3</sub>) δ 7.34 (d, *J* = 8.0 Hz, 1H), 7.24 (s, 1H), 7.20-7.09 (m, 5H), 7.03 (d, *J* =

7.3 Hz, 1H), 5.89 (s, 1H), 4.31-4.21 (m, 3H), 2.30 (s, 3H), 1.49 (d,  $J = 6.9$  Hz, 3H), 1.40 (s, 9H), 1.29 (t,  $J = 7.1$  Hz, 3H).  $^{13}\text{C}$  NMR (100 MHz,  $\text{CDCl}_3$ )  $\delta$  171.7, 165.1, 157.7, 146.9, 141.7, 138.2, 135.9, 128.5, 128.4, 128.1, 125.9, 125.3, 124.7, 124.0, 123.1, 115.2, 110.9, 81.8, 61.8, 61.6, 39.4, 28.2, 21.8, 16.4, 14.5. HRMS (ESI)  $m/z$  calcd for  $\text{C}_{27}\text{H}_{30}\text{N}_2\text{O}_4\text{S} [\text{M}+\text{Na}]^+$  = 501.1824, found = 501.1822; The ee value was 86%,  $t_{\text{R}}$  (major) = 24.3 min,  $t_{\text{R}}$  (minor) = 26.9 min (Chiralcel IC,  $\lambda = 254$  nm, 5% *i*-PrOH/hexanes, flow rate = 1.0 mL/min).

mAU

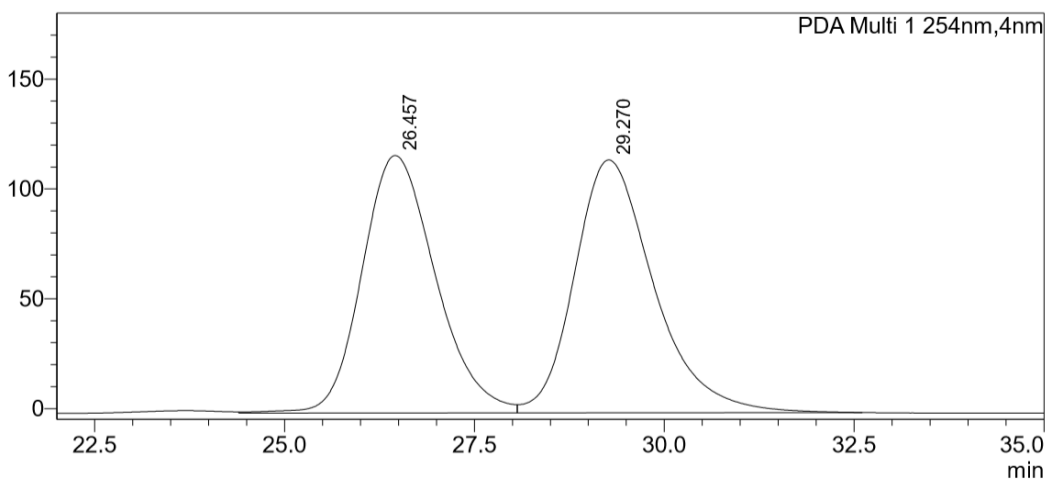

Peak Table

| PDA Ch1 254nm |           |        |         |          |         |
|---------------|-----------|--------|---------|----------|---------|
| Peak#         | Ret. Time | Height | Height% | Area     | Area%   |
| 1             | 26.457    | 117200 | 50.441  | 7892729  | 48.560  |
| 2             | 29.270    | 115149 | 49.559  | 8360974  | 51.440  |
| Total         |           | 232348 | 100.000 | 16253703 | 100.000 |

mAU

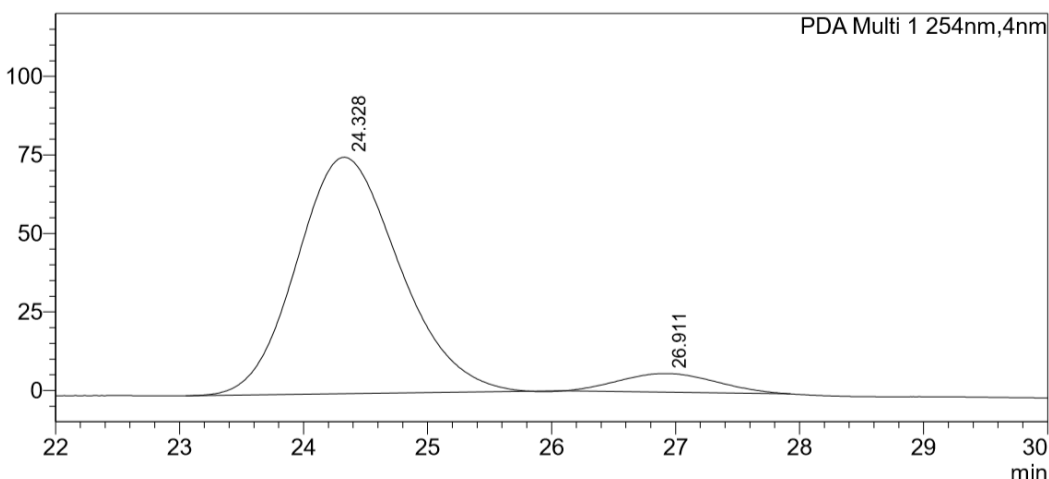

Peak Table

| PDA Ch1 254nm |           |        |         |         |         |  |
|---------------|-----------|--------|---------|---------|---------|--|
| Peak#         | Ret. Time | Height | Height% | Area    | Area%   |  |
| 1             | 24.328    | 75293  | 92.657  | 4337639 | 92.988  |  |
| 2             | 26.911    | 5967   | 7.343   | 327116  | 7.012   |  |
| Total         |           | 81260  | 100.000 | 4664754 | 100.000 |  |

**tert-butyl(R)-4-((S)-1-ethoxy-1-oxopropan-2-yl)-2-(o-tolyl)-2H-benzo[4,5]thiazolo[3,2-a]pyrimidine-3-carboxylate (3g)**

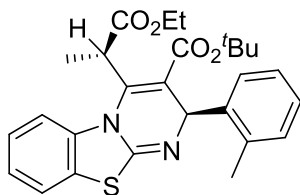

White foam, (36.8 mg), 77% yield;  $[\alpha]_D^{25} = +96.8$  ( $c$  0.47,  $\text{CHCl}_3$ );  $^1\text{H}$  NMR (400 MHz,  $\text{CDCl}_3$ )  $\delta$  7.36 (d,  $J = 7.6$  Hz, 1H), 7.31 (dd,  $J = 8.0, 4.0$  Hz, 1H), 7.24-7.22 m, 1H), 7.19-7.07 (m, 5H), 6.04 (s, 1H), 4.38-4.29 (m, 3H), 2.62 (s, 3H), 1.53 (d,  $J = 6.9$  Hz, 3H), 1.36 (t,  $J = 7.2$  Hz, 3H), 1.31 (s, 9H).  $^{13}\text{C}$  NMR (100 MHz,  $\text{CDCl}_3$ )  $\delta$  171.3, 164.8, 160.8, 158.4, 157.0, 146.6, 141.5, 132.0, 128.4, 127.4, 126.9, 115.5 (d,  $J = 9.0$  Hz), 112.7, 112.4, 110.5, 110.4, 110.2, 81.6, 61.8, 61.4, 39.1, 28.0, 16.1, 14.2. HRMS (ESI)  $m/z$  calcd for  $\text{C}_{27}\text{H}_{30}\text{N}_2\text{O}_4\text{S}$   $[\text{M}+\text{Na}]^+ = 501.1824$ , found = 501.1820; The ee value was 86%,  $t_R$  (major) = 16.1 min,  $t_R$  (minor) = 26.1 min (Chiralcel IC,  $\lambda = 254$  nm, 2% *i*-PrOH/hexanes, flow rate = 1.0 mL/min).

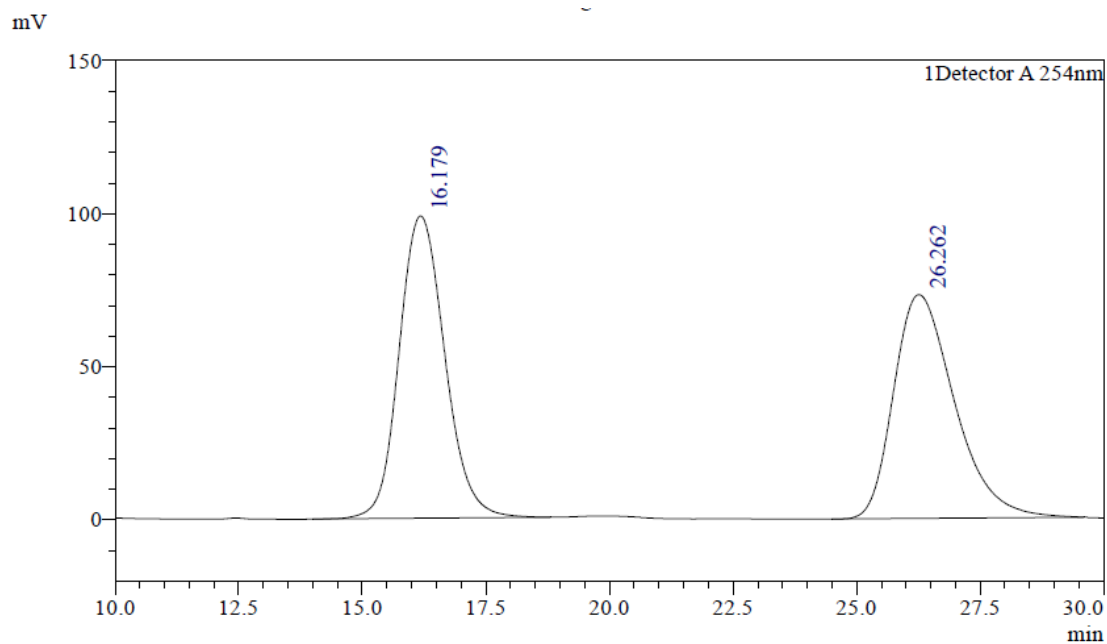

Peak Table

| Detector A 254nm |           |        |         |          |         |
|------------------|-----------|--------|---------|----------|---------|
| Peak#            | Ret. Time | Height | Height% | Area     | Area%   |
| 1                | 16.179    | 98772  | 57.460  | 6365696  | 50.384  |
| 2                | 26.262    | 73126  | 42.540  | 6268787  | 49.616  |
| Total            |           | 171897 | 100.000 | 12634483 | 100.000 |

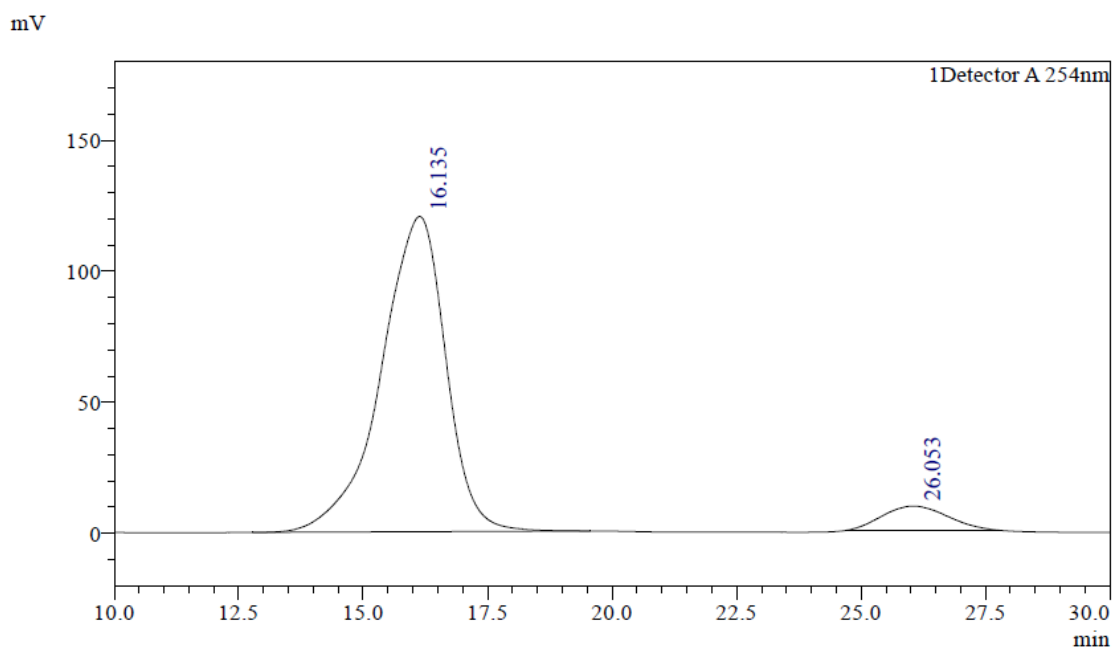

Peak Table

| Detector A 254nm |           |        |         |          |         |
|------------------|-----------|--------|---------|----------|---------|
| Peak#            | Ret. Time | Height | Height% | Area     | Area%   |
| 1                | 16.135    | 120354 | 92.936  | 10896037 | 92.902  |
| 2                | 26.053    | 9149   | 7.064   | 832464   | 7.098   |
| Total            |           | 129502 | 100.000 | 11728501 | 100.000 |

**tert-butyl(R)-4-((S)-1-ethoxy-1-oxopropan-2-yl)-2-(2-methoxyphenyl)-2H-benzo[4,5]thiazolo[3,2-a]pyrimidine-3-carboxylate (3h)**

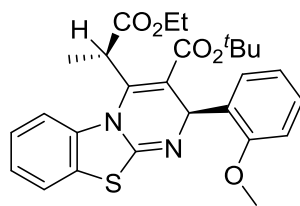

White foam, (36.5 mg), 74% yield;  $[\alpha]_D^{25} = +148.8$  ( $c$  0.35,  $\text{CHCl}_3$ );  $^1\text{H}$  NMR (400 MHz,  $\text{CDCl}_3$ )  $\delta$  7.32 (td,  $J = 8.0, 1.4$  Hz, 2H), 7.24-7.15 (m, 3H), 7.09 (td,  $J = 7.5, 1.2$  Hz, 1H), 6.89 (d,  $J = 7.8$  Hz, 1H), 6.82 (td,  $J = 7.5, 0.8$  Hz, 1H), 6.24 (s, 1H), 4.30-4.26 (m, 3H), 3.88 (s, 3H), 1.52 (d,  $J = 6.9$  Hz, 3H), 1.31 (s, 9H).  $^{13}\text{C}$  NMR (100 MHz,  $\text{CDCl}_3$ )  $\delta$  171.8, 164.9, 157.5, 147.2, 135.9, 129.5, 129.0, 128.2, 125.8, 125.4, 124.4, 123.0, 120.7, 114.8, 114.1, 111.1, 81.3, 61.6, 57.1, 56.0, 39.4, 28.1, 27.2, 16.5, 14.5. HRMS (ESI)  $m/z$  calcd for  $\text{C}_{27}\text{H}_{30}\text{N}_2\text{O}_5\text{S}$   $[\text{M}+\text{Na}]^+ = 517.1773$ , found = 517.1772; The ee value was 84%,  $t_R$  (major) = 36.1 min,  $t_R$  (minor) = 28.9 min (Chiralcel IG,  $\lambda = 254$  nm, 12% *i*-PrOH/hexanes, flow rate = 1.0 mL/min).

mV

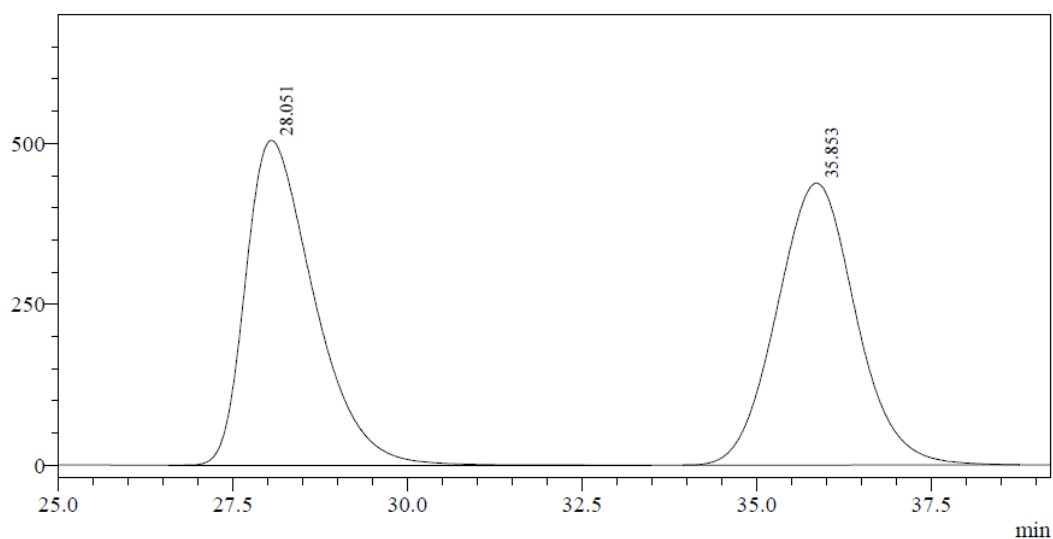

Peak Table

| Detector A 254nm |           |        |         |          |         |
|------------------|-----------|--------|---------|----------|---------|
| Peak#            | Ret. Time | Height | Height% | Area     | Area%   |
| 1                | 28.051    | 504884 | 53.550  | 34478374 | 50.008  |
| 2                | 35.853    | 437944 | 46.450  | 34467595 | 49.992  |
| Total            |           | 942828 | 100.000 | 68945969 | 100.000 |

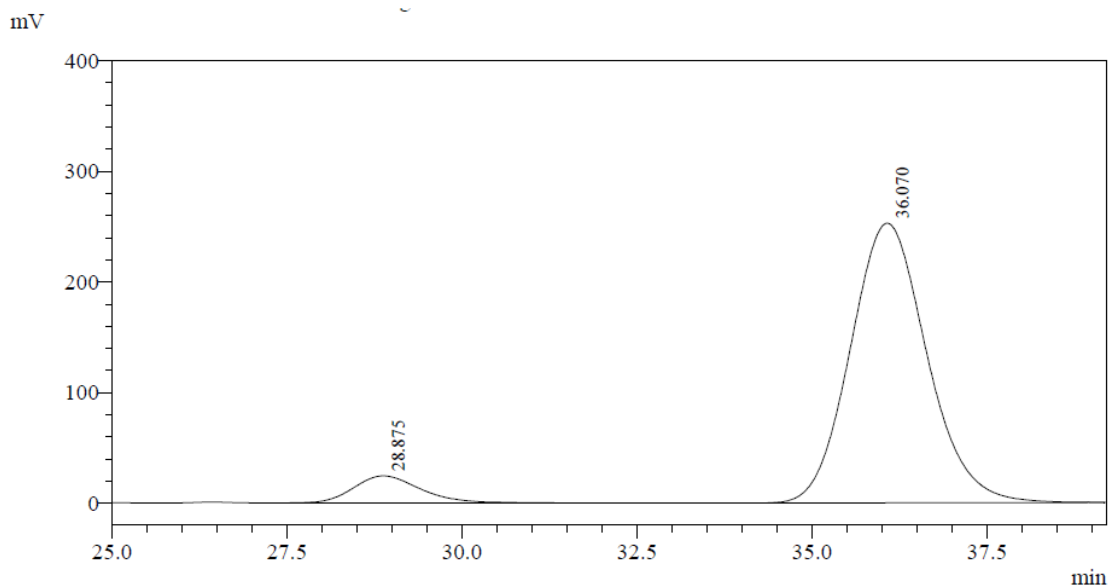

Peak Table

| Peak# | Ret. Time | Height | Height% | Area     | Area%   |
|-------|-----------|--------|---------|----------|---------|
| 1     | 28.875    | 24449  | 8.816   | 1638334  | 7.852   |
| 2     | 36.070    | 252881 | 91.184  | 19227982 | 92.148  |
| Total |           | 277330 | 100.000 | 20866316 | 100.000 |

**tert-butyl(R)-2-(3,4-dimethylphenyl)-4-((S)-1-ethoxy-1-oxopropan-2-yl)-2H-benzo[4,5]thiazolo[3,2-a]pyrimidine-3-carboxylate (3i)**

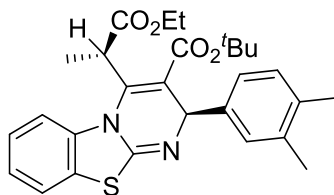

White foam, (38.4 mg), 78% yield;  $[\alpha]_D^{25} = +125.1$  (c 0.43,  $\text{CHCl}_3$ );  $^1\text{H}$  NMR (400 MHz,  $\text{CDCl}_3$ )  $\delta$  7.32 (dd,  $J = 7.6, 1.0$  Hz, 1H), 7.21-7.10 (m, 5H), 7.01 (d,  $J = 7.8$  Hz, 1H), 5.87 (s, 1H), 4.30-4.26 (m, 3H), 2.21 (s, 3H), 2.19 (s, 3H), 1.49 (d,  $J = 6.9$  Hz, 3H), 1.40 (s, 9H), 1.30 (t,  $J = 7.1$  Hz, 3H).  $^{13}\text{C}$  NMR (100 MHz,  $\text{CDCl}_3$ )  $\delta$  171.5, 164.9, 157.3, 146.6, 138.9, 136.5, 135.7, 135.6, 129.5, 128.5, 125.6, 125.1, 124.3, 124.0, 122.8, 114.9, 110.7, 81.5, 61.3, 61.2, 39.1, 28.0, 19.9, 19.4, 16.1, 14.3. HSRMS (ESI)  $m/z$  calcd for  $\text{C}_{28}\text{H}_{32}\text{N}_2\text{O}_4\text{S}$   $[\text{M}+\text{Na}]^+ = 515.1980$ , found = 515.1970; The ee value was 92%,  $t_R$  (major) = 29.8 min,  $t_R$  (minor) = 32.8 min (Chiralcel IE,  $\lambda = 254$  nm, 5% *i*-PrOH/hexanes, flow rate = 1.0 mL/min).

mV

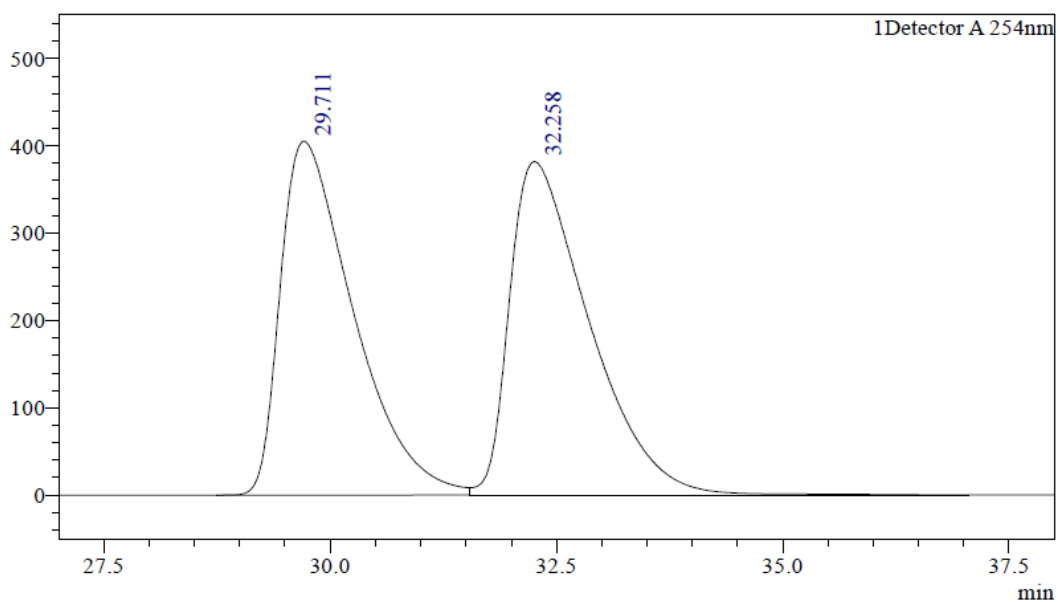

Peak Table

| Peak# | Ret. Time | Height | Height% | Area     | Area%   |
|-------|-----------|--------|---------|----------|---------|
| 1     | 29.711    | 405132 | 51.489  | 22788558 | 49.315  |
| 2     | 32.258    | 381708 | 48.511  | 23421377 | 50.685  |
| Total |           | 786840 | 100.000 | 46209935 | 100.000 |

mV

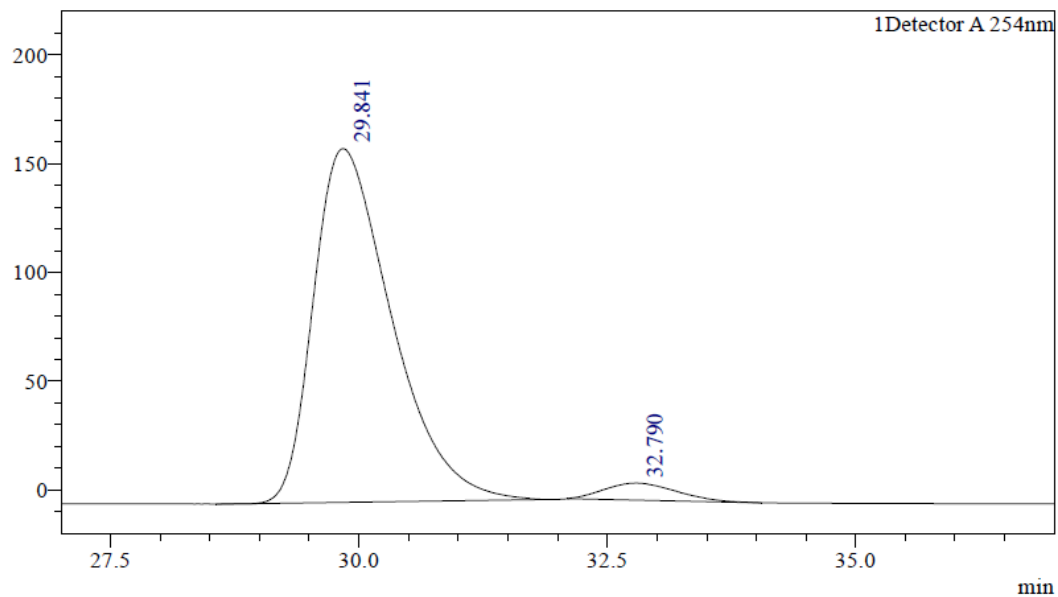

Peak Table

| Peak# | Ret. Time | Area    | Height | Height% | Area%   |
|-------|-----------|---------|--------|---------|---------|
| 1     | 29.841    | 8912493 | 162575 | 95.458  | 95.800  |
| 2     | 32.790    | 390752  | 7736   | 4.542   | 4.200   |
| Total |           | 9303245 | 170311 | 100.000 | 100.000 |

***tert*-butyl(*R*)-4-((*S*)-1-ethoxy-1-oxopropan-2-yl)-2-(thiophen-2-yl)-2*H*-benzo[4,5]thiazolo[3,2-*a*]pyrimidine-3-carboxylate (3j)**

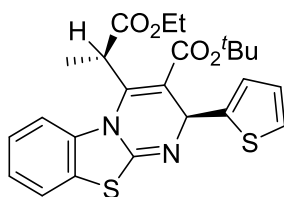

White foam, (42.3 mg), 90% yield;  $[\alpha]_D^{25} = +167.7$  ( $c$  0.45,  $\text{CHCl}_3$ );  $^1\text{H}$  NMR (400 MHz,  $\text{CDCl}_3$ )  $\delta$  7.37-7.35 (m, 1H), 7.21-7.11 (m, 4H), 6.97 (d,  $J = 3.5$  Hz, 1H), 6.86 (dd,  $J = 5.0, 3.6$  Hz, 1H), 6.12 (s, 1H), 4.36 (d,  $J = 5.7$  Hz, 1H), 4.21 (dd,  $J = 14.0, 7.0$  Hz, 2H), 1.48 (d,  $J = 6.9$  Hz, 3H), 1.46 (s, 9H), 1.24 (t,  $J = 7.1$  Hz, 3H).  $^{13}\text{C}$  NMR (100 MHz,  $\text{CDCl}_3$ )  $\delta$  171.3, 164.2, 158.9, 147.1, 145.4, 135.5, 126.3, 125.7, 125.0, 124.6, 124.5, 124.1, 122.9, 115.2, 110.8, 81.8, 61.4, 57.2, 39.1, 28.0, 16.1, 14.2. HRMS (ESI)  $m/z$  calcd for  $\text{C}_{24}\text{H}_{26}\text{N}_2\text{O}_4\text{S}_2$   $[\text{M}+\text{Na}]^+ = 493.1232$ , found = 493.1223; The ee value was 88%,  $t_R$  (major) = 14.8 min,  $t_R$  (minor) = 17.3 min (Chiralcel IC,  $\lambda = 254$  nm, 10% *i*-PrOH/hexanes, flow rate = 1.0 mL/min).

mV

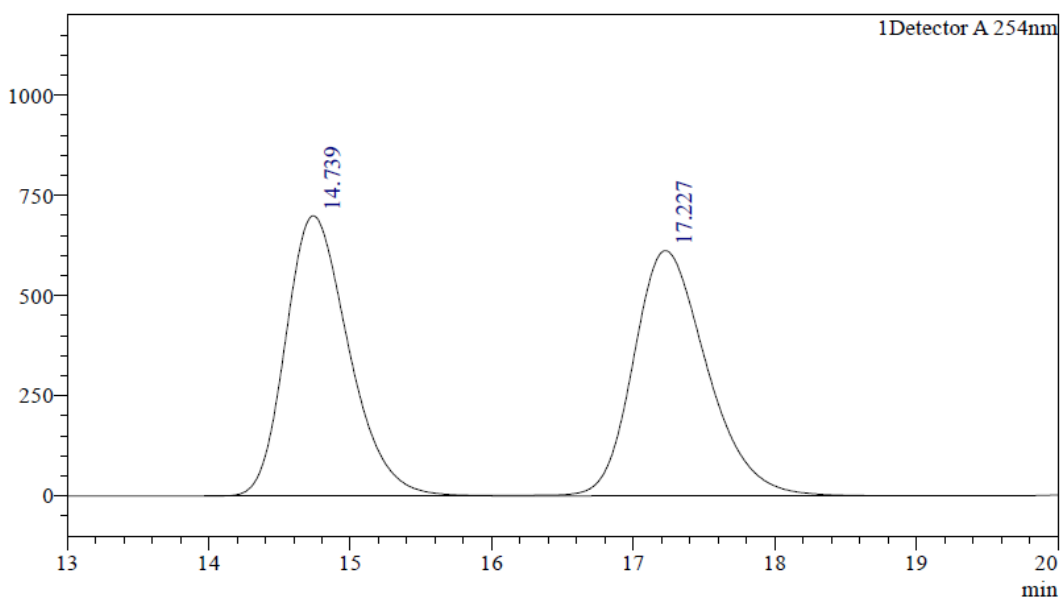

Peak Table

| Peak# | Ret. Time | Height  | Height% | Area     | Area%   |
|-------|-----------|---------|---------|----------|---------|
| 1     | 14.739    | 698608  | 53.321  | 21624621 | 49.446  |
| 2     | 17.227    | 611597  | 46.679  | 22109499 | 50.554  |
| Total |           | 1310205 | 100.000 | 43734120 | 100.000 |



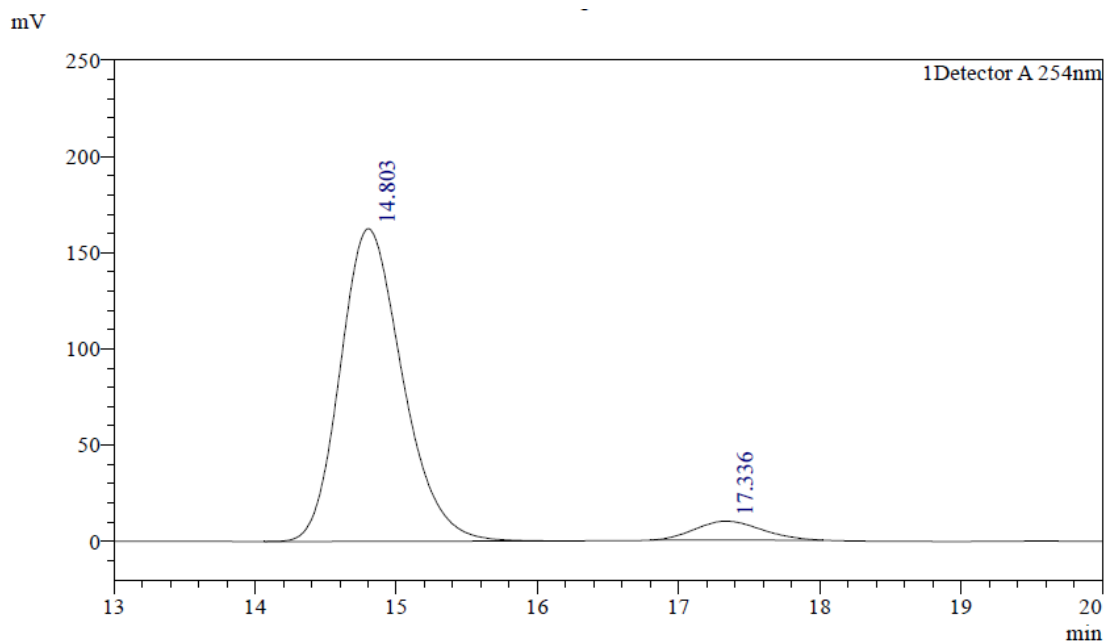

Peak Table

| Peak# | Ret. Time | Height | Height% | Area    | Area%   |
|-------|-----------|--------|---------|---------|---------|
| 1     | 14.803    | 162275 | 94.307  | 4966967 | 93.902  |
| 2     | 17.336    | 9797   | 5.693   | 322564  | 6.098   |
| Total |           | 172072 | 100.000 | 5289531 | 100.000 |

**tert-butyl(R)-4-((S)-1-ethoxy-1-oxopropan-2-yl)-8-fluoro-2-phenyl-2H-benzo[4,5]thiazolo[3,2-a]pyrimidine-3-carboxylate (3k)**

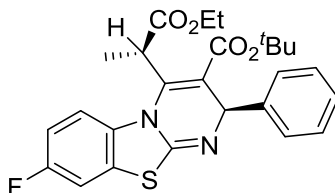

White foam, (44.8 mg), 93% yield;  $[\alpha]_D^{25} = +191.2$  (*c* 0.50,  $\text{CHCl}_3$ );  $^1\text{H}$  NMR (400 MHz,  $\text{CDCl}_3$ )  $\delta$  7.40-7.38 (m, 2H), 7.28-7.26 (m, 1H), 7.24-7.18 (m, 2H), 7.08 (ddd,  $J = 10.3, 8.3, 3.5$  Hz, 2H), 6.86 (td,  $J = 8.7, 2.7$  Hz, 1H), 5.90 (s, 1H), 4.29-4.19 (m, 3H), 1.48 (d,  $J = 6.9$  Hz, 3H), 1.38 (s, 9H), 1.28 (t,  $J = 7.2$  Hz, 4H).  $^{13}\text{C}$  NMR (100 MHz,  $\text{CDCl}_3$ )  $\delta$  171.5, 165.0, 161.1, 158.0 (d,  $J = 118$  Hz), 146.9, 141.6, 132.2, 128.7, 127.7, 127.1, 127.0 (d,  $J = 98.1$  Hz), 115.8 (d,  $J = 8.0$  Hz), 112.9 (d,  $J = 240.0$  Hz), 110.7, 110.5, 81.9, 61.9, 61.7, 39.4, 28.2, 16.3, 14.4. HRMS (ESI)  $m/z$  calcd for  $\text{C}_{27}\text{H}_{31}\text{FN}_2\text{O}_4\text{S} [\text{M}+\text{Na}]^+ = 505.1573$ , found = 505.1571; The ee value was 90%,  $t_R$  (major) = 21.3 min,  $t_R$  (minor) = 26.0 min (Chiralcel IC,  $\lambda = 254$  nm, 5% *i*-PrOH/hexanes, flow rate = 0.5 mL/min).

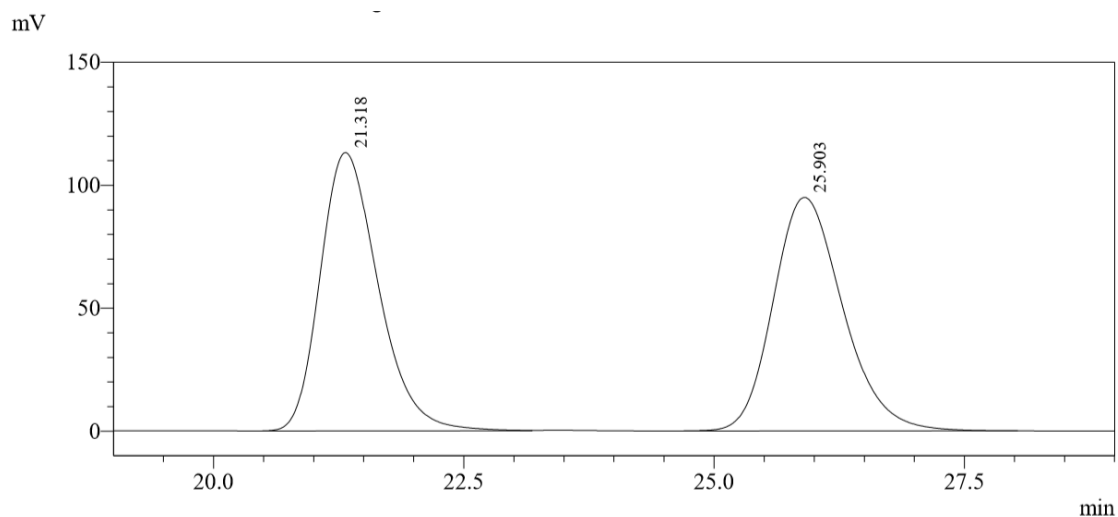

Peak Table

| Peak# | Ret. Time | Height | Height% | Area    | Area%   |
|-------|-----------|--------|---------|---------|---------|
| 1     | 21.318    | 113146 | 54.377  | 4566190 | 49.847  |
| 2     | 25.903    | 94930  | 45.623  | 4594284 | 50.153  |
| Total |           | 208076 | 100.000 | 9160475 | 100.000 |

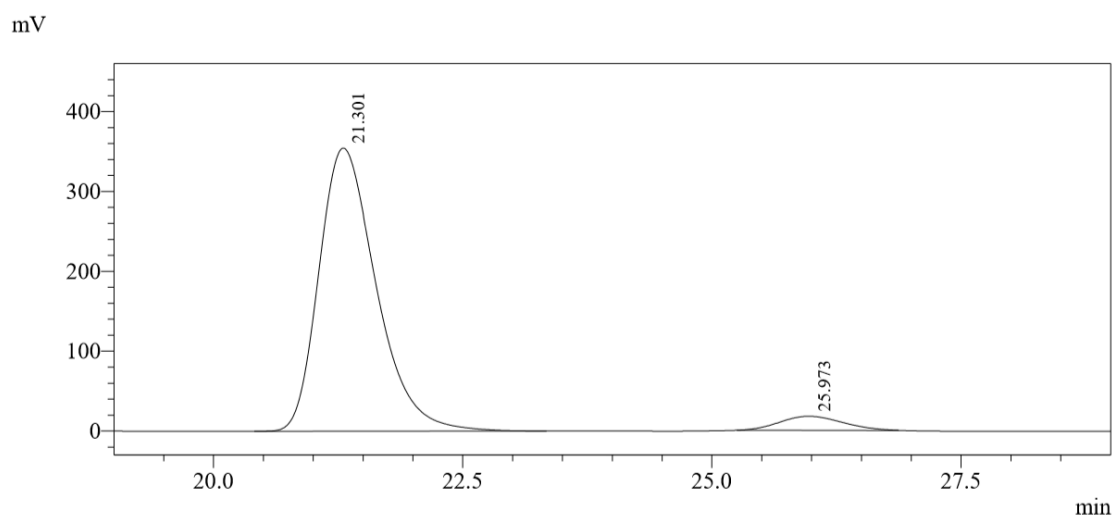

Peak Table

| Peak# | Ret. Time | Height | Height% | Area     | Area%   |
|-------|-----------|--------|---------|----------|---------|
| 1     | 21.301    | 354474 | 95.273  | 14121367 | 94.813  |
| 2     | 25.973    | 17588  | 4.727   | 772521   | 5.187   |
| Total |           | 372061 | 100.000 | 14893888 | 100.000 |

**tert-butyl(R)-4-((S)-1-ethoxy-1-oxopropan-2-yl)-8-methoxy-2-phenyl-2H-benzo[4,5]thiazolo[3,2-a]pyrimidine-3-carboxylate (3l)**

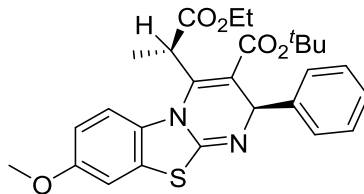

White foam, (45.0 mg), 91% yield;  $[\alpha]_D^{25} = +87.6$  (*c* 0.50, CHCl<sub>3</sub>); <sup>1</sup>H NMR (400 MHz, CDCl<sub>3</sub>) δ 7.41 (d, *J* = 7.3 Hz, 2H), 7.29-7.19 (m, 3H), 7.08 (d, *J* = 8.9 Hz, 1H),

6.90 (d,  $J = 2.6$  Hz, 1H), 6.70 (dd,  $J = 8.9, 2.6$  Hz, 1H), 5.91 (s, 1H), 4.32-4.21 (m, 3H), 3.78 (s, 3H), 1.49 (d,  $J = 6.9$  Hz, 3H), 1.39 (s, 9H), 1.29 (t,  $J = 7.2$  Hz, 3H).  $^{13}\text{C}$  NMR (100 MHz,  $\text{CDCl}_3$ )  $\delta$  171.5, 164.9, 161.5, 157.0, 147.1, 141.6, 129.4, 128.4, 127.3, 126.9, 126.5, 115.8, 111.5, 109.5, 108.5, 81.4, 61.3, 55.8, 39.1, 31.6, 28.0, 22.7, 16.0, 14.2. HRMS (ESI)  $m/z$  calcd for  $\text{C}_{27}\text{H}_{30}\text{N}_2\text{O}_5\text{S} [\text{M}+\text{Na}]^+ = 517.1773$ , found = 517.1754; The ee value was 91%,  $t_R$  (major) = 15.7 min,  $t_R$  (minor) = 26.7 min (Chiralcel IC,  $\lambda = 254$  nm, 10% *i*-PrOH/hexanes, flow rate = 1.0 mL/min).

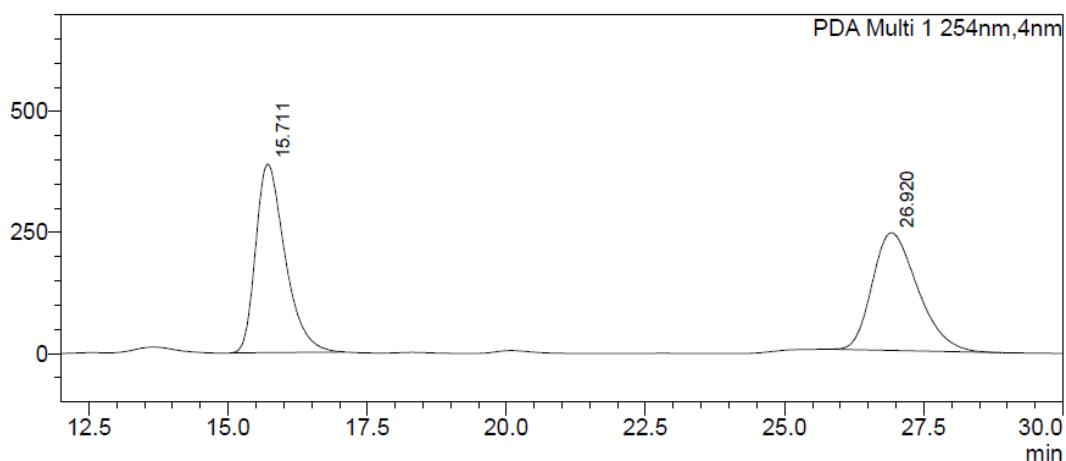

Peak Table

PDA Ch1 254nm

| Peak# | Ret. Time | Height | Height% | Area     | Area%   |
|-------|-----------|--------|---------|----------|---------|
| 1     | 15.711    | 389633 | 61.574  | 14321161 | 50.871  |
| 2     | 26.920    | 243150 | 38.426  | 13830537 | 49.129  |
| Total |           | 632784 | 100.000 | 28151698 | 100.000 |

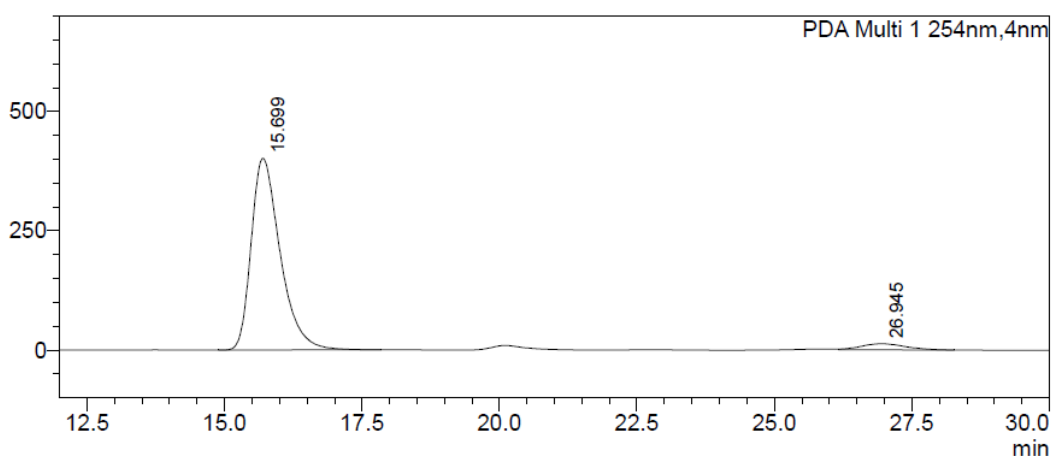

Peak Table

PDA Ch1 254nm

| Peak# | Ret. Time | Height | Height% | Area     | Area%   |
|-------|-----------|--------|---------|----------|---------|
| 1     | 15.699    | 402206 | 96.871  | 14750116 | 95.360  |
| 2     | 26.945    | 12991  | 3.129   | 717726   | 4.640   |
| Total |           | 415198 | 100.000 | 15467842 | 100.000 |

**tert-butyl(R)-5-((S)-1-ethoxy-1-oxopropan-2-yl)-7-phenyl-7H-thiazolo[3,2-a]pyrimidine-6-carboxylate (3m)**

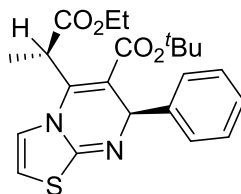

Light yellow solid, (37.7 mg), 91% yield;  $[\alpha]_D^{25} = +54.0$  ( $c$  0.50,  $\text{CHCl}_3$ );  $^1\text{H}$  NMR (400 MHz,  $\text{CDCl}_3$ )  $\delta$  7.43 (d,  $J = 7.2$  Hz, 2H), 7.34-7.30 (m, 3H), 6.44 (d,  $J = 5.3$  Hz, 1H), 5.88 (d,  $J = 5.2$  Hz, 1H), 5.70 (s, 1H), 4.32-4.25 (m, 1H), 4.24-4.19 (m, 1H), 1.62 (s, 2H), 1.45 (t,  $J = 6.0$  Hz, 3H), 1.34 (d,  $J = 7.2$  Hz, 3H), 1.31 (s, 9H).  $^{13}\text{C}$  NMR (100 MHz,  $\text{CDCl}_3$ )  $\delta$  172.8, 165.9, 156.9, 144.7, 143.4, 128.7, 127.6, 127.4, 121.3, 105.7, 102.2, 81.8, 62.1, 62.0, 38.3, 28.2, 14.4, 13.8. HRMS (ESI)  $m/z$  calcd for  $\text{C}_{22}\text{H}_{26}\text{N}_2\text{O}_4\text{S}$   $[\text{M}+\text{Na}]^+ = 437.1511$ , found = 437.1509; The ee value was 80%,  $t_R$  (major) = 10.3 min,  $t_R$  (minor) = 11.6 min (Chiralcel IC,  $\lambda = 254$  nm, 10% *i*-PrOH/hexanes, flow rate = 1.0 mL/min).

mV

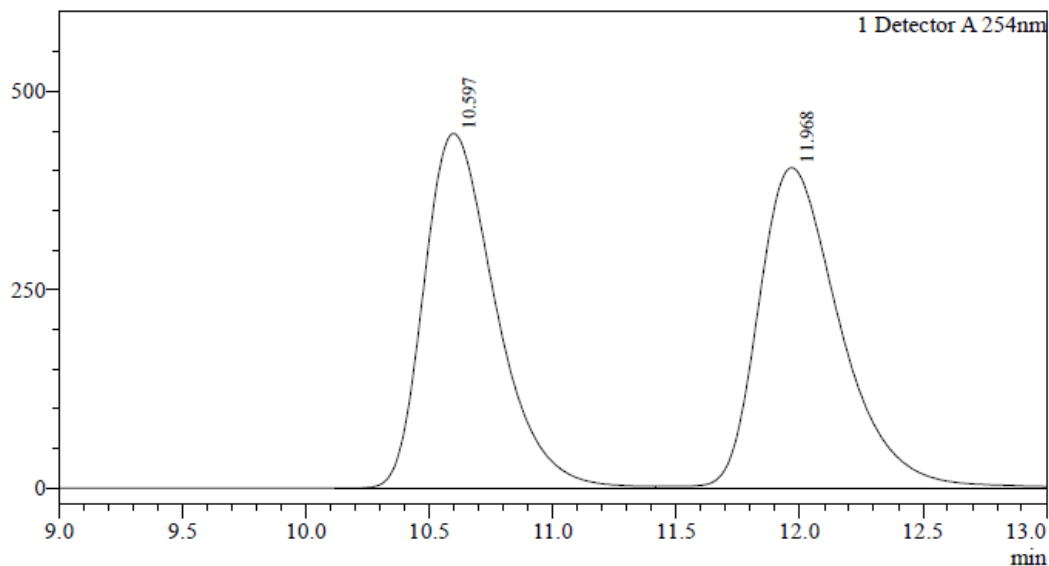

Peak Table

| Detector A 254nm |           |        |         |          |         |
|------------------|-----------|--------|---------|----------|---------|
| Peak#            | Ret. Time | Height | Height% | Area     | Area%   |
| 1                | 10.597    | 446871 | 52.537  | 9044646  | 49.252  |
| 2                | 11.968    | 403716 | 47.463  | 9319320  | 50.748  |
| Total            |           | 850586 | 100.000 | 18363966 | 100.000 |

mV

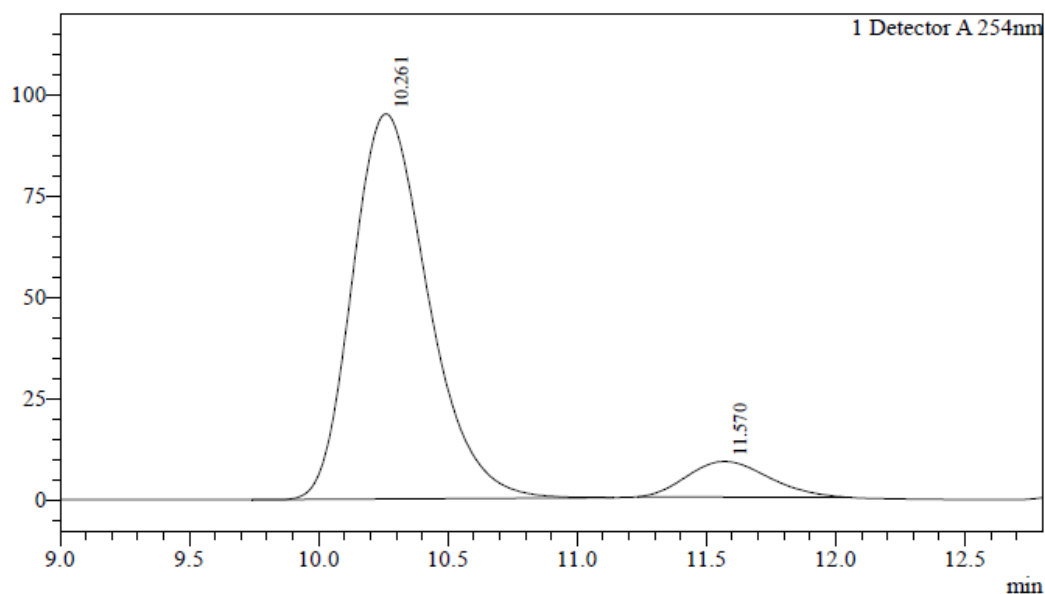

Peak Table

| Peak# | Ret. Time | Height | Height% | Area    | Area%   |
|-------|-----------|--------|---------|---------|---------|
| 1     | 10.261    | 94977  | 91.544  | 1940665 | 90.926  |
| 2     | 11.570    | 8774   | 8.456   | 193660  | 9.074   |
| Total |           | 103751 | 100.000 | 2134324 | 100.000 |

**tert-butyl(R)-4-((S)-1-ethoxy-1-oxobutan-2-yl)-2-phenyl-2H-benzo[4,5]thiazolo[3,2-a]pyrimidine-3-carboxylate (4a)**

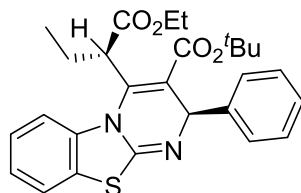

White foam, (42.5 mg), 89% yield;  $[\alpha]_D^{25} = +88.4$  ( $c$  0.45,  $\text{CHCl}_3$ );  $^1\text{H}$  NMR (400 MHz,  $\text{CDCl}_3$ )  $\delta$  7.36 (d,  $J = 7.3$  Hz, 2H), 7.26 (d,  $J = 7.5$  Hz, 1H), 7.21-7.17 (m, 2H), 7.15-7.11 (m, 1H), 7.10-7.08 (m, 2H), 7.07-7.01 (m, 1H), 5.89 (s, 1H), 4.29- 4.18 (m, 2H), 3.98 (d,  $J = 5.4$  Hz, 1H), 2.21-2.14 (m, 1H), 1.89-1.81 (m, 1H), 1.34 (s, 1H), 1.32 (s, 9H), 1.26 (t,  $J = 7.2$  Hz, 3H), 0.58 (t,  $J = 7.5$  Hz, 3H).  $^{13}\text{C}$  NMR (100 MHz,  $\text{CDCl}_3$ )  $\delta$  171.2, 164.9, 157.5, 146.4, 141.7, 135.9, 128.6, 127.5, 127.2, 125.8, 125.43, 124.7, 123.1, 115.7, 110.8, 81.7, 62.0, 61.4, 46.7, 28.2, 24.7, 14.5, 11.9. HRMS (ESI)  $m/z$  calcd for  $\text{C}_{27}\text{H}_{30}\text{N}_2\text{O}_5\text{S}$   $[\text{M}+\text{Na}]^+ = 501.1824$ , found = 501.1820; The ee value was 90%,  $t_R$  (major) = 50.5 min,  $t_R$  (minor) = 56.9 min (Chiralcel IC,  $\lambda = 254$  nm, 10% *i*-PrOH/hexanes, flow rate = 1.0 mL/min).

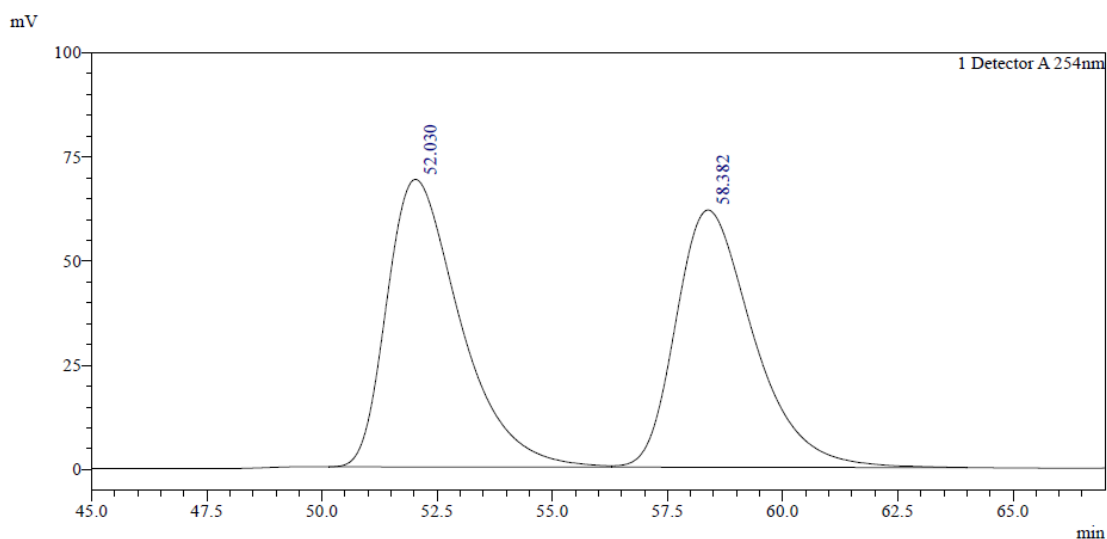

Peak Table

| Detector A 254nm |           |          |        |         |         |
|------------------|-----------|----------|--------|---------|---------|
| Peak#            | Ret. Time | Area     | Height | Height% | Area%   |
| 1                | 52.030    | 7655227  | 68987  | 52.796  | 51.397  |
| 2                | 58.382    | 7238949  | 61679  | 47.204  | 48.603  |
| Total            |           | 14894176 | 130666 | 100.000 | 100.000 |

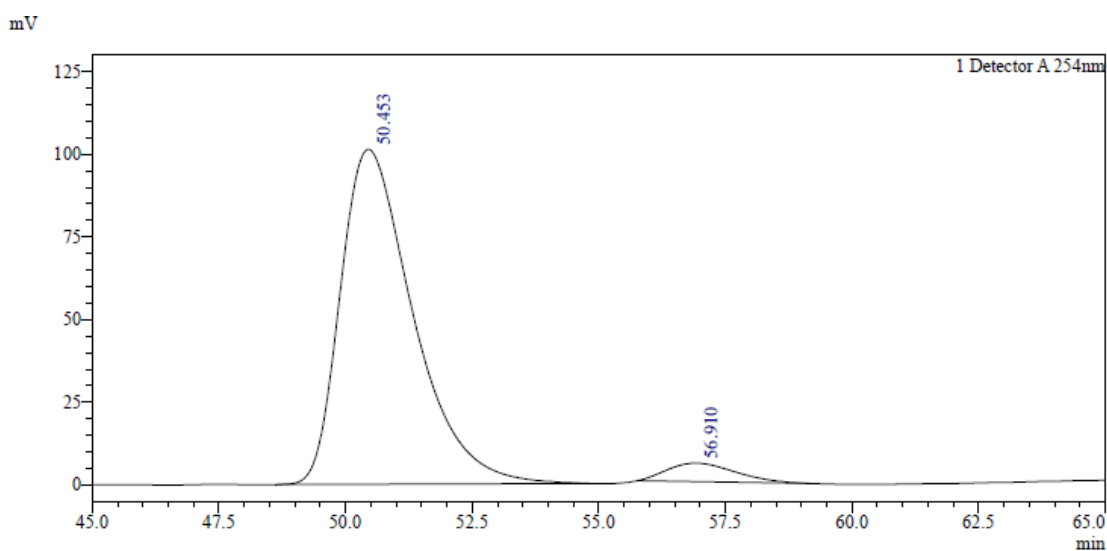

Peak Table

| Detector A 254nm |           |          |        |         |         |
|------------------|-----------|----------|--------|---------|---------|
| Peak#            | Ret. Time | Area     | Height | Height% | Area%   |
| 1                | 50.453    | 10110645 | 101359 | 94.737  | 95.008  |
| 2                | 56.910    | 531262   | 5631   | 5.263   | 4.992   |
| Total            |           | 10641907 | 106990 | 100.000 | 100.000 |

***tert*-butyl(*R*)-4-((*S*)-1-ethoxy-1-oxohexan-2-yl)-2-phenyl-2*H*-benzo[4,5]thiazolo[3,2-*a*]pyrimidine-3-carboxylate (4b)**

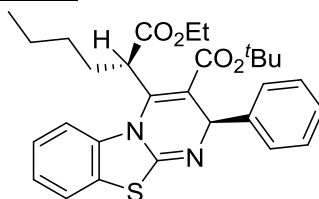

White foam, (48.0 mg), 92% yield;  $[\alpha]_D^{25} = +138.1$  (*c* 0.40,  $\text{CHCl}_3$ );  $^1\text{H NMR}$  (400

MHz, CDCl<sub>3</sub>) δ 7.44 (d, *J* = 7.6 Hz, 2H), 7.36 (d, *J* = 7.2 Hz, 1H), 7.29-7.18 (m, 3H), 7.19-7.11 (m, 3H), 5.97 (s, 1H), 4.51 (dd, *J* = 10.8, 4.2 Hz, 1H), 4.40-4.28 (m, 2H), 4.10 (dd, *J* = 13.6, 4.2 Hz, 1H), 2.22-2.15 (m, 1H), 1.96-1.86 (m, 1H), 1.40 (s, 9H), 1.34 (t, *J* = 7.2 Hz, 3H), 1.09-0.99 (m, 3H), 0.90-0.84 (m, 1H), 0.73 (t, *J* = 7.2 Hz, 3H); <sup>13</sup>C NMR (100 MHz, CDCl<sub>3</sub>) δ 171.2, 164.7, 157.5, 146.2, 141.1, 135.6, 128.4, 127.4, 127.0, 125.7, 125.2, 124.6, 122.9, 115.4, 81.6, 61.5, 61.3, 44.7, 30.8, 29.1, 28.0, 22.2, 14.3, 13.7. HRMS (ESI) *m/z* calcd for C<sub>29</sub>H<sub>34</sub>N<sub>2</sub>O<sub>4</sub>S [M+Na]<sup>+</sup> = 529.2173, found = 529.2135; The ee value was 87%, *t<sub>R</sub>* (major) = 35.6 min, *t<sub>R</sub>* (minor) = 40.0 min (Chiralcel IC, λ = 254 nm, 2% *i*-PrOH/hexanes, flow rate = 0.5 mL/min).

mV

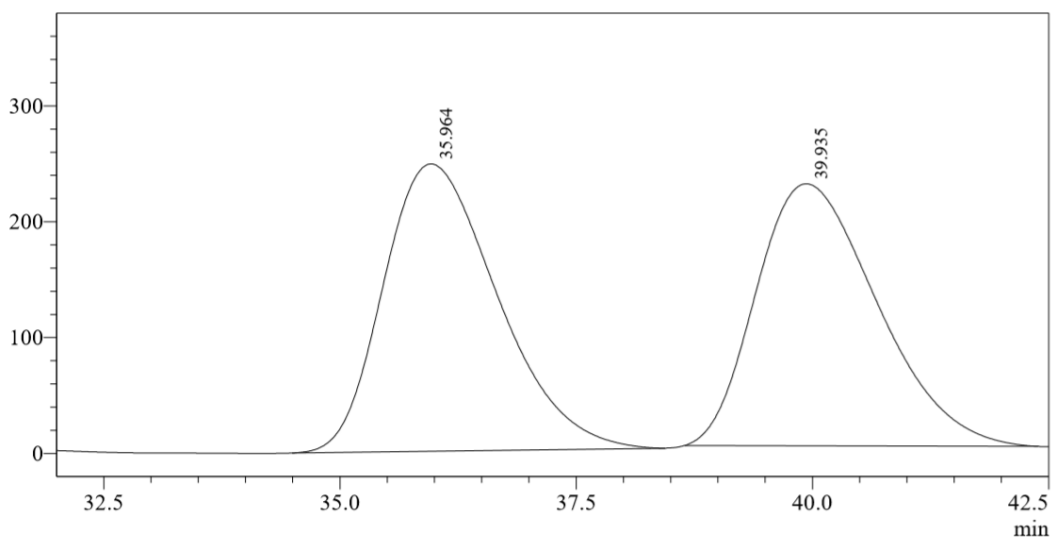

Peak Table

| Detector A 254nm |           |        |         |          |         |
|------------------|-----------|--------|---------|----------|---------|
| Peak#            | Ret. Time | Height | Height% | Area     | Area%   |
| 1                | 35.964    | 247993 | 52.301  | 20817849 | 50.820  |
| 2                | 39.935    | 226171 | 47.699  | 20145640 | 49.180  |
| Total            |           | 474164 | 100.000 | 40963489 | 100.000 |

mV

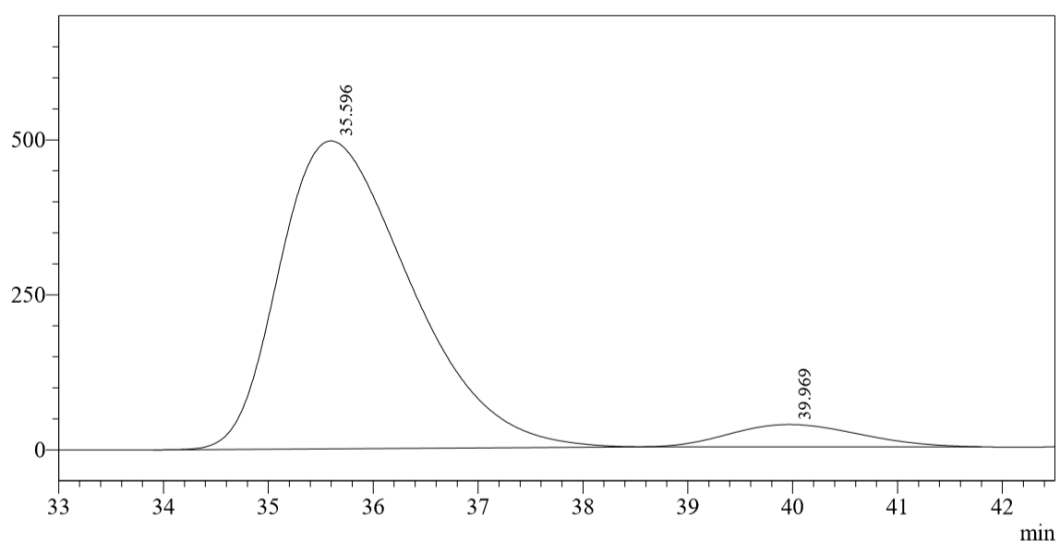

Peak Table

| Detector A 254nm |           |        |         |          |         |
|------------------|-----------|--------|---------|----------|---------|
| Peak#            | Ret. Time | Height | Height% | Area     | Area%   |
| 1                | 35.596    | 496485 | 93.257  | 43148787 | 93.346  |
| 2                | 39.969    | 35899  | 6.743   | 3075884  | 6.654   |
| Total            |           | 532384 | 100.000 | 46224671 | 100.000 |

**tert-butyl(R)-4-((S)-1-ethoxy-1-oxoheptan-2-yl)-2-phenyl-2H-benzo[4,5]thiazolo[3,2-a]pyrimidine-3-carboxylate (4c)**

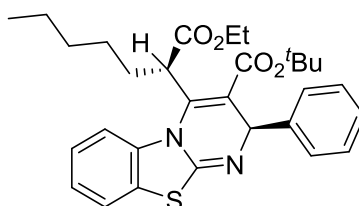

White foam, (47.3 mg), 91% yield;  $[\alpha]_D^{25} = +199.8$  (*c* 0.50, CHCl<sub>3</sub>); <sup>1</sup>H NMR (400 MHz, CDCl<sub>3</sub>) δ 7.43 (d, *J* = 7.2 Hz, 2H), 7.34 (d, *J* = 7.5 Hz, 1H), 7.29-7.25 (m, 2H), 7.22-7.20 (m, 1H), 7.19-7.16 (m, 2H), 7.14-7.09 (m, 1H), 5.96 (s, 1H), 4.39-4.26 (m, 2H), 4.10 (d, *J* = 5.8 Hz, 1H), 2.21-2.13 (m, 1H), 1.97-1.88 (m, 1H), 1.39 (s, 9H), 1.33 (t, *J* = 7.1 Hz, 3H), 1.16-1.07 (m, 3H), 0.99-0.88 (m, 3H), 0.71 (t, *J* = 7.3 Hz, 3H); <sup>13</sup>C NMR (100 MHz, CDCl<sub>3</sub>) δ 171.7, 165.2, 157.7, 146.8, 141.9, 136.2, 128.8, 127.7, 127.4, 126.0, 125.7, 124.9, 123.3, 115.8, 111.0, 81.9, 62.3, 61.70, 44.9, 31.6, 31.5, 28.4, 27.1, 22.8, 14.7, 14.3. HRMS (ESI) *m/z* calcd for C<sub>31</sub>H<sub>40</sub>N<sub>2</sub>O<sub>4</sub>S [M+H]<sup>+</sup> = 521.2474, found = 521.2467; The ee value was 89%, *t<sub>R</sub>* (major) = 114.8 min, *t<sub>R</sub>* (minor) = 98.6 min (Chiralcel IG, λ = 254 nm, 2% *i*-PrOH/hexanes, flow rate = 1.0 mL/min).



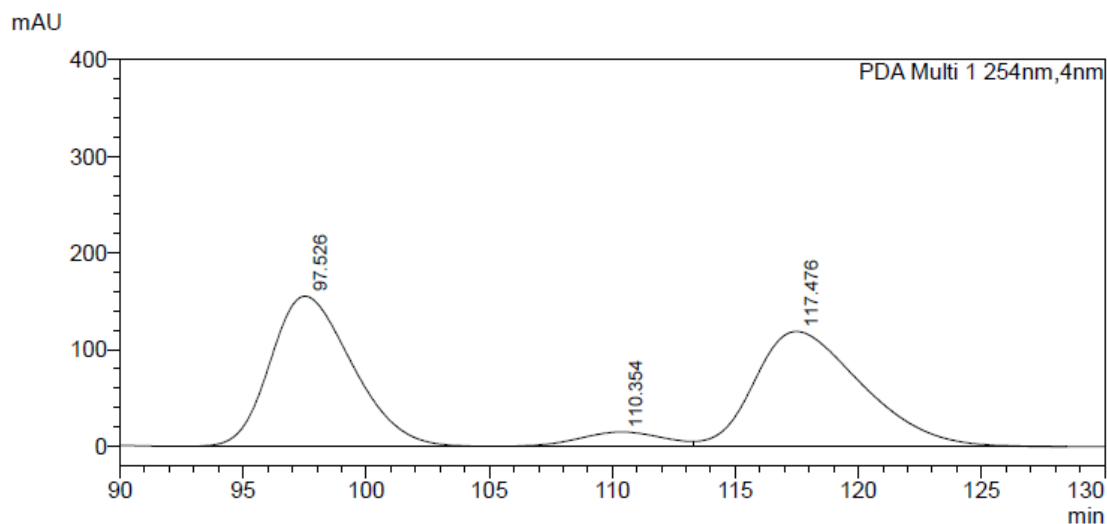

Peak Table

| Peak# | Ret. Time | Height | Height% | Area     | Area%   |
|-------|-----------|--------|---------|----------|---------|
| 1     | 97.526    | 155285 | 53.774  | 35877931 | 47.604  |
| 2     | 110.354   | 14644  | 5.071   | 3429293  | 4.550   |
| 3     | 117.476   | 118846 | 41.155  | 36059840 | 47.846  |
| Total |           | 288774 | 100.000 | 75367064 | 100.000 |

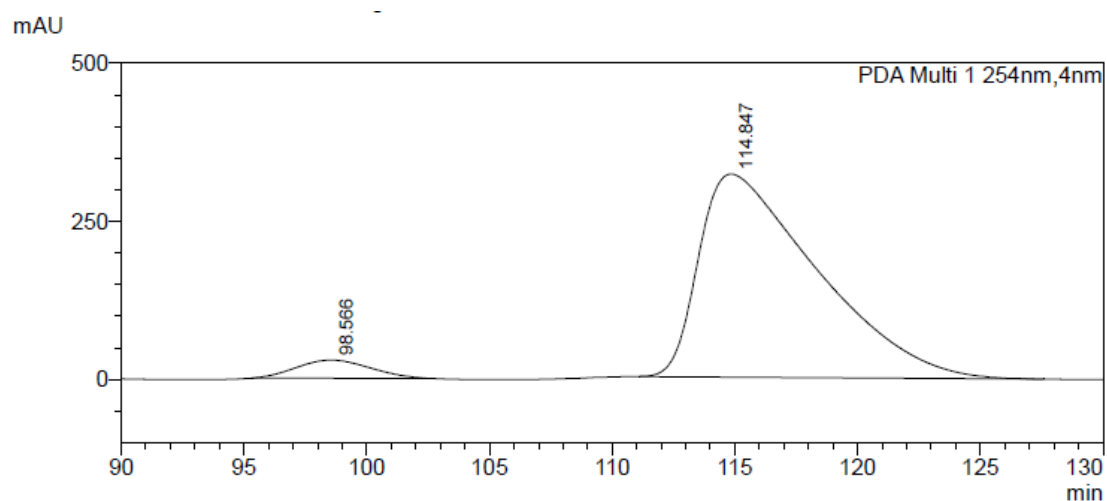

Peak Table

| Peak# | Ret. Time | Height | Height% | Area      | Area%   |
|-------|-----------|--------|---------|-----------|---------|
| 1     | 98.566    | 28785  | 8.227   | 6058249   | 5.338   |
| 2     | 114.847   | 321109 | 91.773  | 107440870 | 94.662  |
| Total |           | 349894 | 100.000 | 113499119 | 100.000 |

***tert*-butyl(*R*)-4-((*S*)-1-ethoxy-1-oxo-3-phenylpropan-2-yl)-2-phenyl-2*H*-benzo[4,5]thiazolo[3,2-*a*]pyrimidine-3-carboxylate (4d)**

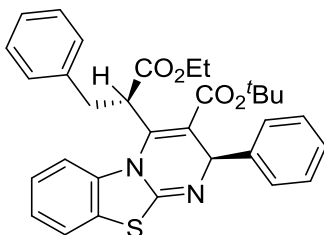

White foam, (47.5 mg), 88% yield;  $[\alpha]_D^{25} = +194.4$  ( $c$  0.40,  $\text{CHCl}_3$ );  $^1\text{H}$  NMR (400 MHz,  $\text{CDCl}_3$ )  $\delta$  7.38 (d,  $J = 7.2$  Hz, 2H), 7.26-7.15 (m, 3H), 7.15-7.07 (m, 3H), 7.06-7.00 (m, 4H), 6.81-6.71 (m, 2H), 5.94 (s, 1H), 4.51 (dd,  $J = 10.8, 4.2$  Hz, 1H), 4.46-4.28 (m, 2H), 3.55 (dd,  $J = 13.6, 4.2$  Hz, 1H), 3.11 (dd,  $J = 13.6, 10.9$  Hz, 1H), 1.47 (s, 9H), 1.37 (t,  $J = 7.2$  Hz, 3H);  $^{13}\text{C}$  NMR (100 MHz,  $\text{CDCl}_3$ )  $\delta$  170.60, 164.92, 157.0, 145.8, 141.5, 137.3, 135.3, 128.5, 128.3, 128.1, 127.2, 126.9, 126.7, 125.7, 125.0, 124.1, 122.4, 115.3, 110.5, 81.5, 61.5, 61.3, 45.9, 36.8, 28.1, 14.3. HRMS (ESI)  $m/z$  calcd for  $\text{C}_{32}\text{H}_{32}\text{N}_2\text{O}_4\text{S} [\text{M}+\text{Na}]^+ = 563.1980$ , found = 563.1980; The ee value was 82%,  $t_R$  (major) = 39.4 min,  $t_R$  (minor) = 31.5 min (Chiralcel IE,  $\lambda = 254$  nm, 5% *i*-PrOH/hexanes, flow rate = 1.0 mL/min).

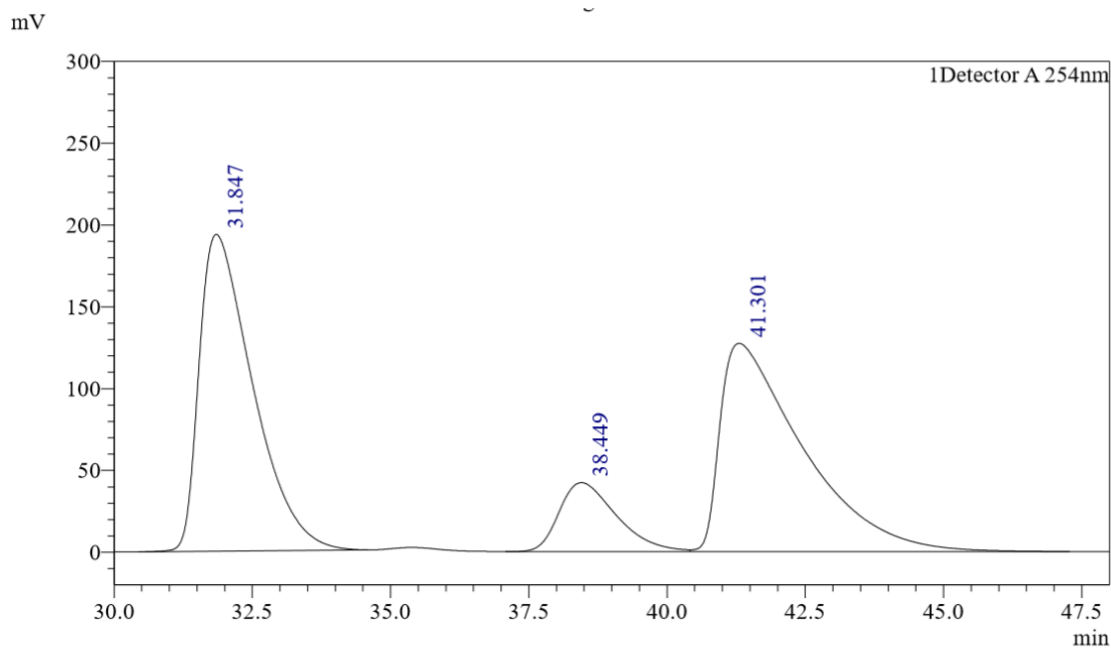

Peak Table

| Detector A 254nm |           |        |         |          |         |
|------------------|-----------|--------|---------|----------|---------|
| Peak#            | Ret. Time | Height | Height% | Area     | Area%   |
| 1                | 31.847    | 193597 | 53.330  | 13049612 | 44.539  |
| 2                | 38.449    | 42125  | 11.604  | 3033857  | 10.355  |
| 3                | 41.301    | 127293 | 35.065  | 13216045 | 45.107  |
| Total            |           | 363015 | 100.000 | 29299514 | 100.000 |

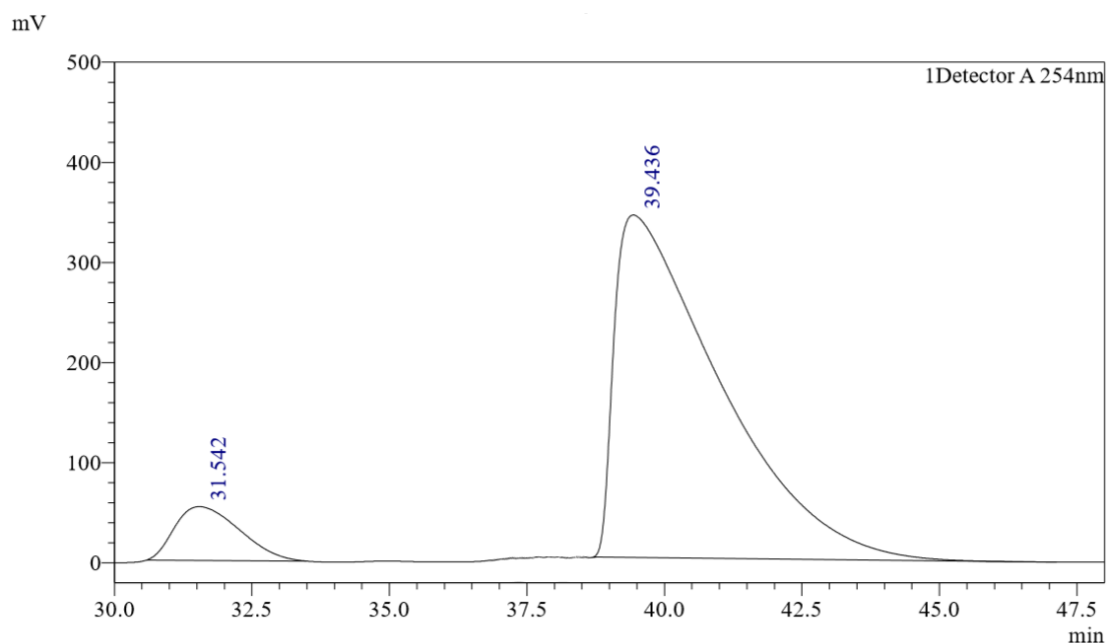

Peak Table

| Detector A 254nm |           |        |         |          |         |
|------------------|-----------|--------|---------|----------|---------|
| Peak#            | Ret. Time | Height | Height% | Area     | Area%   |
| 1                | 31.542    | 53746  | 13.585  | 4399162  | 8.792   |
| 2                | 39.436    | 341868 | 86.415  | 45636842 | 91.208  |
| Total            |           | 395614 | 100.000 | 50036004 | 100.000 |

**tert-butyl(R)-4-((S)-3-(3-chlorophenyl)-1-ethoxy-1-oxopropan-2-yl)-2-phenyl-2H-benzo[4,5]thiazolo[3,2-a]pyrimidine-3-carboxylate (4e)**

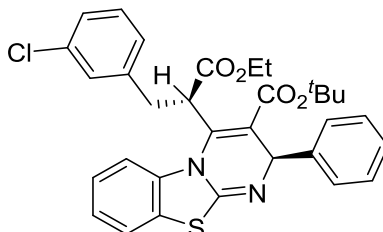

Yellow solid, (54.9 mg), 93% yield;  $[\alpha]_D^{25} = +119.3$  ( $c$  0.45,  $\text{CHCl}_3$ );  $^1\text{H}$  NMR (400 MHz,  $\text{CDCl}_3$ )  $\delta$  7.38 (d,  $J = 7.2$  Hz, 2H), 7.25 (t,  $J = 1.7$  Hz, 1H), 7.23-7.16 (m, 4H), 7.13 (dd,  $J = 7.7, 1.4$  Hz, 1H), 7.09-7.06 (m, 2H), 7.04-6.99 (m, 2H), 6.67-6.63 (m, 2H), 5.93 (s, 1H), 4.50 (dd,  $J = 10.8, 4.2$  Hz, 1H), 4.44-4.33 (m, 2H), 3.51 (dd,  $J = 13.6, 4.3$  Hz, 1H), 3.11 (dd,  $J = 13.6, 10.9$  Hz, 1H), 1.47 (s, 9H), 1.36 (d,  $J = 7.2$  Hz, 3H);  $^{13}\text{C}$  NMR (100 MHz,  $\text{CDCl}_3$ )  $\delta$  170.3, 164.8, 157.0, 145.7, 141.3, 139.4, 135.1, 134.3, 129.8, 128.3, 128.0, 127.2, 127.1, 126.9, 126.8, 125.7, 125.1, 124.4, 122.8, 115.2, 110.5, 81.7, 61.6, 61.2, 45.5, 36.5, 28.1, 14.3; HRMS (ESI)  $m/z$  calcd for  $\text{C}_{32}\text{H}_{31}\text{ClN}_2\text{O}_4\text{S} [\text{M}+\text{Na}]^+ = 597.1591$ , found = 597.1569; The ee value was 99.5%,  $t_R$  (major) = 11.2 min,  $t_R$  (minor) = 16.6 min (Chiralcel IC,  $\lambda = 254$  nm, 5% *i*-PrOH/hexanes, flow rate = 1.0 mL/min).

mAU

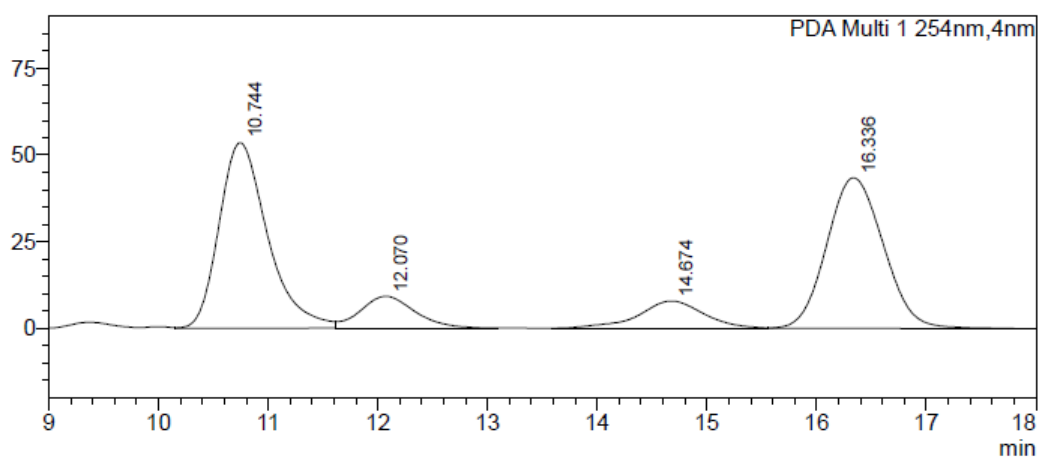

Peak Table

| Peak# | Ret. Time | Height | Height% | Area    | Area%   |
|-------|-----------|--------|---------|---------|---------|
| 1     | 10.744    | 53522  | 46.912  | 1648028 | 42.723  |
| 2     | 12.070    | 9175   | 8.042   | 315354  | 8.175   |
| 3     | 14.674    | 7905   | 6.929   | 332028  | 8.607   |
| 4     | 16.336    | 43487  | 38.117  | 1562083 | 40.495  |
| Total |           | 114090 | 100.000 | 3857493 | 100.000 |

mAU

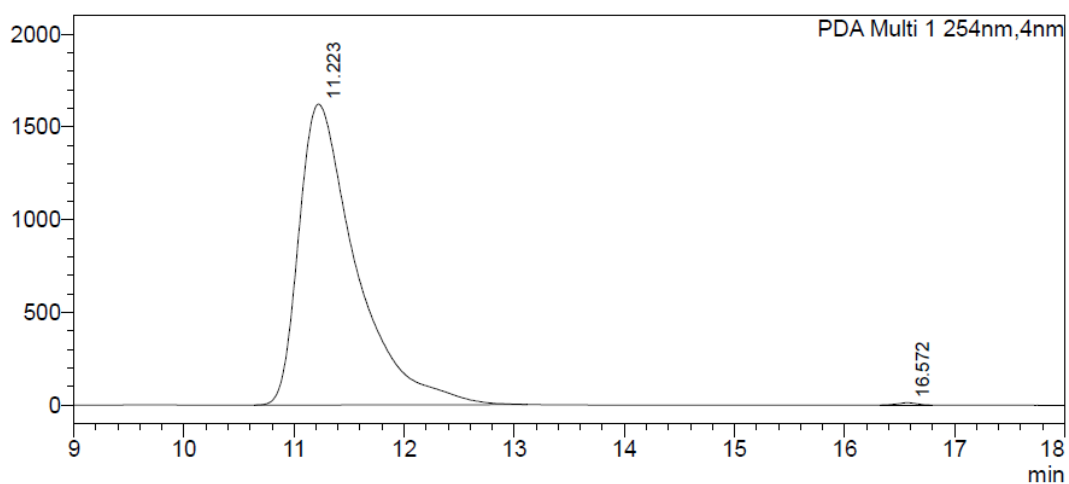

Peak Table

| Peak# | Ret. Time | Height  | Height% | Area     | Area%   |
|-------|-----------|---------|---------|----------|---------|
| 1     | 11.223    | 1621276 | 99.220  | 58446809 | 99.746  |
| 2     | 16.572    | 12742   | 0.780   | 148945   | 0.254   |
| Total |           | 1634017 | 100.000 | 58595754 | 100.000 |

**tert-butyl(R)-4-((S)-3-(2,4-dichlorophenyl)-1-ethoxy-1-oxopropan-2-yl)-2-phenyl-2H-benzo[4,5]thiazolo[3,2-a]pyrimidine-3-carboxylate (4f)**

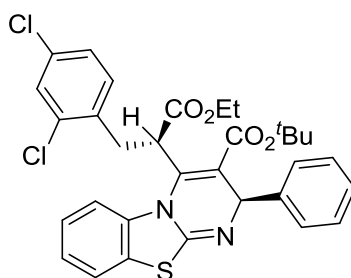

Yellow solid, (57.7 mg), 95% yield;  $[\alpha]_D^{25} = +148.7$  (*c* 0.50, CHCl<sub>3</sub>); <sup>1</sup>H NMR (400 MHz, CDCl<sub>3</sub>) δ 7.38 (d, *J* = 7.2 Hz, 2H), 7.26-7.22 (m, 2H), 7.20-7.16 (m, 2H), 7.14-7.00 (m, 5H), 6.84 (d, *J* = 8.2 Hz, 1H), 5.94 (s, 1H), 4.69 (dd, *J* = 10.5, 4.4 Hz, 1H), 4.44-4.32 (m, 2H), 3.65 (dd, *J* = 13.5, 4.4 Hz, 1H), 3.21 (dd, *J* = 13.5, 10.5 Hz, 1H), 1.46 (s, 9H), 1.37 (t, *J* = 7.2 Hz, 3H); <sup>13</sup>C NMR (100 MHz, CDCl<sub>3</sub>) δ 170.5, 165.2, 157.6, 146.2, 141.6, 135.5, 134.7, 134.1, 134.0, 132.2, 129.4, 128.7, 127.9, 127.7, 127.3, 126.0, 125.9, 124.9, 122.8, 116.0, 111.2, 82.2, 62.0, 61.7, 43.6, 34.5, 28.5, 14.7. HRMS (ESI) *m/z* calcd for C<sub>32</sub>H<sub>30</sub>Cl<sub>2</sub>N<sub>2</sub>O<sub>4</sub>S [M+Na]<sup>+</sup> = 631.1201, found = 631.1192; The ee value was 84%, *t<sub>R</sub>* (major) = 16.2 min, *t<sub>R</sub>* (minor) = 10.7 min (Chiralcel IG, λ = 254 nm, 5% *i*-PrOH/hexanes, flow rate = 1.0 mL/min).

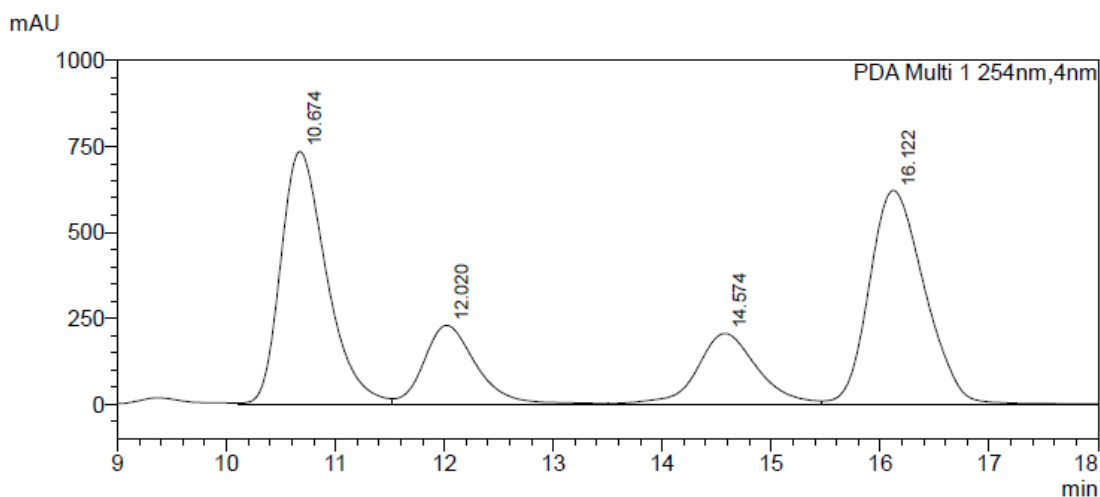

Peak Table

| Peak# | Ret. Time | Height  | Height% | Area     | Area%   |
|-------|-----------|---------|---------|----------|---------|
| 1     | 10.674    | 735089  | 41.026  | 21460730 | 36.334  |
| 2     | 12.020    | 229495  | 12.808  | 7665313  | 12.978  |
| 3     | 14.574    | 205701  | 11.480  | 7899797  | 13.375  |
| 4     | 16.122    | 621481  | 34.685  | 22038563 | 37.313  |
| Total |           | 1791765 | 100.000 | 59064404 | 100.000 |

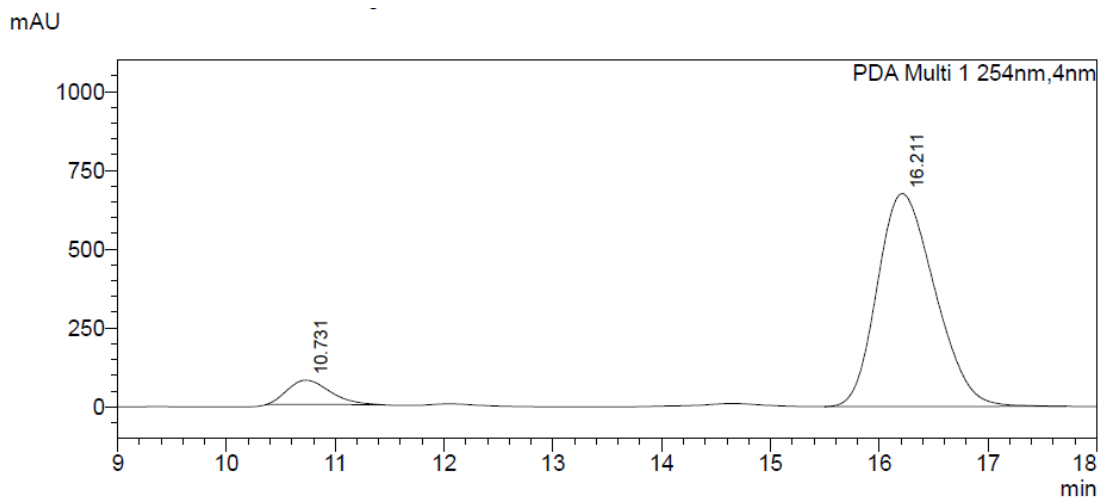

Peak Table

| Peak# | Ret. Time | Height | Height% | Area     | Area%   |
|-------|-----------|--------|---------|----------|---------|
| 1     | 10.731    | 77164  | 10.254  | 2098829  | 7.789   |
| 2     | 16.211    | 675366 | 89.746  | 24845533 | 92.211  |
| Total |           | 752530 | 100.000 | 26944362 | 100.000 |

**methyl(R)-4-((S)-1-ethoxy-1-oxopropan-2-yl)-2-phenyl-2H-benzo[4,5]thiazolo[3,2-a]pyrimidine-3-carboxylate (4g)**

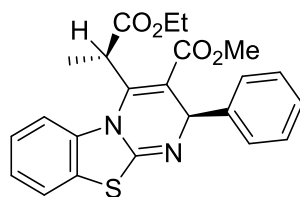

White foam, (38.4 mg), 91% yield;  $[\alpha]_D^{25} = +33.2$  (*c* 0.60, CHCl<sub>3</sub>); <sup>1</sup>H NMR (400 MHz, CDCl<sub>3</sub>) δ 7.42 (d, *J* = 7.2 Hz, 2H), 7.34 (dd, *J* = 8.0, 7.5 Hz, 1H), 7.30-7.27 (m, 2H), 7.25 (s, 1H), 7.24-7.21 (m, 2H), 7.20-7.11 (m, 2H), 6.02 (s, 1H), 4.36-4.26 (m, 3H), 3.71 (s, 3H), 1.46 (d, *J* = 6.8 Hz, 3H), 1.33 (t, *J* = 7.1 Hz, 3H); <sup>13</sup>C NMR (100 MHz, CDCl<sub>3</sub>) δ 171.4, 166.1, 157.2, 148.1, 141.0, 135.5, 128.6, 127.5, 127.0, 125.7, 124.7, 122.9, 115.1, 108.4, 100.0, 61.4, 51.9, 39.5, 29.7, 16.3, 14.3. HRMS (ESI) *m/z* calcd for C<sub>23</sub>H<sub>22</sub>N<sub>2</sub>O<sub>4</sub>S [M+Na]<sup>+</sup> = 445.1198, found = 445.1195; The ee value was 87%, *t<sub>R</sub>* (major) = 40.6 min, *t<sub>R</sub>* (minor) = 37.0 min (Chiralcel IE, λ = 254 nm, 10% *i*-PrOH/hexanes, flow rate = 1.0 mL/min).

mAU

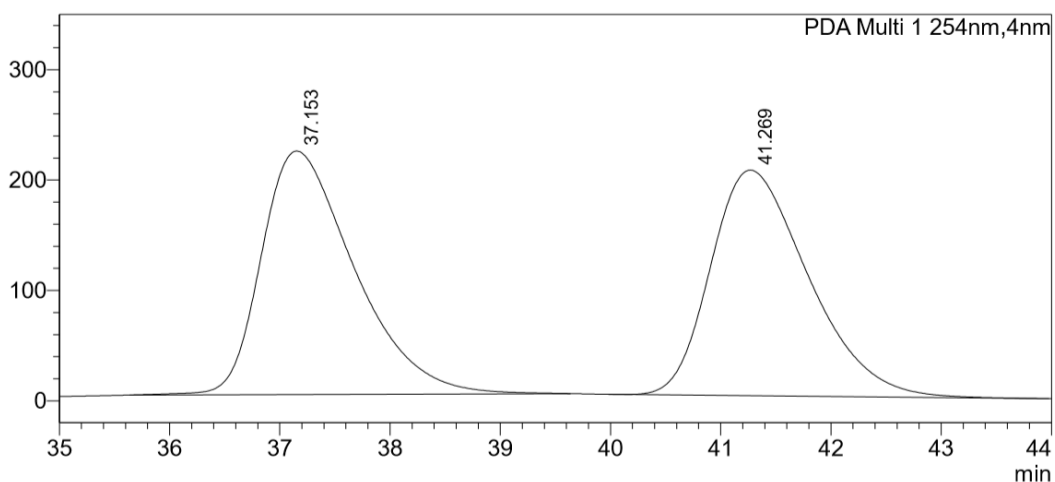

Peak Table

| PDA Ch1 254nm |           |        |         |          |         |  |
|---------------|-----------|--------|---------|----------|---------|--|
| Peak#         | Ret. Time | Height | Height% | Area     | Area%   |  |
| 1             | 37.153    | 220609 | 51.896  | 12953130 | 50.620  |  |
| 2             | 41.269    | 204489 | 48.104  | 12635641 | 49.380  |  |
| Total         |           | 425098 | 100.000 | 25588771 | 100.000 |  |

mAU

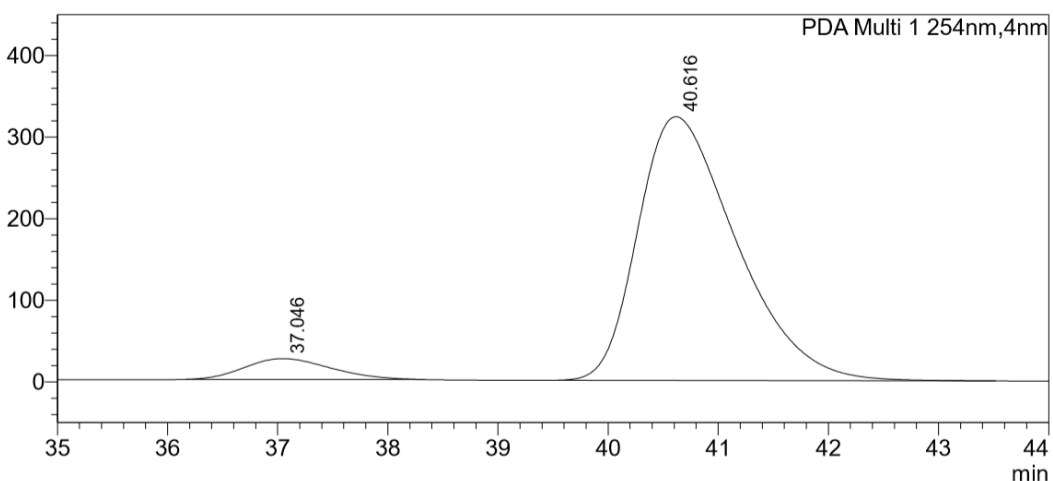

Peak Table

| PDA Ch1 254nm |           |        |         |          |         |  |
|---------------|-----------|--------|---------|----------|---------|--|
| Peak#         | Ret. Time | Height | Height% | Area     | Area%   |  |
| 1             | 37.046    | 25548  | 7.322   | 1392768  | 6.473   |  |
| 2             | 40.616    | 323388 | 92.678  | 20123993 | 93.527  |  |
| Total         |           | 348936 | 100.000 | 21516761 | 100.000 |  |

**ethyl(R)-4-((S)-1-ethoxy-1-oxopropan-2-yl)-2-phenyl-2H-benzo[4,5]thiazolo[3,2-a]pyrimidine-3-carboxylate (4h)**

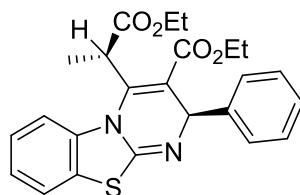

White foam, (38.8 mg), 89% yield;  $[\alpha]_D^{25} = +129.0$  (c 0.60,  $\text{CHCl}_3$ );  $^1\text{H NMR}$  (400

MHz, CDCl<sub>3</sub>) δ 7.42-7.40 (m, 2H), 7.33 (dd, *J* = 7.6, 1.1 Hz, 1H), 7.28-7.24 (m, 2H), 7.22-7.09 (m, 4H), 6.02 (s, 1H), 4.34-4.23 (m, 3H), 4.22-4.12 (m, 2H), 1.47 (d, *J* = 6.9 Hz, 3H), 1.30 (t, *J* = 7.1 Hz, 3H), 1.21 (t, *J* = 7.1 Hz, 3H); <sup>13</sup>C NMR (100 MHz, CDCl<sub>3</sub>) δ 171.4, 165.6, 157.4, 147.7, 141.1, 135.5, 128.5, 127.5, 127.0, 125.7, 125.2, 124.6, 122.9, 115.1, 108.9, 61.5, 61.0, 39.4, 31.6, 22.7, 16.2, 14.2. HRMS (ESI) *m/z* calcd for C<sub>24</sub>H<sub>24</sub>N<sub>2</sub>O<sub>4</sub>S [M+Na]<sup>+</sup> = 459.1354, found = 459.1357; The ee value was 86%, *t<sub>R</sub>* (major) = 30.4 min, *t<sub>R</sub>* (minor) = 51.7 min (Chiralcel IC, λ = 254 nm, 10% *i*-PrOH/hexanes, flow rate = 1.0 mL/min).

mV

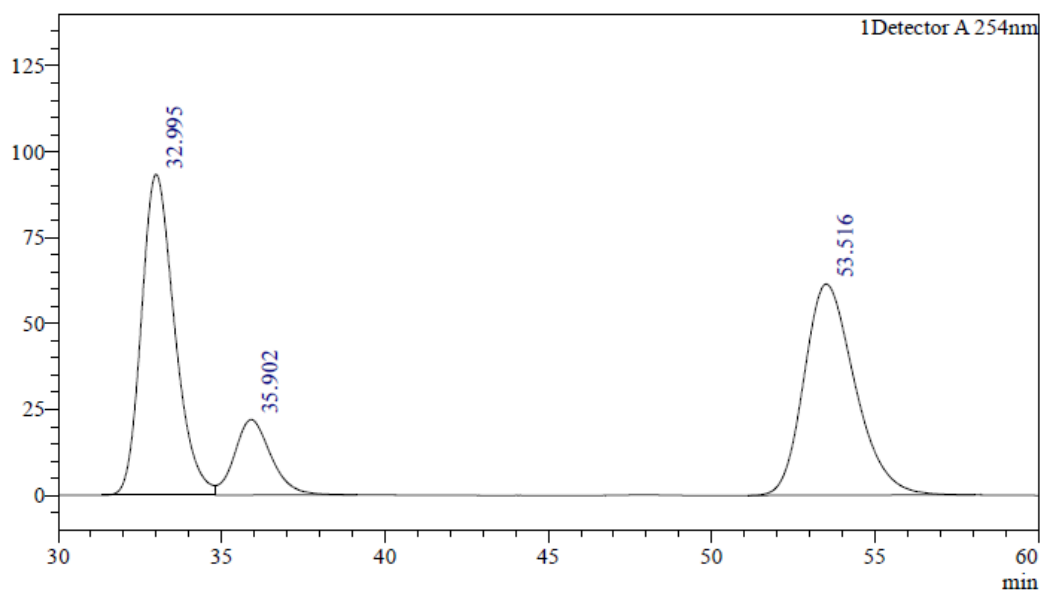

Peak Table

| Detector A 254nm |           |        |         |          |         |
|------------------|-----------|--------|---------|----------|---------|
| Peak#            | Ret. Time | Height | Height% | Area     | Area%   |
| 1                | 32.995    | 93349  | 52.836  | 6590998  | 44.065  |
| 2                | 35.902    | 21909  | 12.400  | 1701542  | 11.376  |
| 3                | 53.516    | 61419  | 34.764  | 6664738  | 44.558  |
| Total            |           | 176678 | 100.000 | 14957278 | 100.000 |



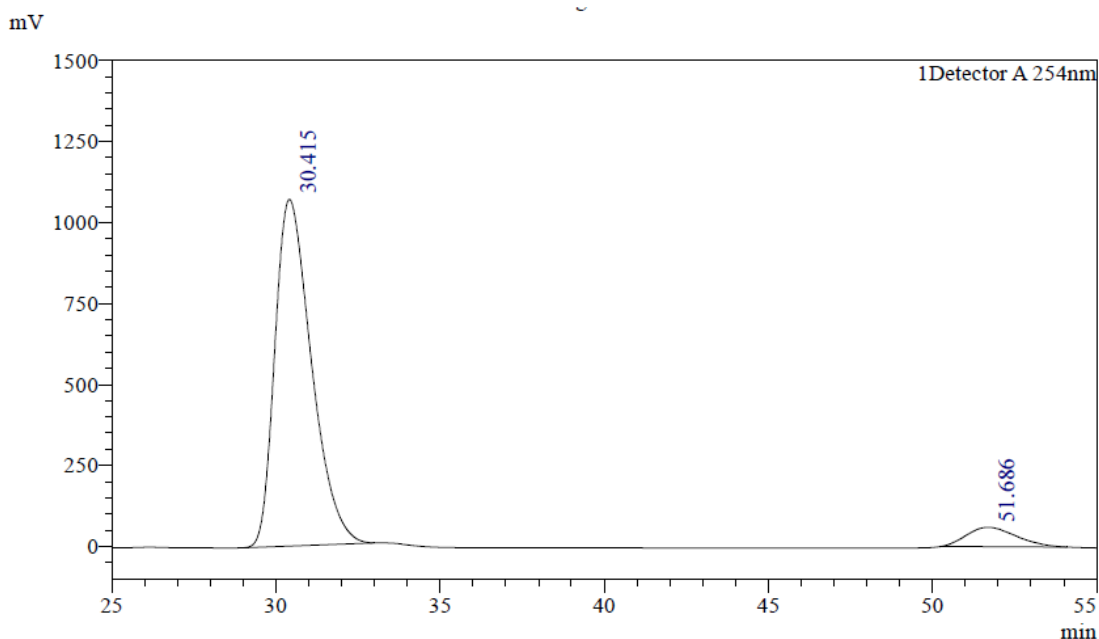

Peak Table

| Peak# | Ret. Time | Height  | Height% | Area     | Area%   |
|-------|-----------|---------|---------|----------|---------|
| 1     | 30.415    | 1070050 | 94.715  | 82792805 | 92.923  |
| 2     | 51.686    | 59710   | 5.285   | 6305473  | 7.077   |
| Total |           | 1129761 | 100.000 | 89098279 | 100.000 |

**tert-butyl(R)-4-((S)-1-(tert-butoxy)-1-oxopropan-2-yl)-2-phenyl-2H-benzo[4,5]thiazolo[3,2-a]pyrimidine-3-carboxylate (4i)**

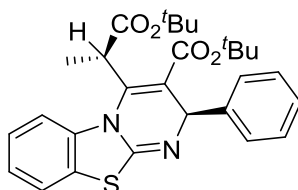

White foam, (45.7 mg), 90% yield;  $[\alpha]_D^{25} = +107.9$  (*c* 0.45, CHCl<sub>3</sub>); <sup>1</sup>H NMR (400 MHz, CDCl<sub>3</sub>) δ 7.41-7.39 (m, 2H), 7.34 (dd, *J* = 7.6, 1.4 Hz, 1H), 7.27 (t, *J* = 1.8 Hz, 1H), 7.25-7.20 (m, 3H), 7.19-7.09 (m, 2H), 5.91 (s, 1H), 4.24 (s, 1H), 1.48-1.45 (m, 12H), 1.40 (s, 9H); <sup>13</sup>C NMR (100 MHz, CDCl<sub>3</sub>) δ 170.3, 164.5, 157.2, 147.7, 141.9, 135.8, 128.4, 127.3, 127.0, 125.6, 125.1, 124.3, 122.9, 114.8, 110.1, 81.7, 81.2, 61.8, 40.1, 28.2, 28.0, 15.8. HRMS (ESI) *m/z* calcd for C<sub>28</sub>H<sub>32</sub>N<sub>2</sub>O<sub>4</sub>S [M+Na]<sup>+</sup> = 515.1980, found = 515.1972; The ee value was 86%, *t<sub>R</sub>* (major) = 16.1 min, *t<sub>R</sub>* (minor) = 26.0 min (Chiralcel IC, λ = 254 nm, 2% *i*-PrOH/hexanes, flow rate = 0.5 mL/min).

mV

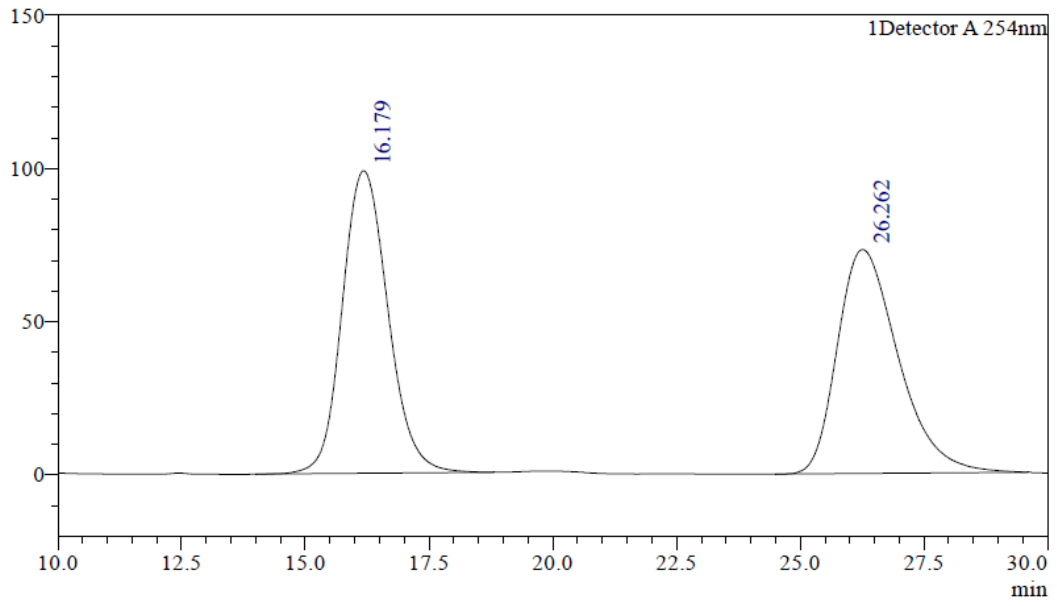

Peak Table

| Peak# | Ret. Time | Height | Height% | Area     | Area%   |
|-------|-----------|--------|---------|----------|---------|
| 1     | 16.179    | 98772  | 57.460  | 6365696  | 50.384  |
| 2     | 26.262    | 73126  | 42.540  | 6268787  | 49.616  |
| Total |           | 171897 | 100.000 | 12634483 | 100.000 |

mV

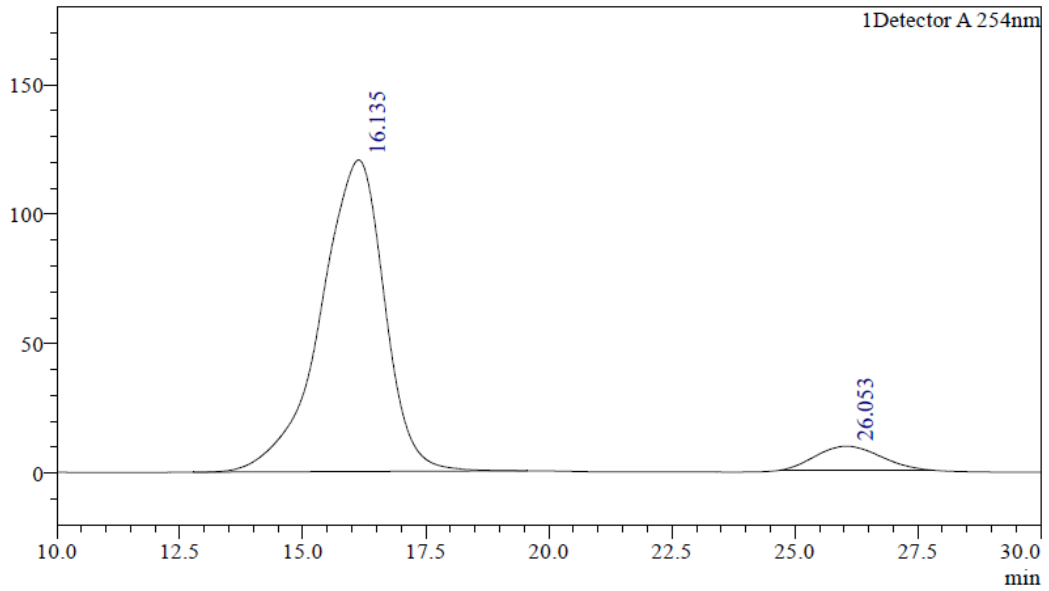

Peak Table

| Peak# | Ret. Time | Height | Height% | Area     | Area%   |
|-------|-----------|--------|---------|----------|---------|
| 1     | 16.135    | 120354 | 92.936  | 10896037 | 92.902  |
| 2     | 26.053    | 9149   | 7.064   | 832464   | 7.098   |
| Total |           | 129502 | 100.000 | 11728501 | 100.000 |

## 6. Scale-up Synthesis and Synthetic Elaboration of Product

### (i). General procedure of scale-up synthesis

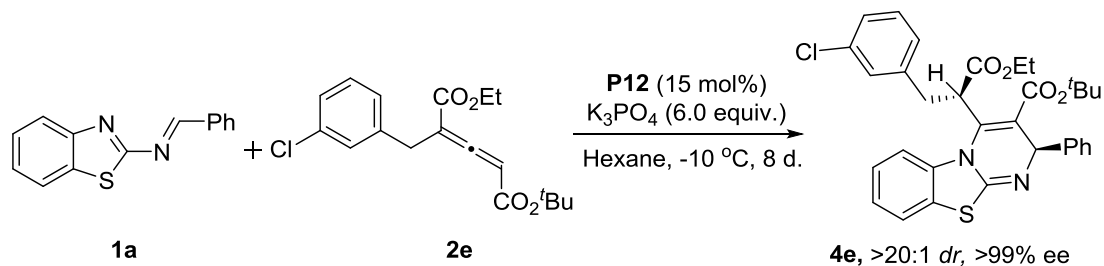

To a flame-dried round bottle flask with a magnetic stirring bar were added 2-benzothiazolimine **1a** (1.0 g, 4.20 mmol), allenolate **2e** (1.20 mmol), phosphonium salt **P12** (0.15 mmol) and  $K_3PO_4$  (6.00 mmol), followed by the addition of Hexane. The reaction mixture was stirred at  $-10\text{ }^\circ\text{C}$  for 8 days. The reaction was added  $H_2O$  (10 mL), and the mixture was extracted with DCM (10 mL x 3), dried over  $Na_2SO_4$ , the solvent was removed under reduced pressure, and the residue was purified by column chromatography on silica gel to afford **4e** (1.61 g, 67% yield,  $>99\%$  ee,  $>20:1$  dr) as a yellow solid.

### (ii). Synthetic elaboration of product

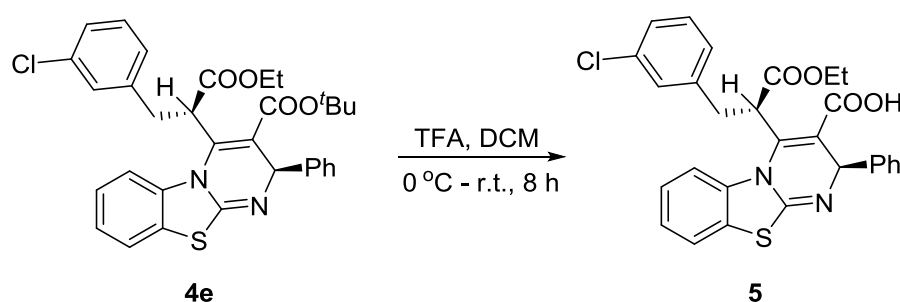

To a solution of **4e** (57.5 mg, 0.1 mmol) in DCM (5.0 mL) was added TFA (18.9 mg, 0.5 mmol) at  $0\text{ }^\circ\text{C}$ . Then, the mixture was allowed to stir under nitrogen atmosphere at room temperature for 8 h. After stirring for 8 h, the reaction mixture was quenched with saturated aqueous NaCl, the aqueous phase was extracted three times with DCM. The combined organic phase was dried over anhydrous  $Na_2SO_4$  and concentrated under reduce pressure. The residue was purified by silica gel column chromatography to afford the desired product **5** as a light-yellow oil (45.2 mg,  $>99\%$  ee,  $>20:1$  dr).

Yellow oil;  $[\alpha]_D^{25} = +97.2$  (*c* 0.50, CHCl<sub>3</sub>); <sup>1</sup>H NMR (400 MHz, DMSO)  $\delta$  7.38 (d, *J* = 7.7 Hz, 1H), 7.32 (d, *J* = 7.4 Hz, 2H), 7.20 (t, *J* = 7.3 Hz, 3H), 7.16-6.98 (m, 5H), 6.71 (d, *J* = 9.0 Hz, 2H), 5.91 (s, 1H), 4.25 (dd, *J* = 17.7, 11.2 Hz, 3H), 3.33 (dd, *J* = 13.2, 4.1 Hz, 2H), 3.27-3.08 (m, 1H), 1.28 (t, *J* = 7.1 Hz, 3H). <sup>13</sup>C NMR (100 MHz, DMSO)  $\delta$  170.6, 156.0, 142.7, 141.0, 135.7, 133.3, 130.1, 128.5, 128.3, 127.5, 127.4, 127.2, 126.7, 126.1, 124.2, 124.0, 123.2, 114.7, 62.0, 60.9, 45.3, 36.3, 14.6. HRMS (ESI) *m/z* calcd for C<sub>28</sub>H<sub>23</sub>N<sub>2</sub>O<sub>4</sub>S [M+Na]<sup>+</sup> = 541.0965, found = 541.0940.

## 7. Mechanistic Studies and Proposed Mechanism

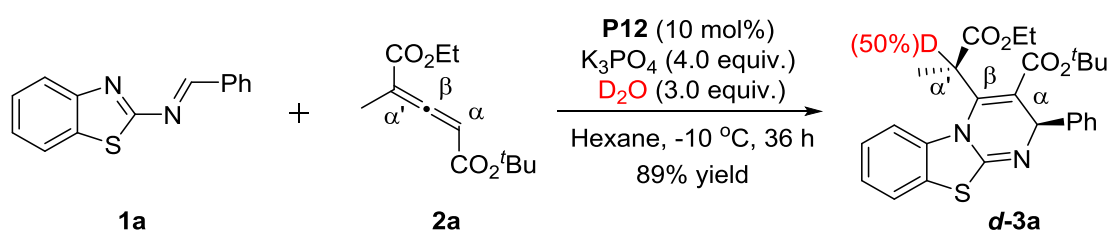

**Figure S1.** Deuterium-labeling Experiment.

### (i). General procedure of **d-3a**

To a flame-dried round bottle flask with a magnetic stirring bar were added the 2-benzothiazolimine **1a** (0.10 mmol), allenoate **2a** (1.20 mmol), phosphonium salt **P12** (0.10 mmol) and K<sub>3</sub>PO<sub>4</sub> (4.00 mmol), followed by the addition of hexane and deuterium oxide (24  $\mu$ L, 1.20 mmol). The reaction mixture was stirred at -10 °C for 36 h. Then, the aqueous phase was extracted three times with DCM. The combined organic phase was dried over anhydrous Na<sub>2</sub>SO<sub>4</sub> and concentrated under reduced pressure. The residue was purified by column chromatography on silica gel to give **d-3a** as a white solid. <sup>1</sup>H NMR (400 MHz, CDCl<sub>3</sub>)  $\delta$  7.43-7.41 (m 2H), 7.34-7.32 (m, 1H), 7.30-7.25 (m, 2H), 7.22-7.21 (m, 1H), 7.17-7.16 (m, 2H), 7.14-7.08 (m, 1H), 5.91 (s, 1H), 4.31-4.25 (m, 2.5H), 1.68 (s, 1H), 1.50 (d, *J* = 6.9 Hz, 3H), 1.42 (s, 1H), 1.39 (s, 9H), 1.29 (t, *J* = 7.2 Hz, 3H); HRMS (ESI) *m/z* calcd for C<sub>27</sub>H<sub>27</sub>DN<sub>2</sub>O<sub>4</sub>S [M+Na]<sup>+</sup> = 488.1730, found = 488.1726.

## (ii). Control Experiments and Mechanism

The methylated catalysts **P12-1** was prepared and used for the [4 + 2] reaction to test the reactivities and enantioselectivities. The results were displayed in **Figure S2**. When methylated catalysts were used, the enantioselectivities decreased. The result clearly verify the significance of the hydrogen bonding in the catalytic system. On the basis of the experiments, the deuterium-labeling experiment, our previous research and the absolute configuration, a plausible mechanism was presented.

### a) Control experiments:

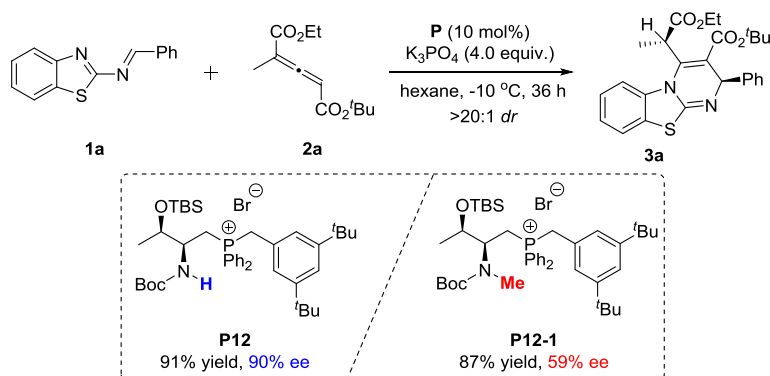

### b) Postulated mechanism:

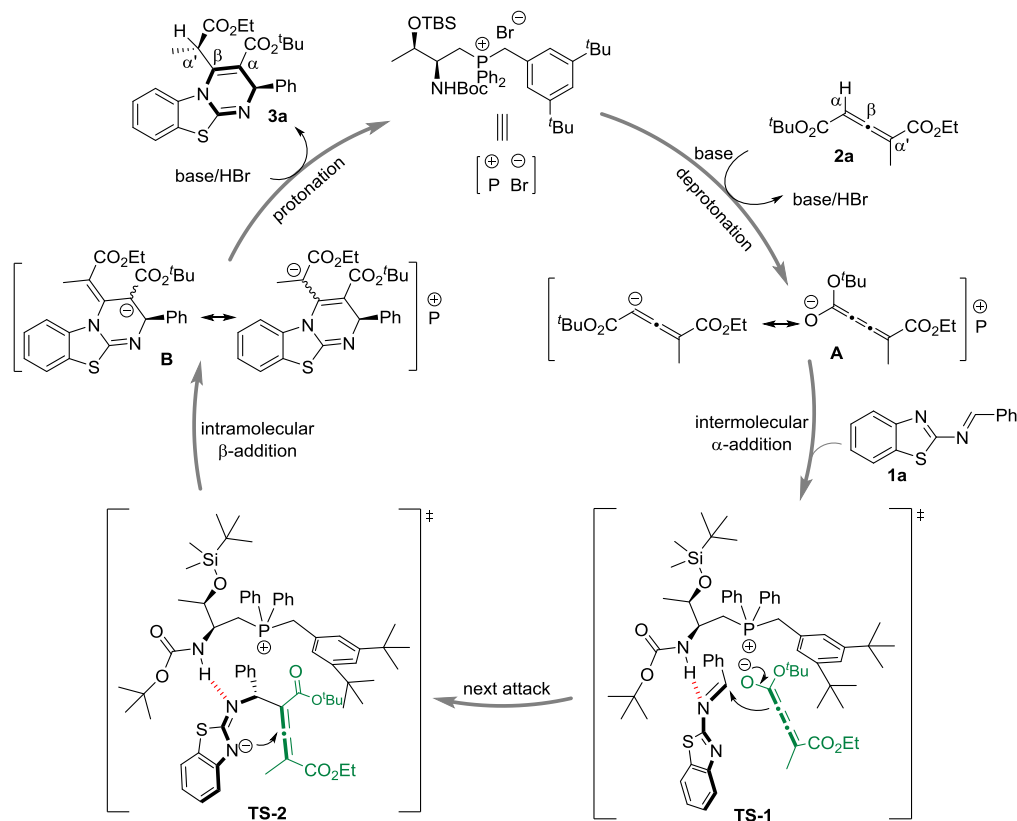

**Figure S2.** Control experiments and postulated mechanism.

## 8. Crystal Structure of Product 4e.

the X-ray crystal of **4e** was obtained (Table S4). CCDC 1966944 contains the supplementary crystallographic data of the adduct **4e** for this paper. These data can be obtained free of charge from The Cambridge Crystallographic Data Centre via [www.ccdc.cam.ac.uk/data\\_request/cif](http://www.ccdc.cam.ac.uk/data_request/cif)

**Table S4.** Crystal data and structure refinement for **4e**.

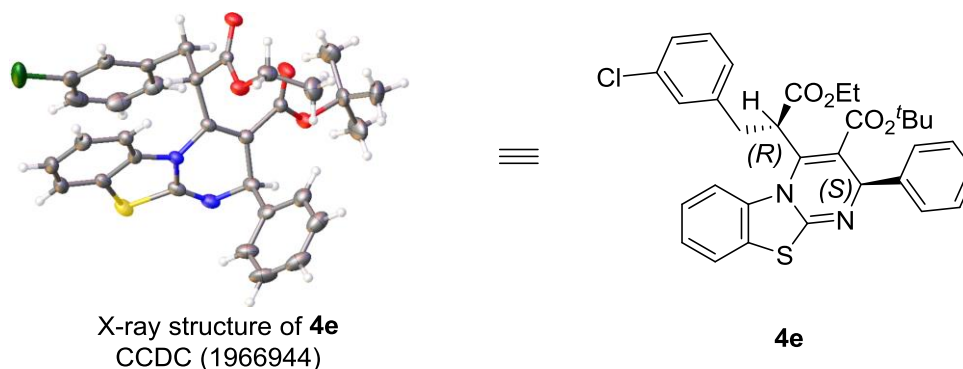

|                                |                                                                   |
|--------------------------------|-------------------------------------------------------------------|
| Identification code            | WTL-LDM-150K                                                      |
| Empirical formula              | C <sub>32</sub> H <sub>31</sub> ClN <sub>2</sub> O <sub>4</sub> S |
| Formula weight                 | 575.10                                                            |
| Temperature/K                  | 150.01(10)                                                        |
| Crystal system                 | monoclinic                                                        |
| Space group                    | P2 <sub>1</sub>                                                   |
| a/Å                            | 8.29029(17)                                                       |
| b/Å                            | 20.9516(4)                                                        |
| c/Å                            | 8.39594(16)                                                       |
| α /°                           | 90                                                                |
| β /°                           | 97.0201(18)                                                       |
| γ /°                           | 90                                                                |
| Volume/Å <sup>3</sup>          | 1447.40(5)                                                        |
| Z                              | 2                                                                 |
| ρ calcd/cm <sup>3</sup>        | 1.320                                                             |
| μ /mm <sup>-1</sup>            | 2.165                                                             |
| F(000)                         | 604.0                                                             |
| Crystal size/mm <sup>3</sup>   | 0.6 × 0.3 × 0.3                                                   |
| Radiation                      | CuKα (λ = 1.54184)                                                |
| 2θ range for data collection/° | 8.44 to 143.534                                                   |
| Index ranges                   | -9 ≤ h ≤ 10, -25 ≤ k ≤ 25, -10 ≤ l ≤ 6                            |
| Reflections collected          | 13708                                                             |

---

|                                             |                                                   |
|---------------------------------------------|---------------------------------------------------|
| Independent reflections                     | 5560 [Rint = 0.0453, Rsigma = 0.0483]             |
| Data/restraints/parameters                  | 5560/1/365                                        |
| Goodness-of-fit on F <sup>2</sup>           | 1.048                                             |
| Final R indexes [ $I \geq 2\sigma(I)$ ]     | R <sub>1</sub> = 0.0536, wR <sub>2</sub> = 0.1369 |
| Final R indexes [all data]                  | R <sub>1</sub> = 0.0554, wR <sub>2</sub> = 0.1404 |
| Largest diff. peak/hole / e Å <sup>-3</sup> | 0.26/-0.41                                        |
| Flack parameter                             | -0.021(10)                                        |

---

## 9. Reference

- [1] (a) X. Han, Y. Wang, F. Zhong and Y. Lu, *J. Am. Chem. Soc.*, 2011, **133**, 1726; (b) X. Han, F. Zhong, Y. Wang and Y. Lu, *Angew. Chem., Int. Ed.*, 2012, **51**, 767; (c) F. Zhong, X. Han, Y. Wang and Y. Lu, *Chem. Sci.*, 2012, **3**, 1231; (d) F. Zhong, X. Han, Y. Wang and Y. Lu, *Angew. Chem., Int. Ed.*, 2011, **50**, 7837; (e) F. Zhong, J. Luo, G.-Y. Chen, X. Dou and Y. Lu, *J. Am. Chem. Soc.*, 2012, **134**, 10222; (f) F. Zhong, X. Dou, X. Han, W. Yao, Q. Zhu, Y. Meng and Y. Lu, *Angew. Chem., Int. Ed.*, 2013, **52**, 943.
- [2] (a) Q. Ni, X. Song, J. Xiong, G. Raabe and D. Enders, *Chem. Commun.*, 2015, **51**, 1263; (b) L. Jarrige, D. Glavač, G. Levitre, P. Retailleau, G. Bernadat, L. Neuville and G. Masson, *Chem. Sci.*, 2019, **10**, 3765.
- [3] (a) T. Hashimoto, Y. Naganawa and K. Maruoka, *J. Am. Chem. Soc.*, 2009, **131**, 6614; (b) T. Hashimoto, K. Sakata, F. Tamakuni, M. J. Dutton and K. Maruoka, *Nat. Chem.*, 2013, **5**, 240.



## 10. NMR Spectra

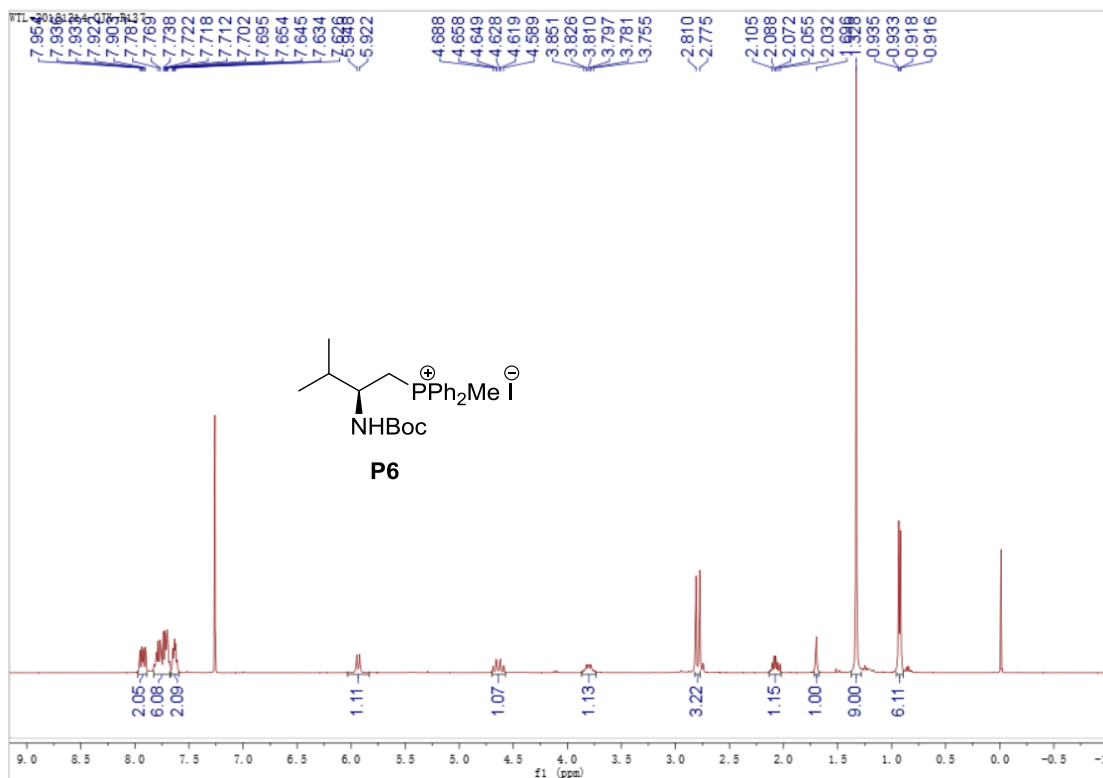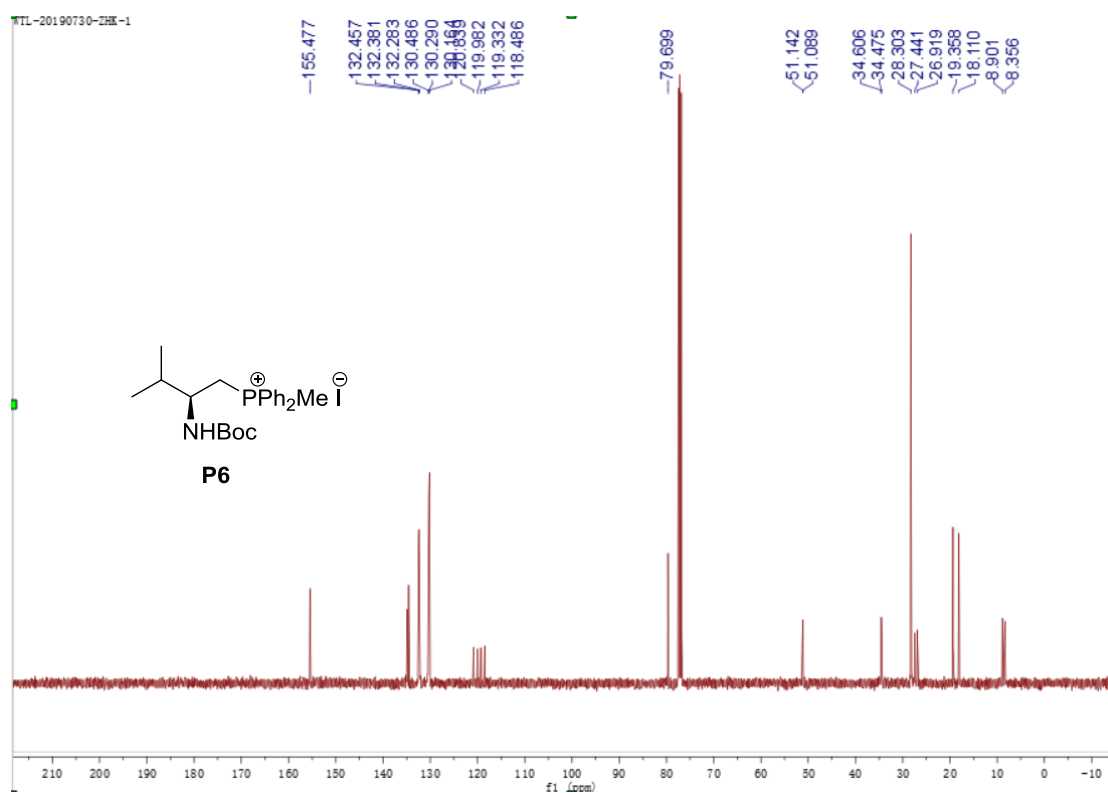

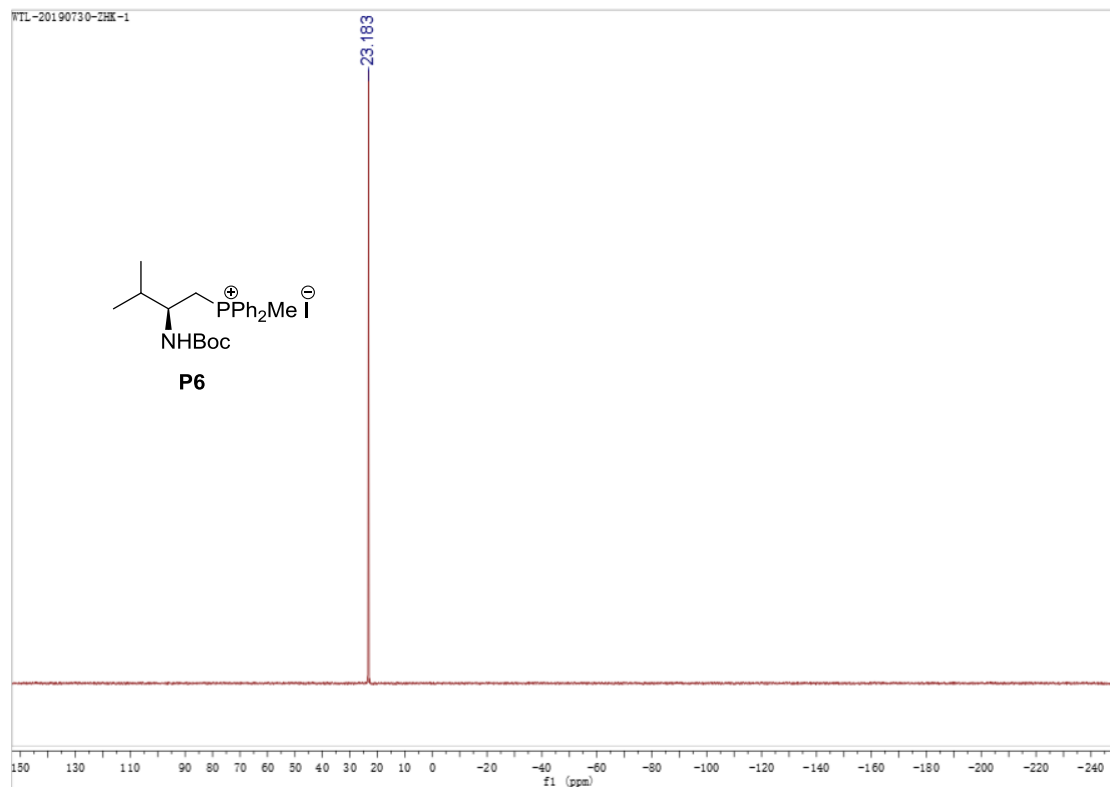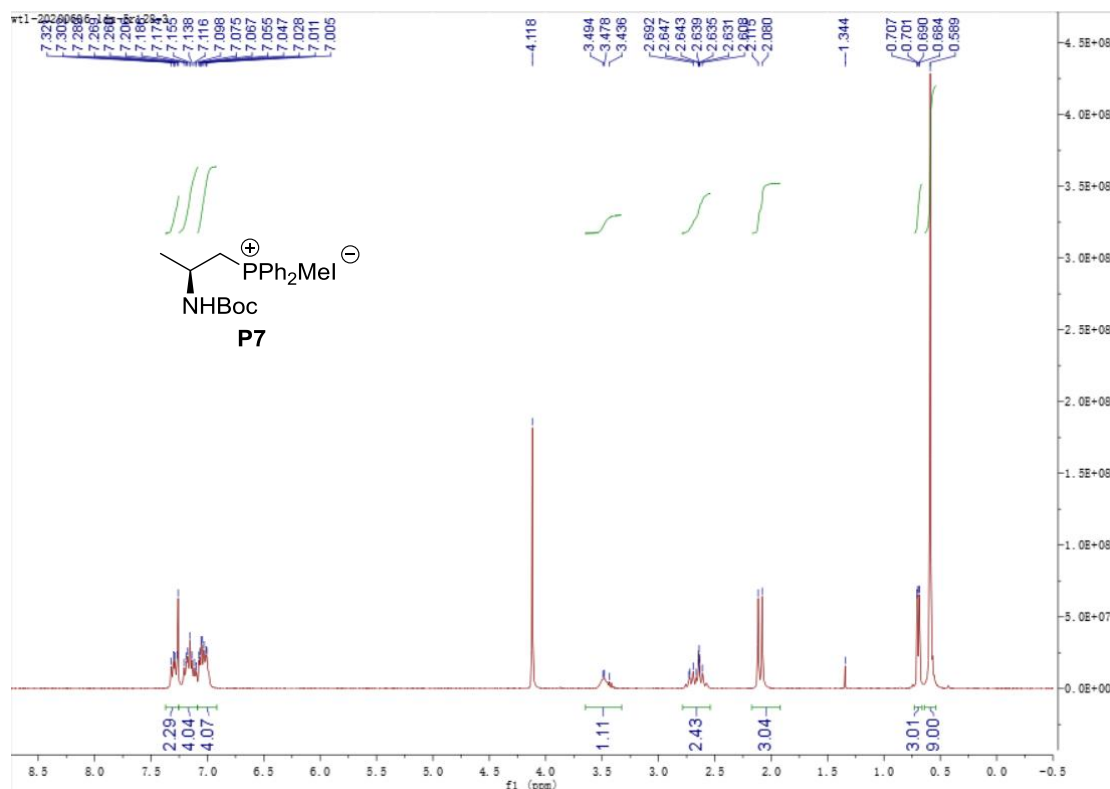

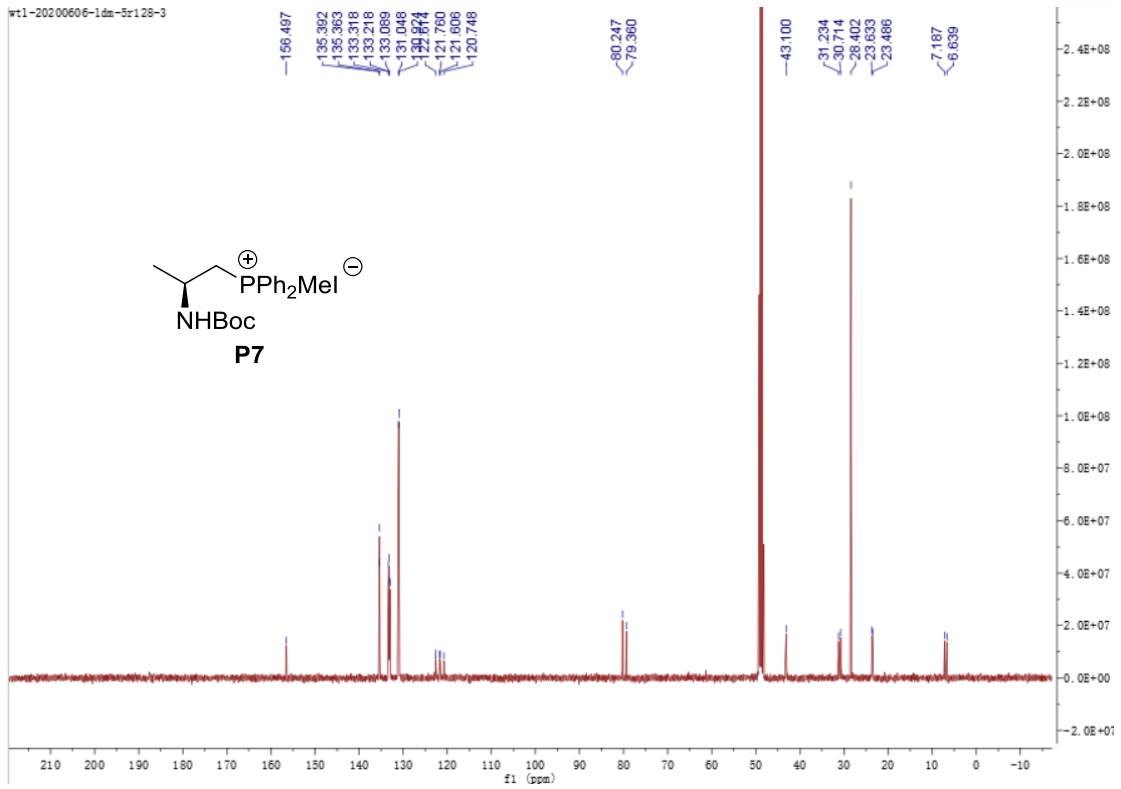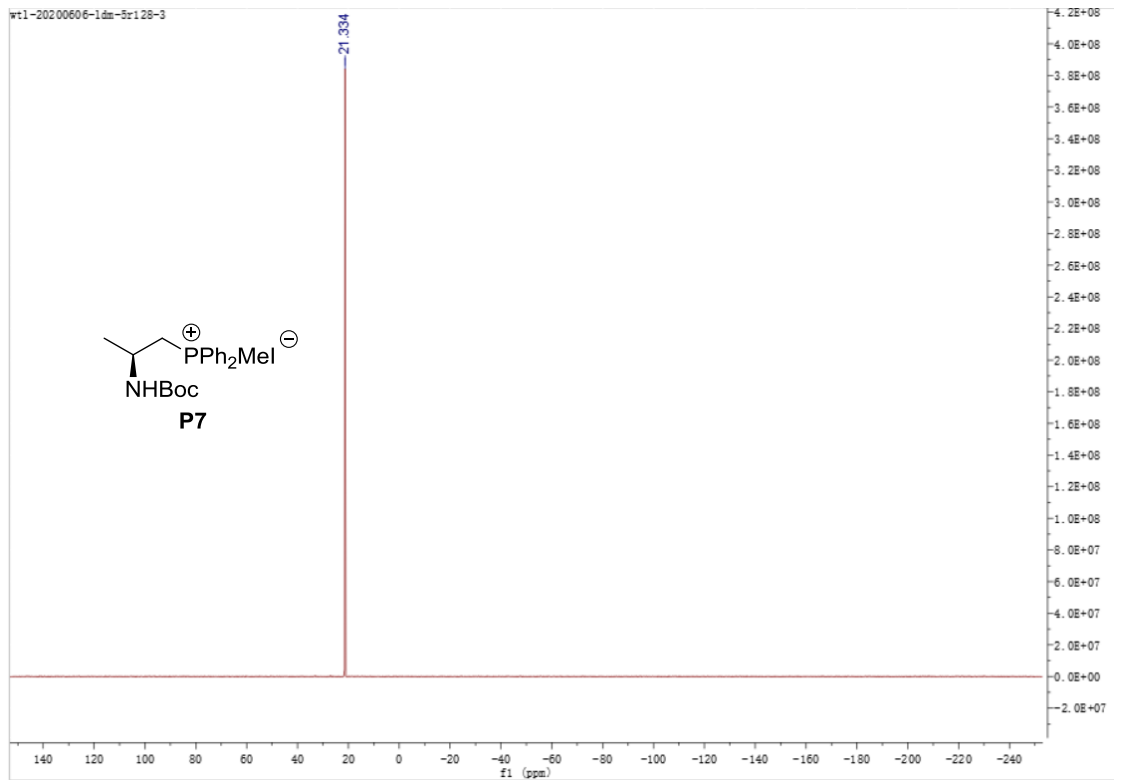



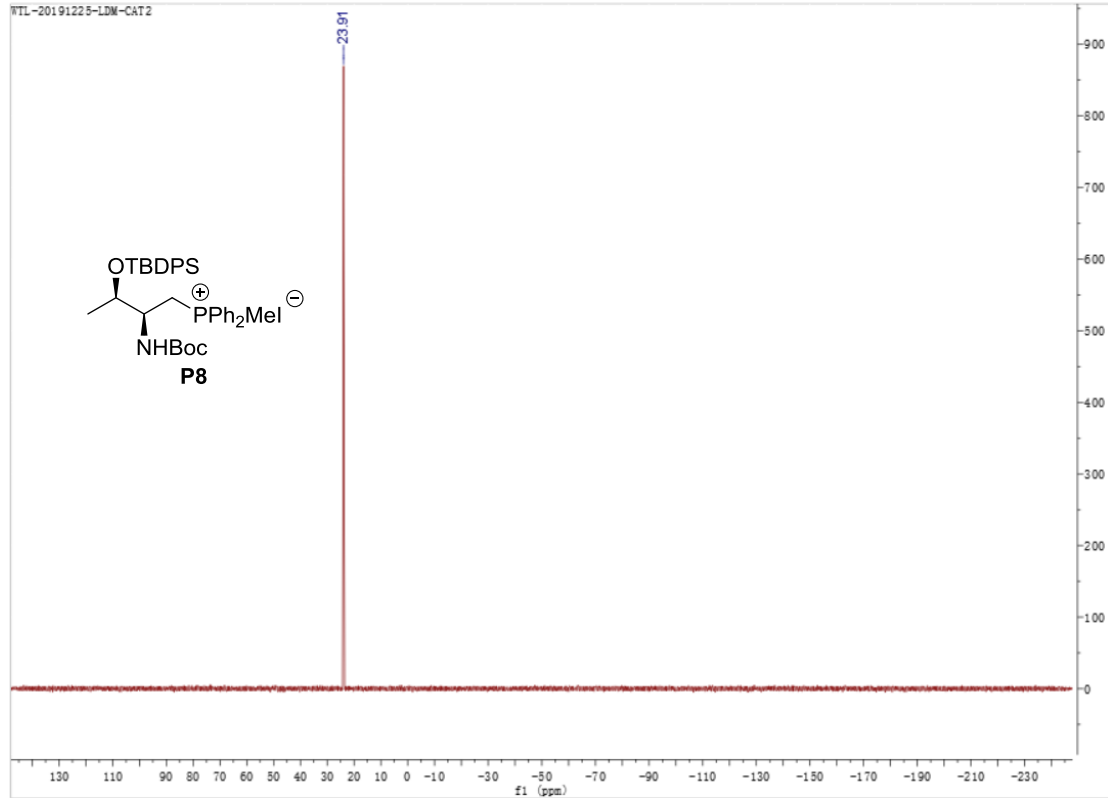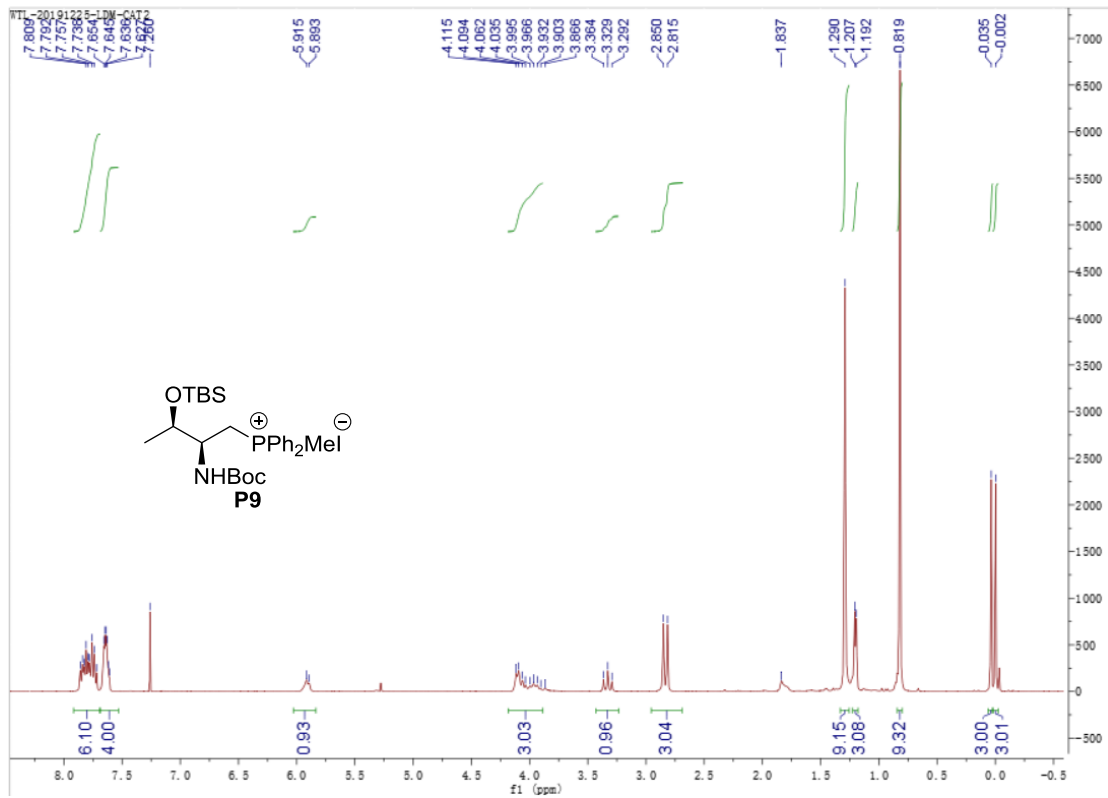



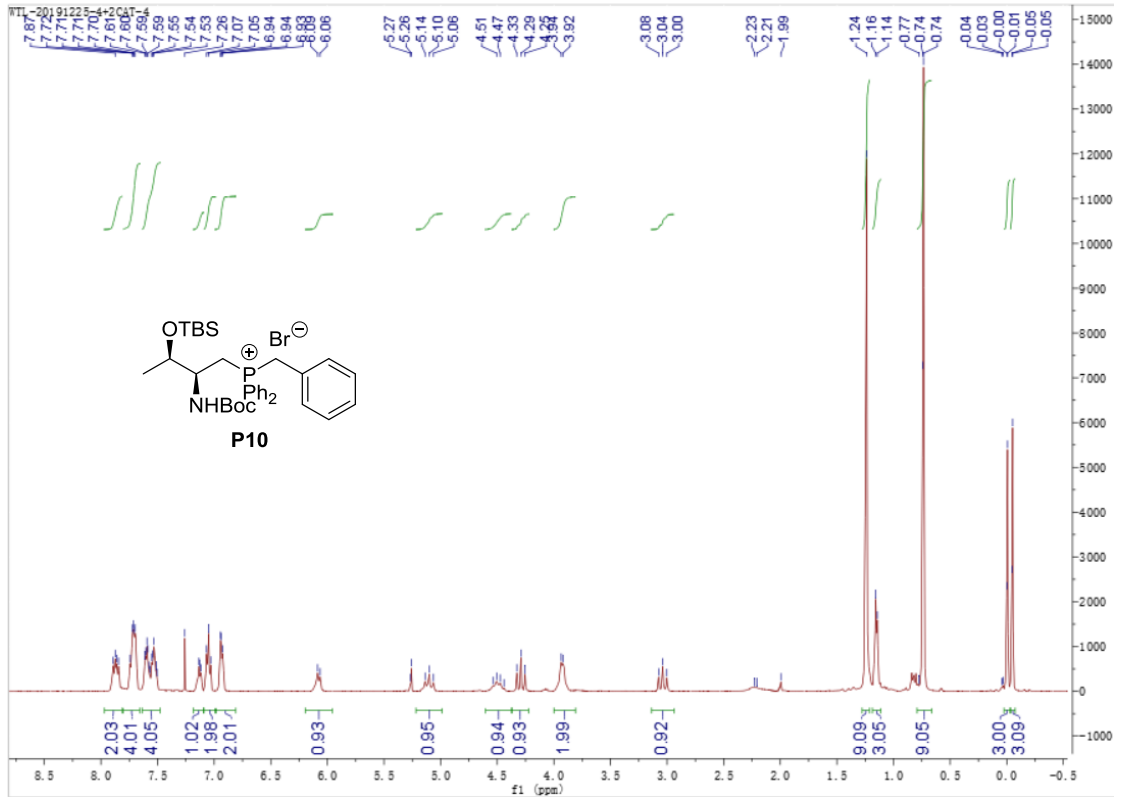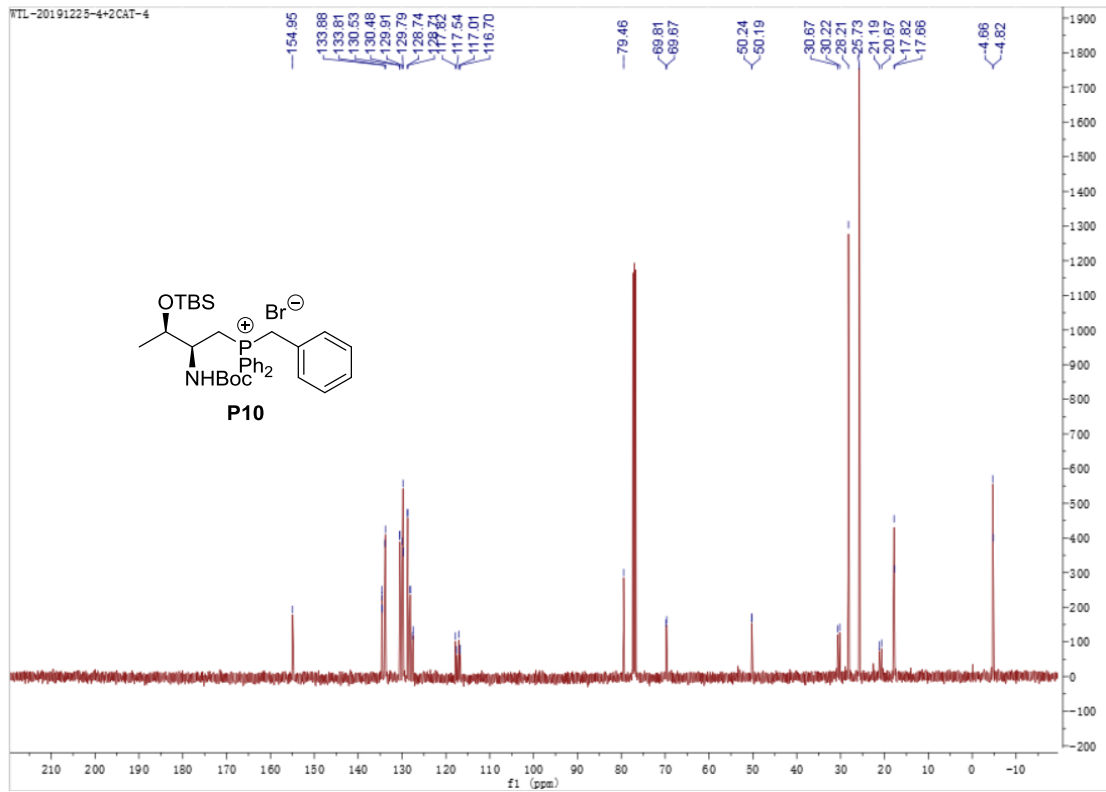

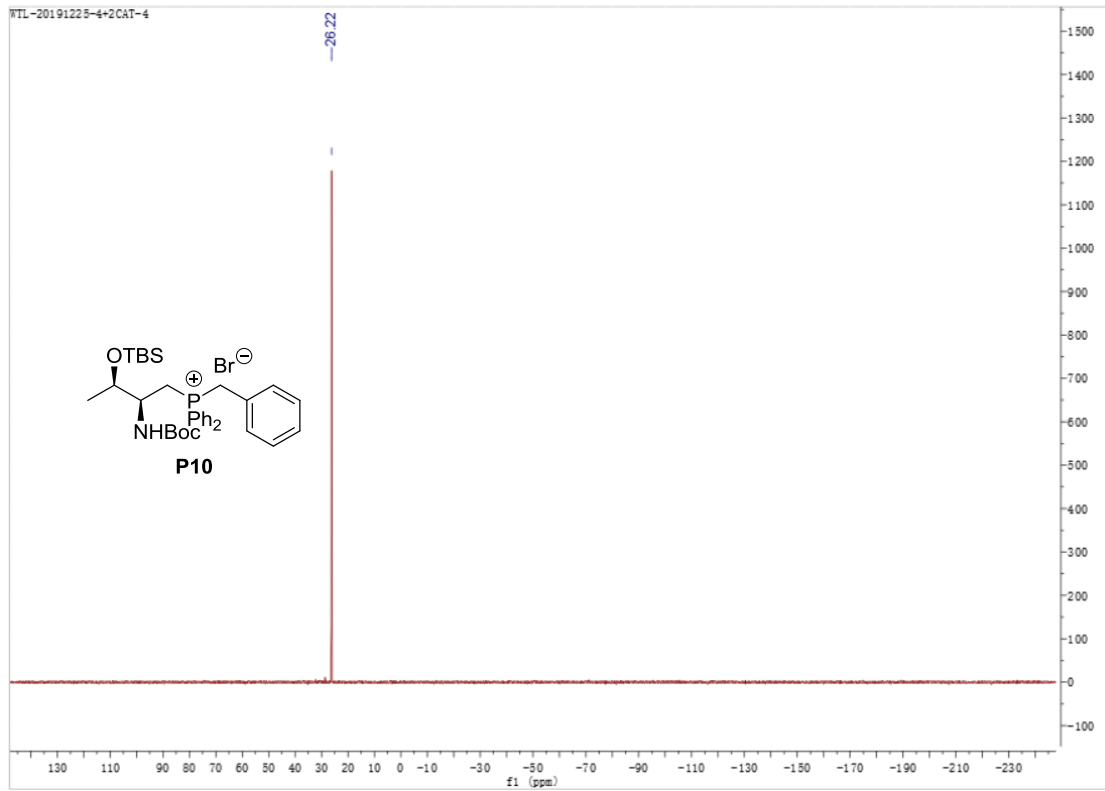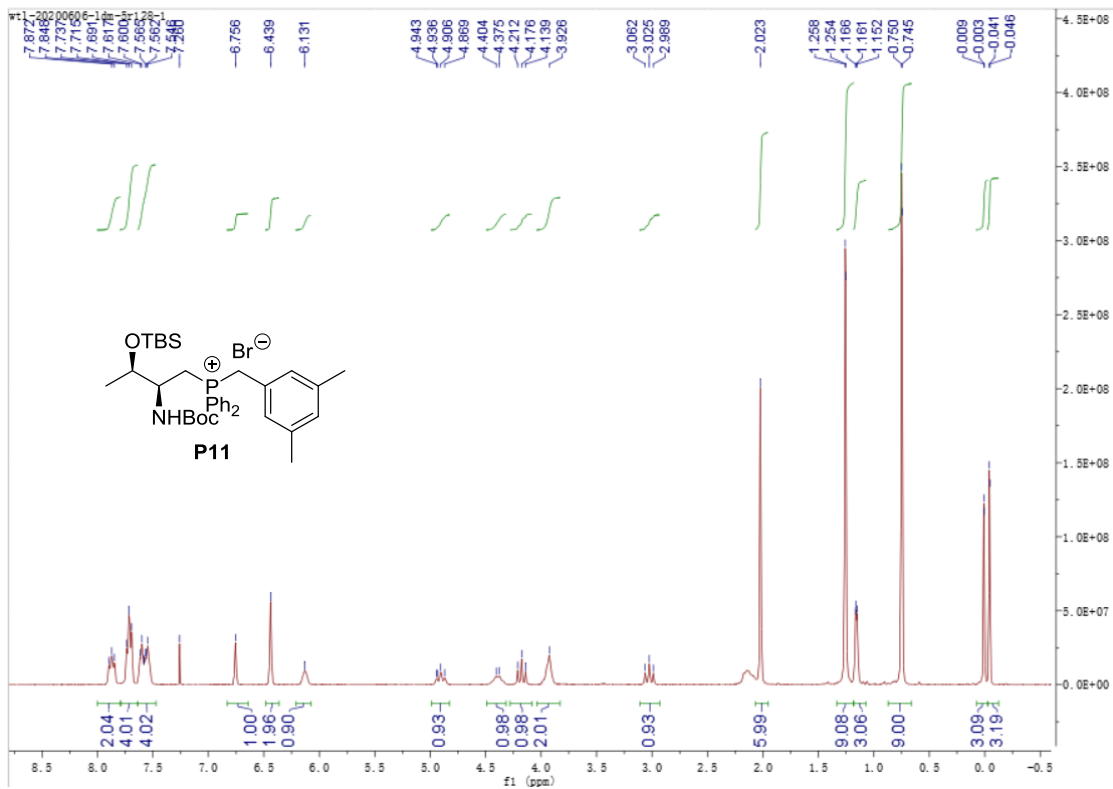



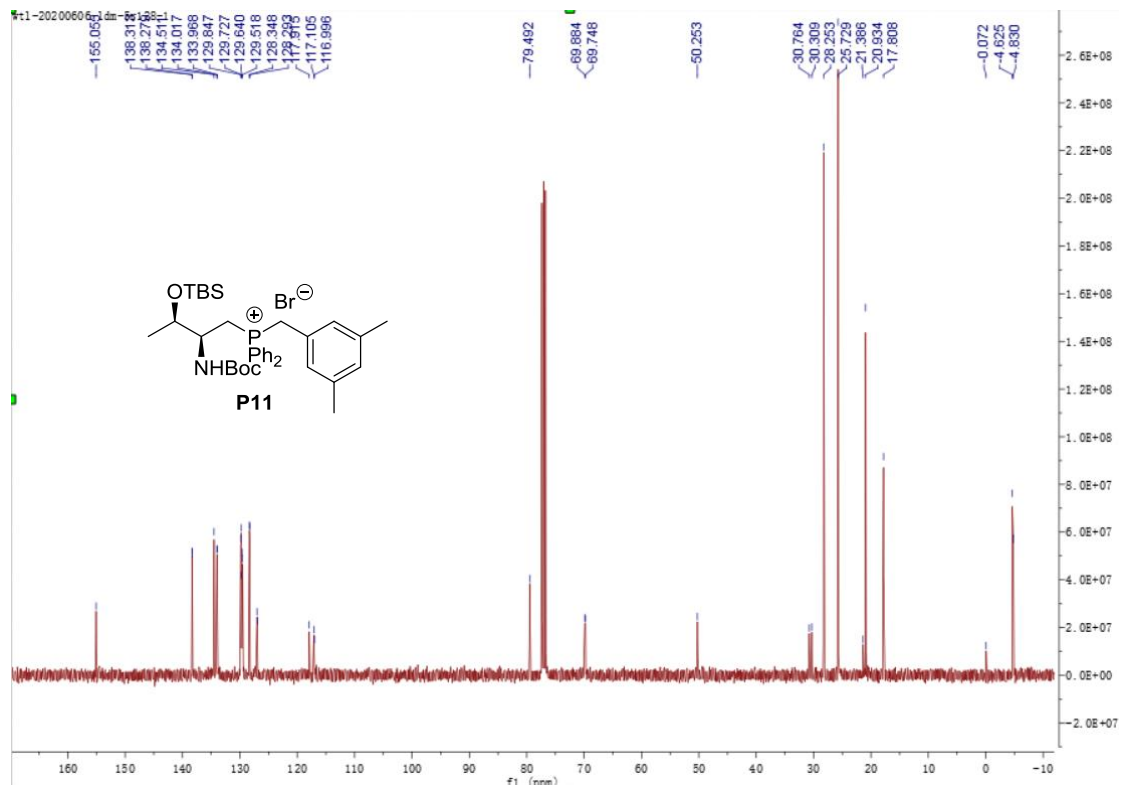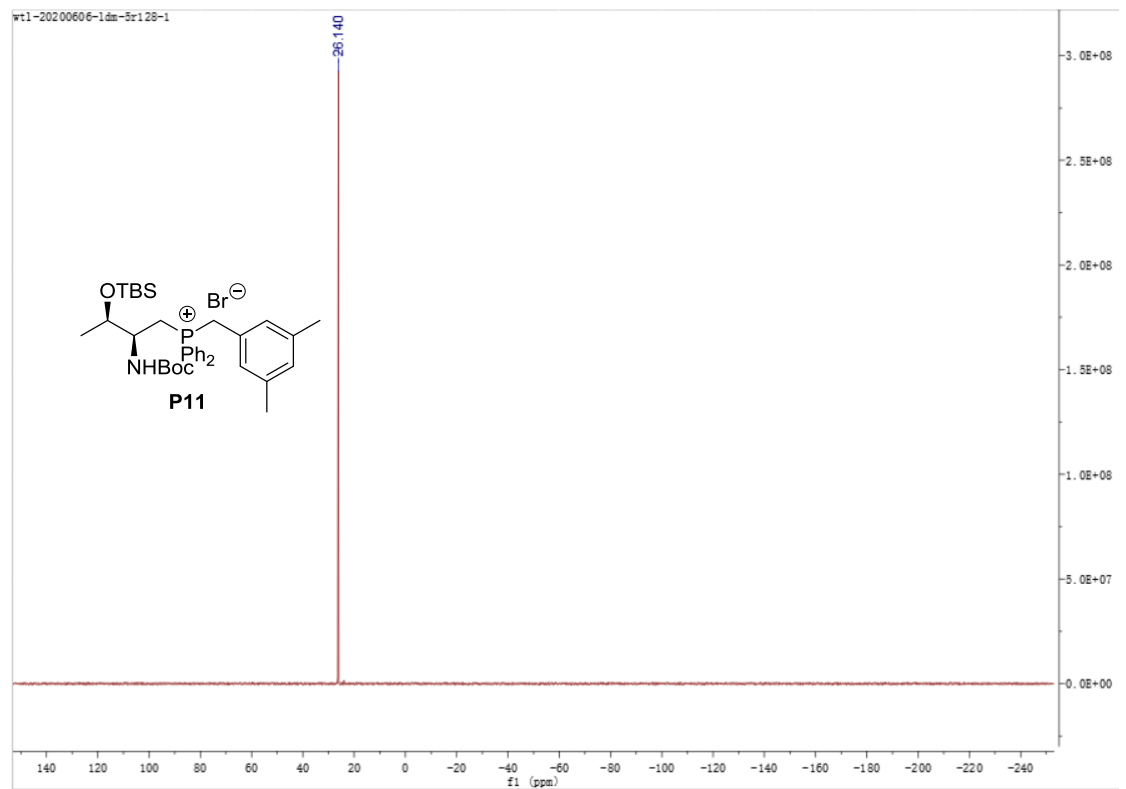

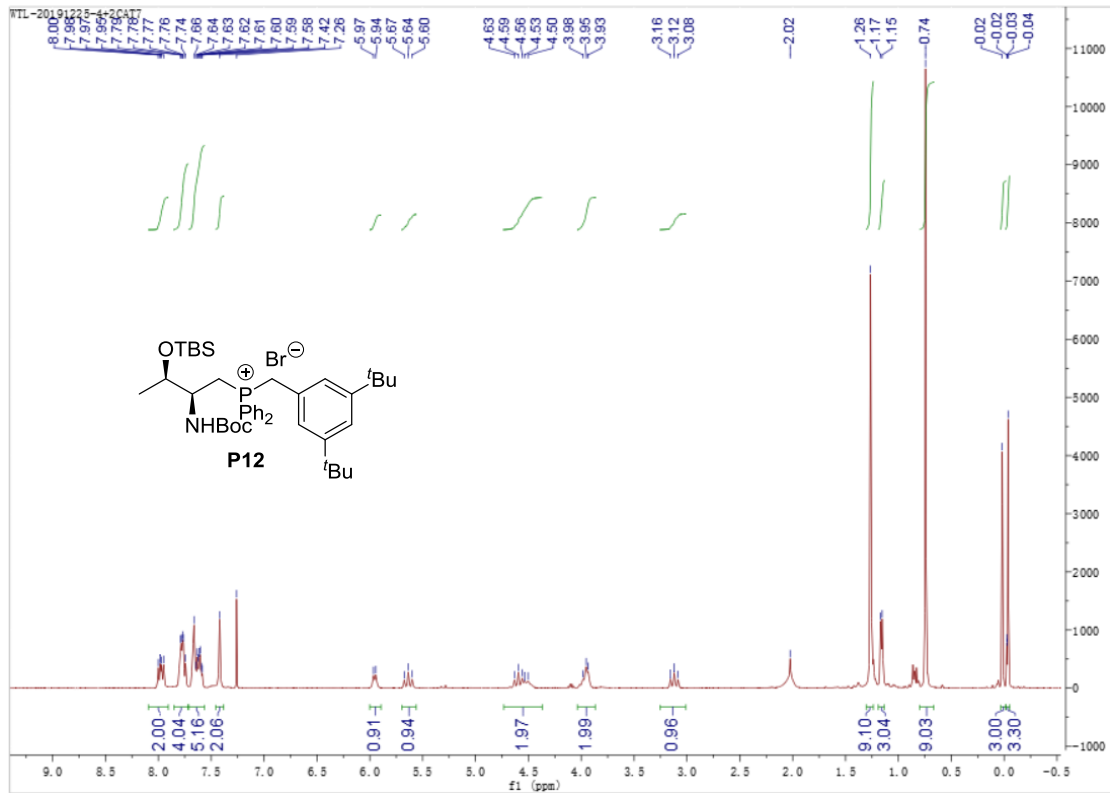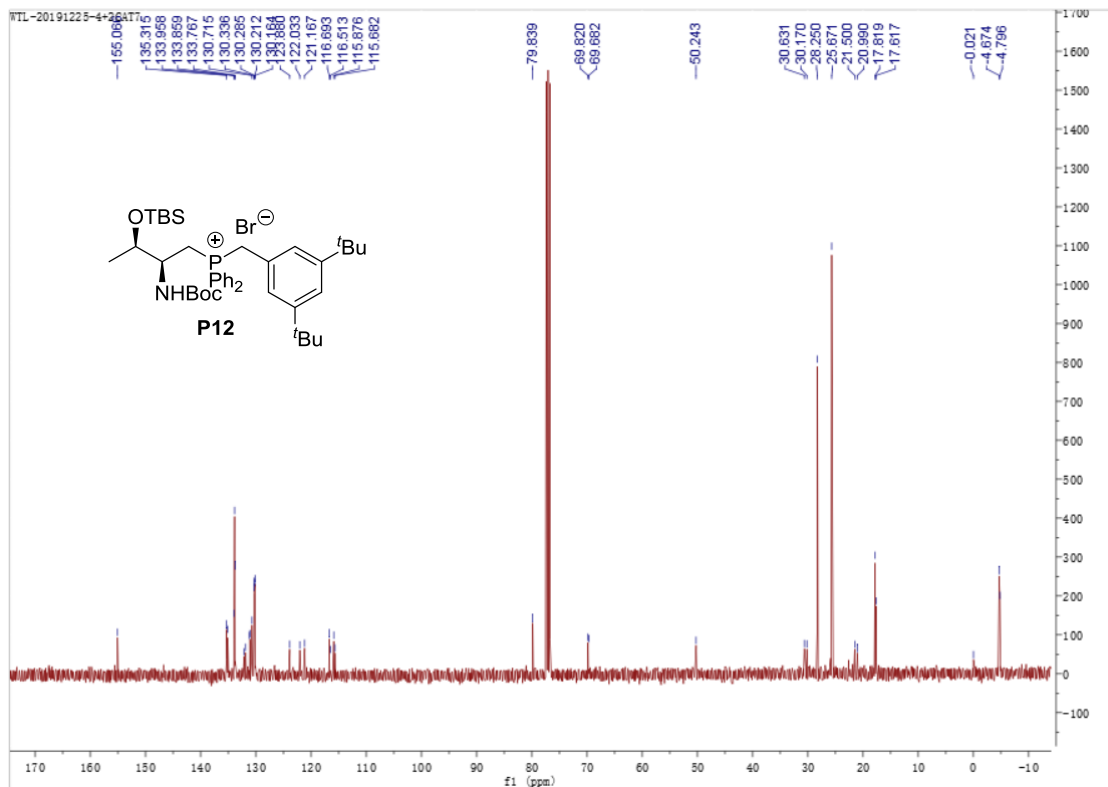

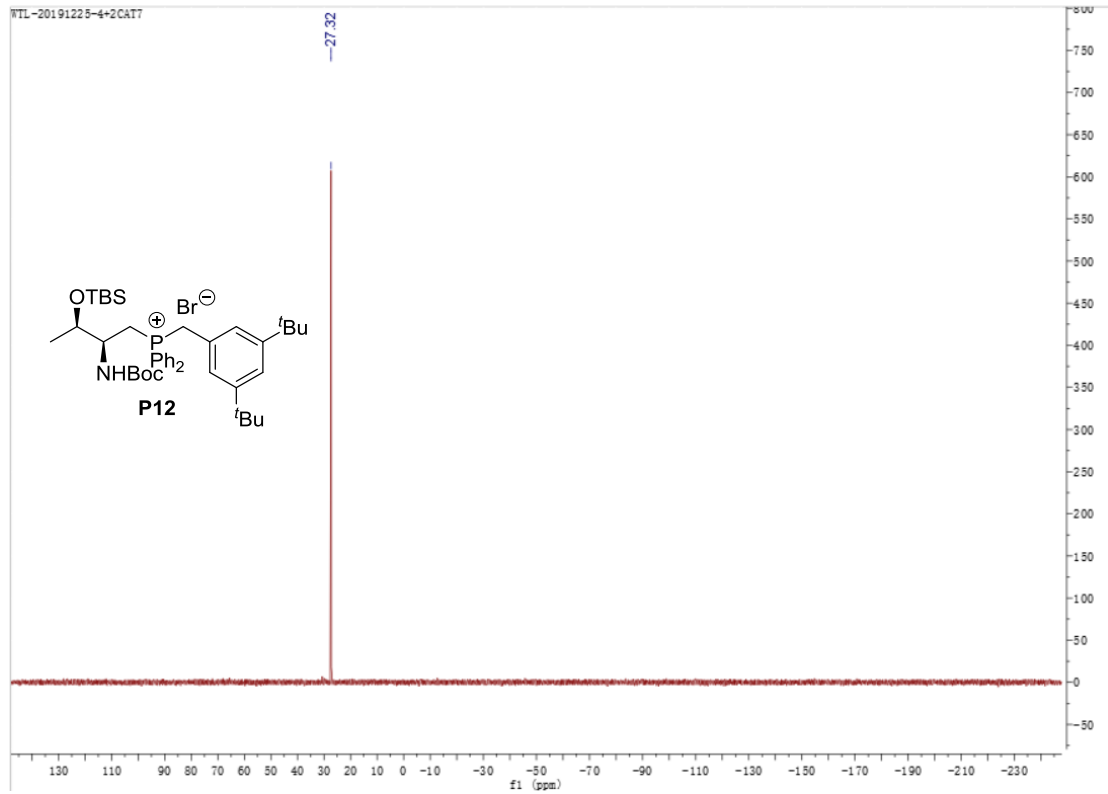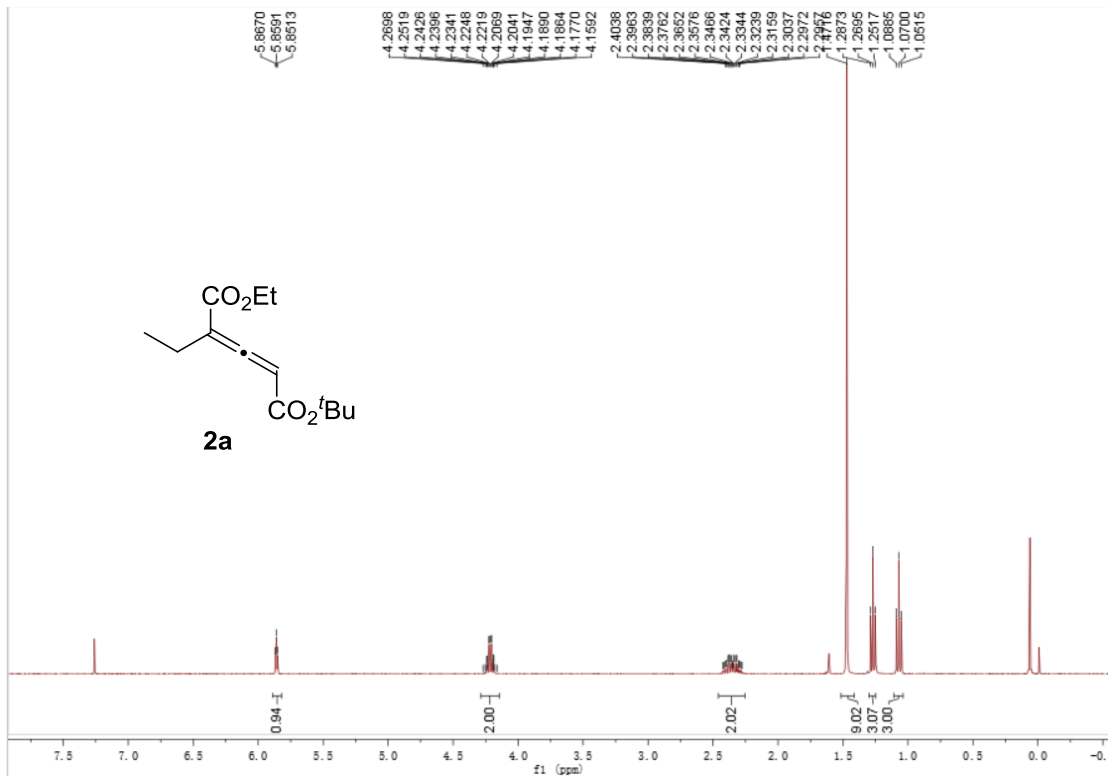

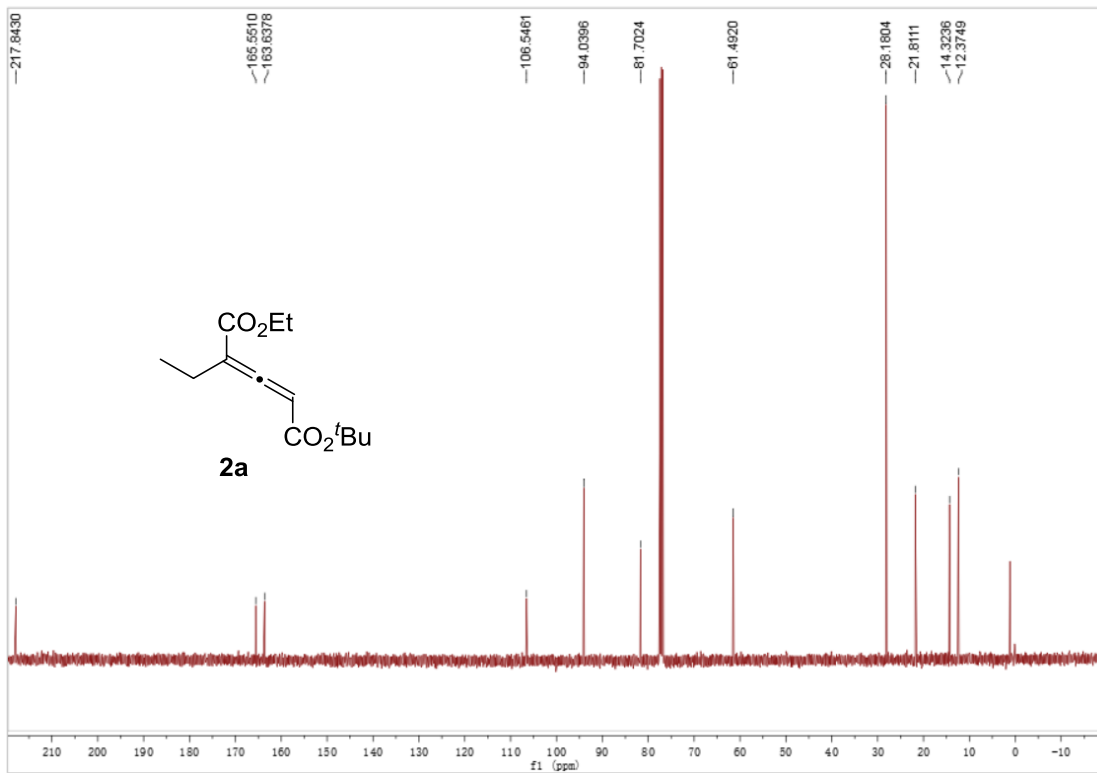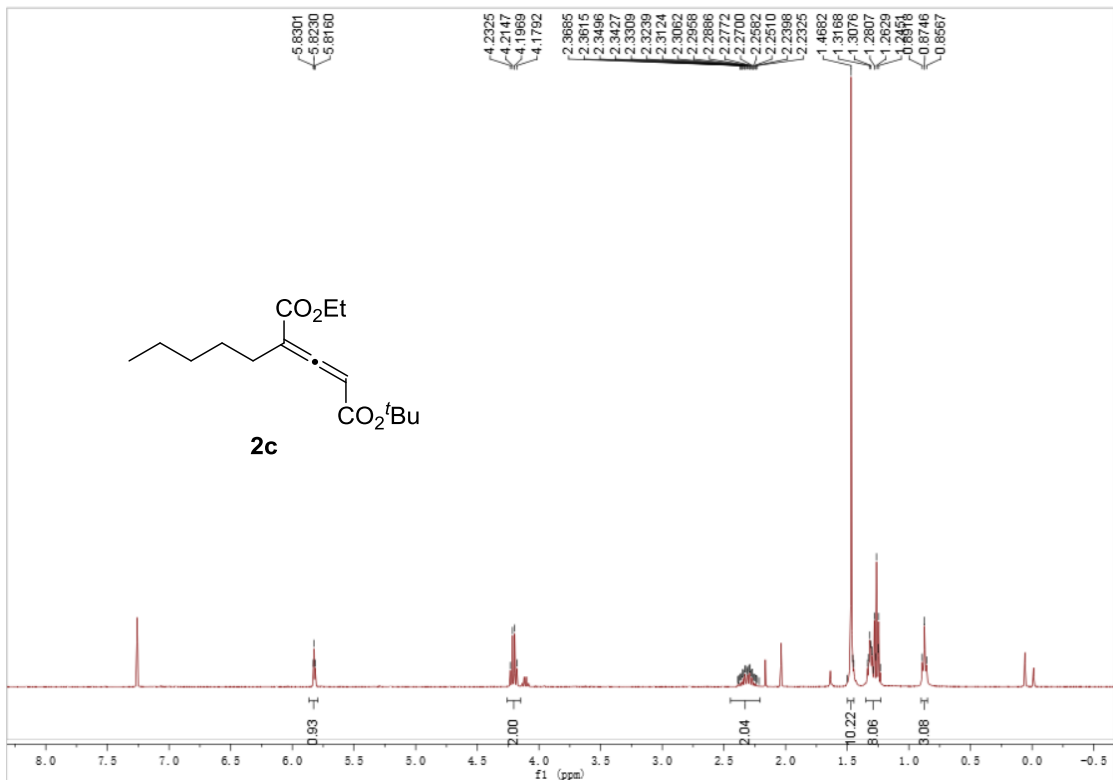

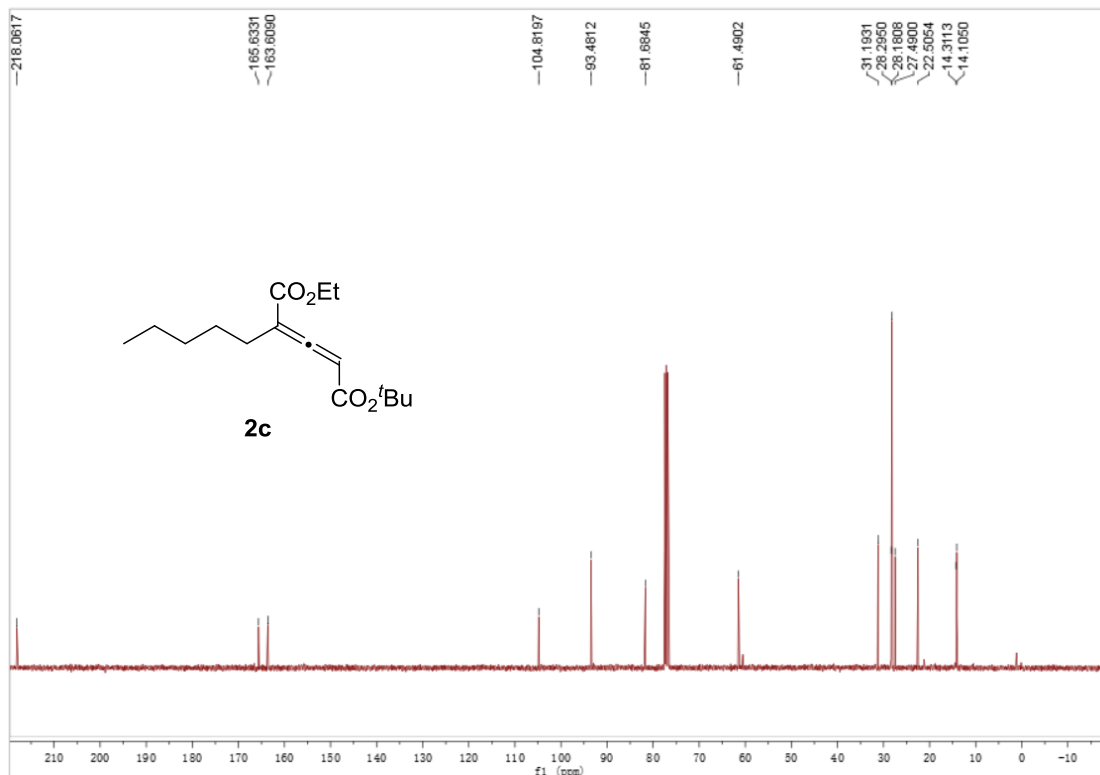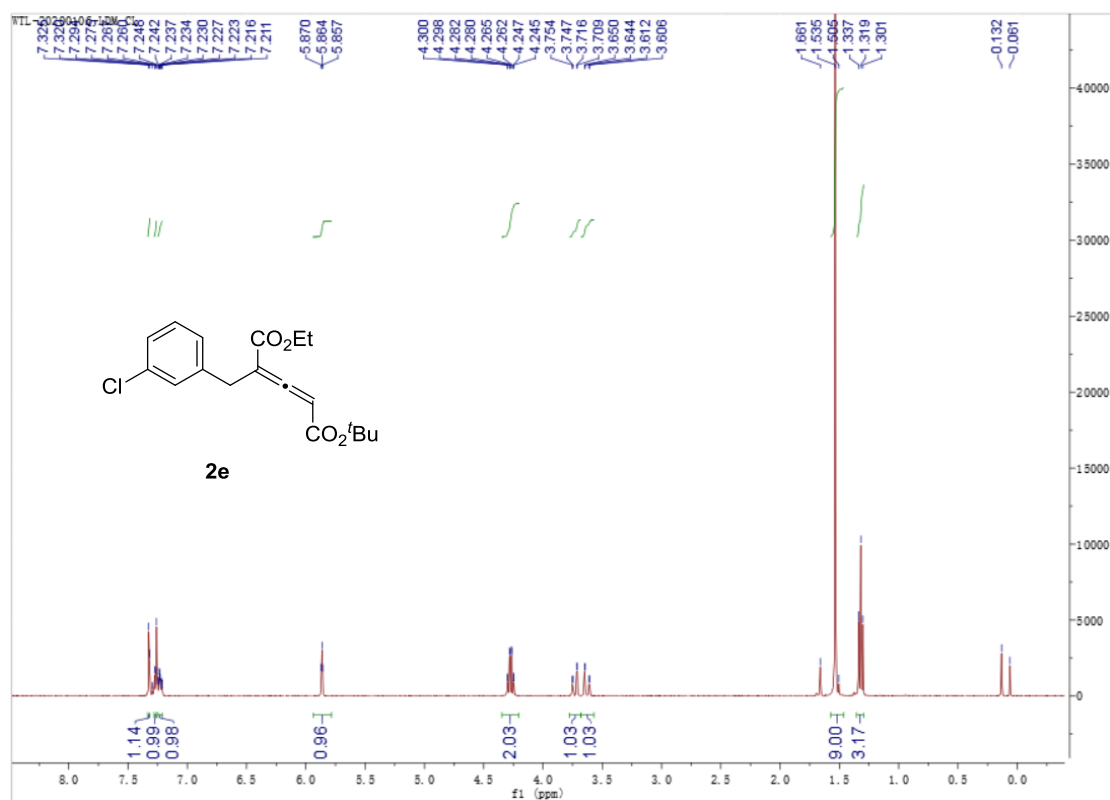

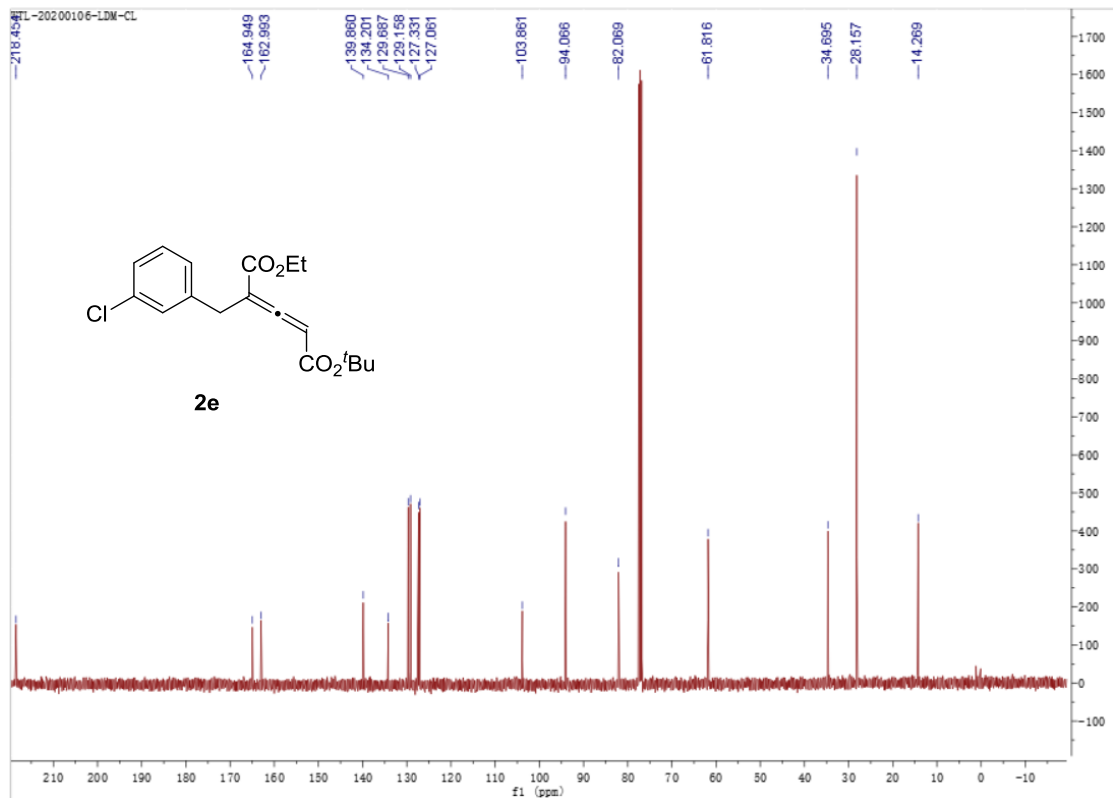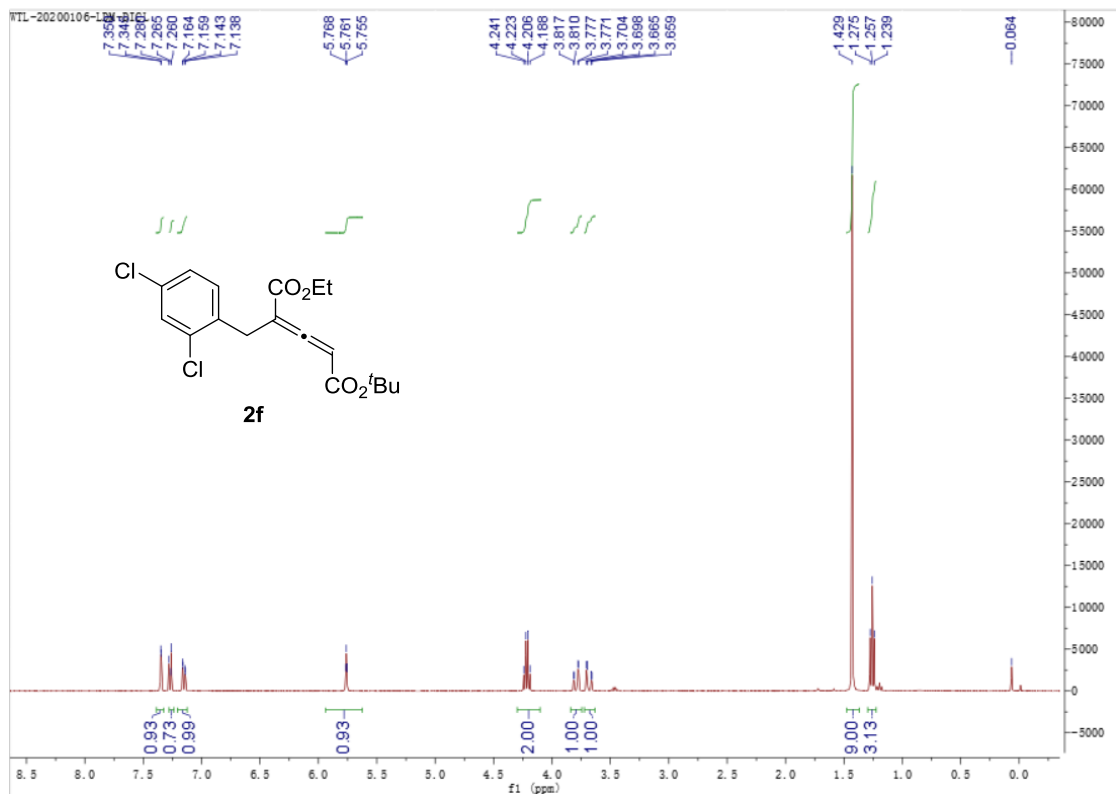

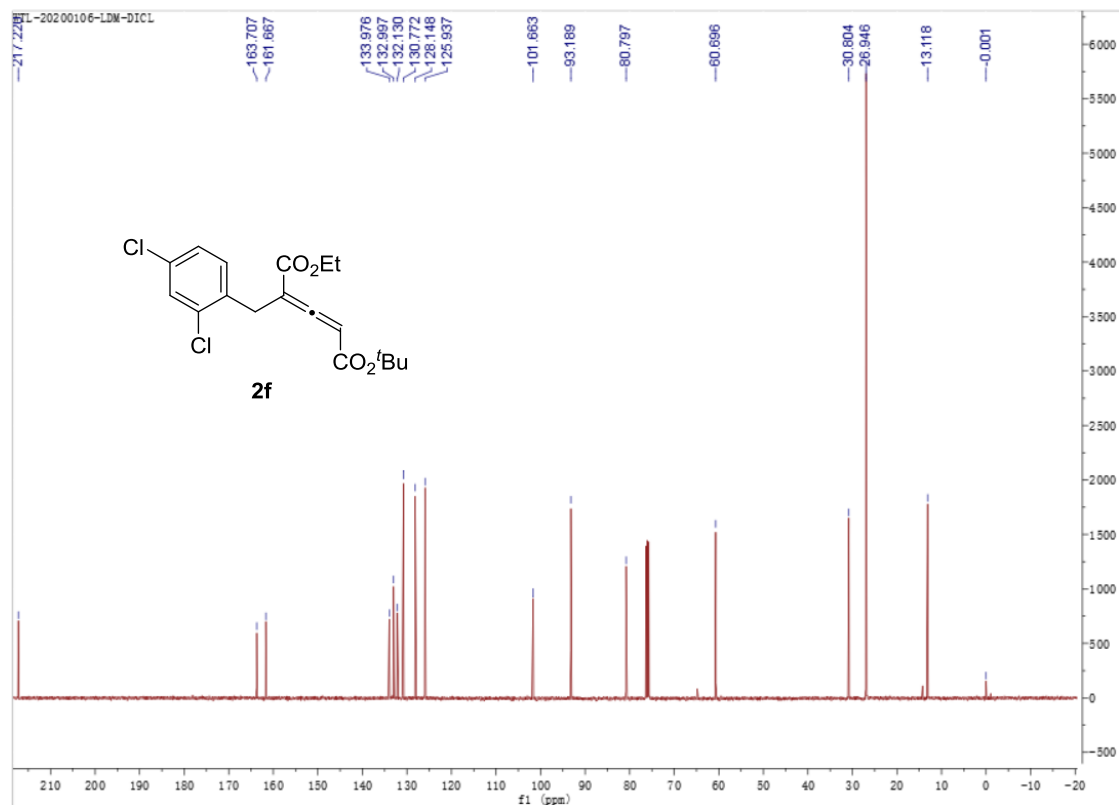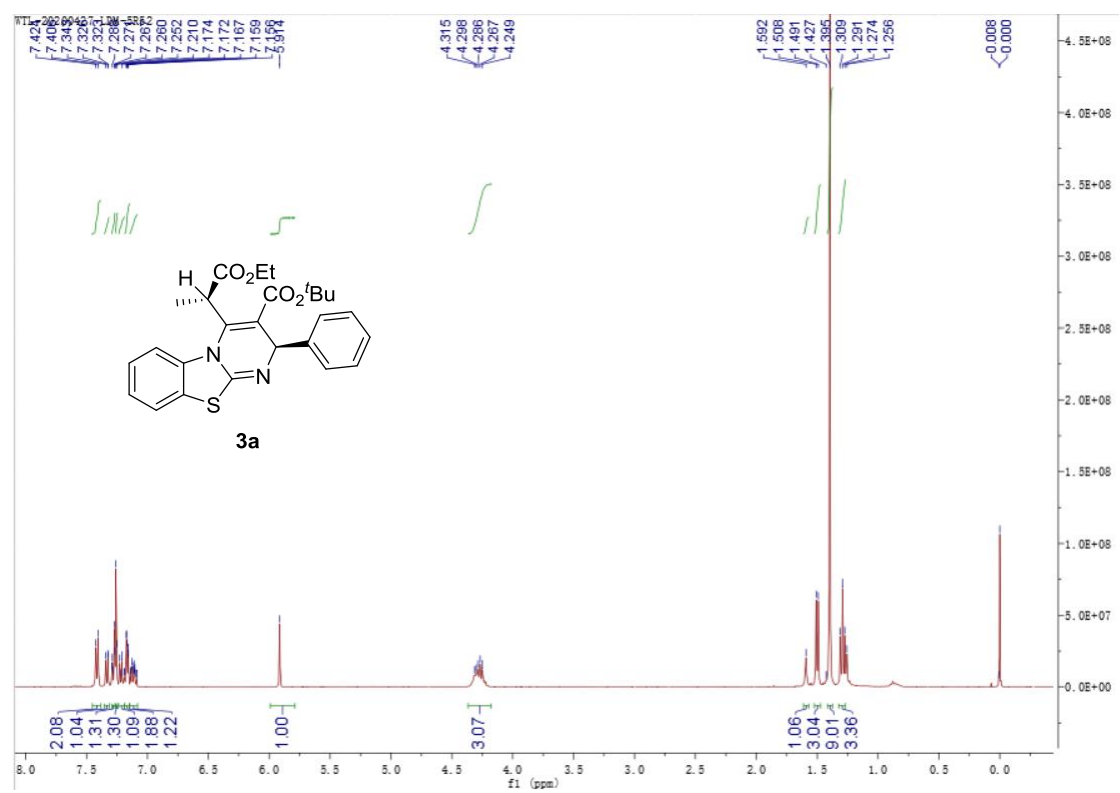

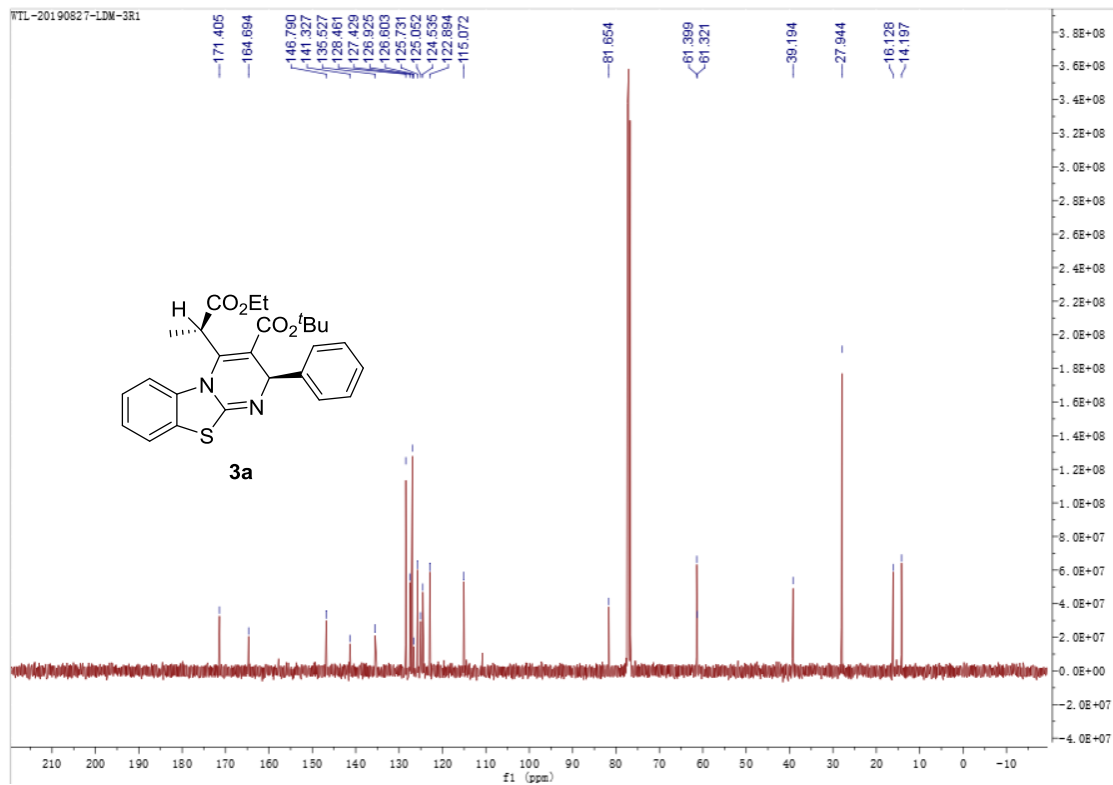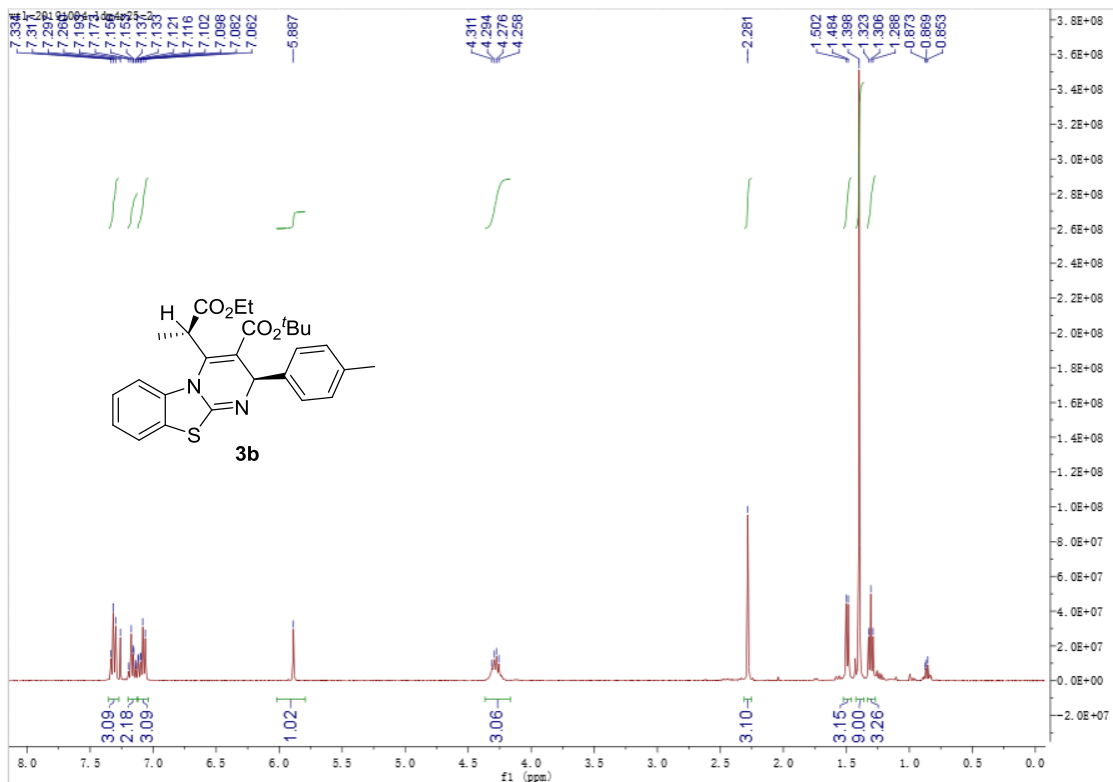



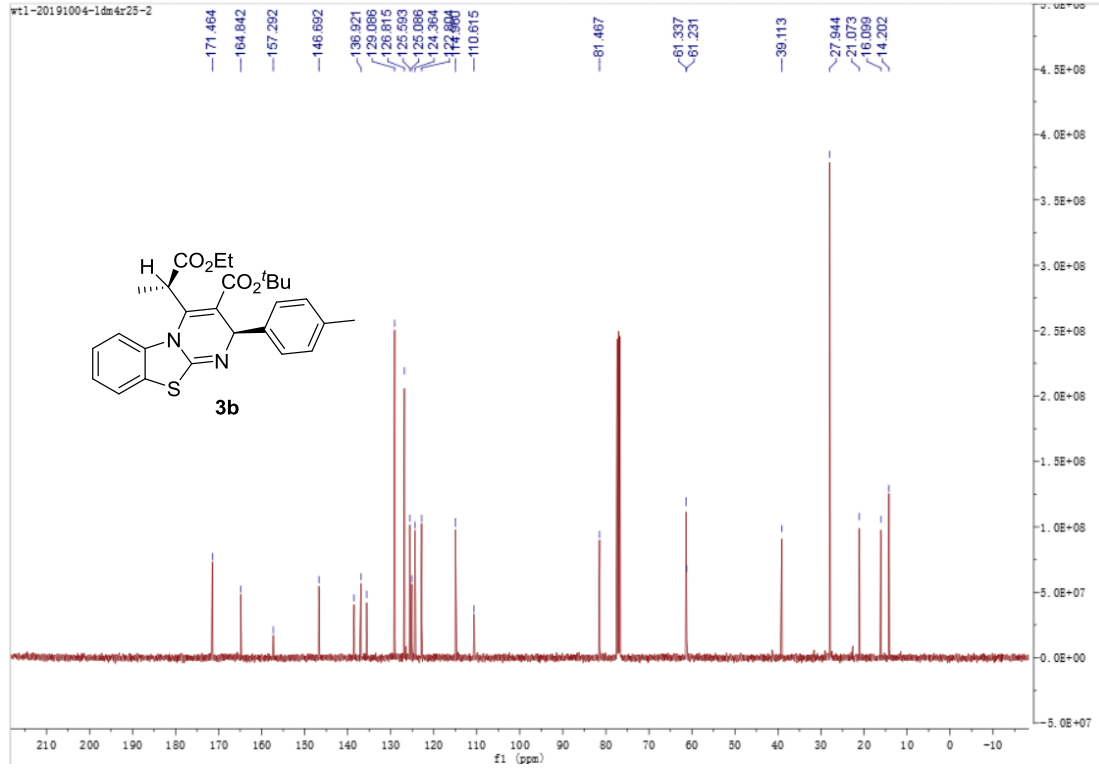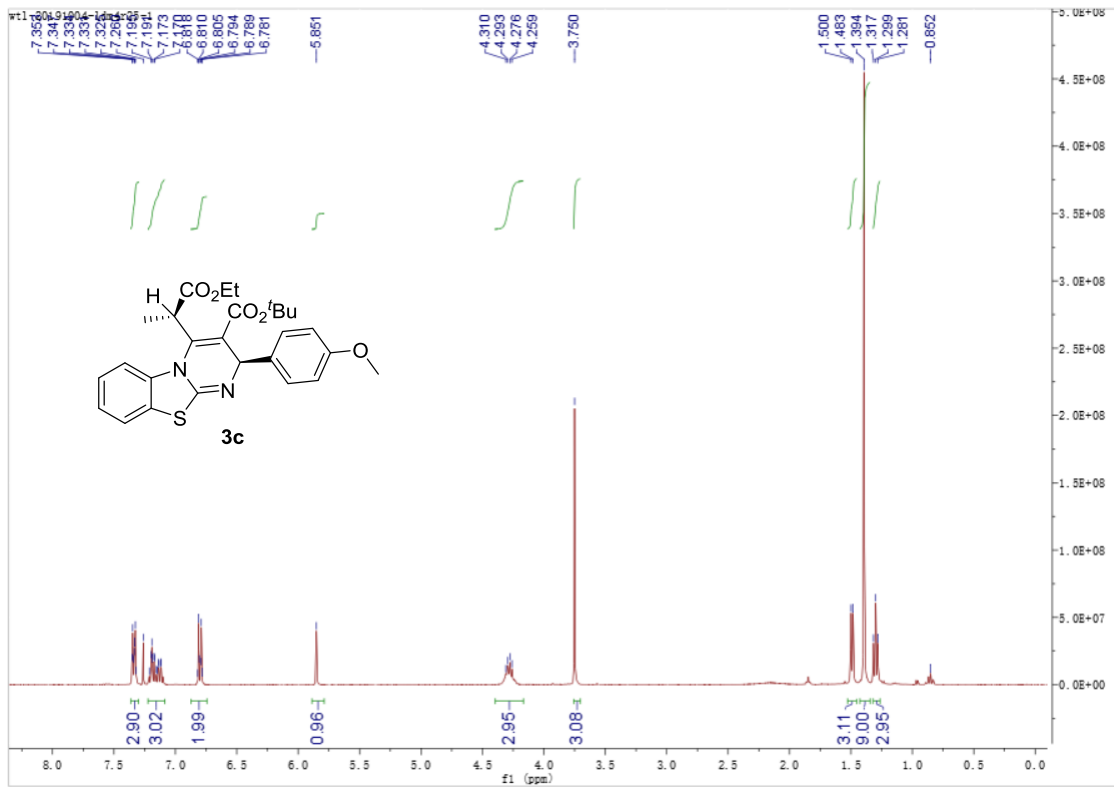

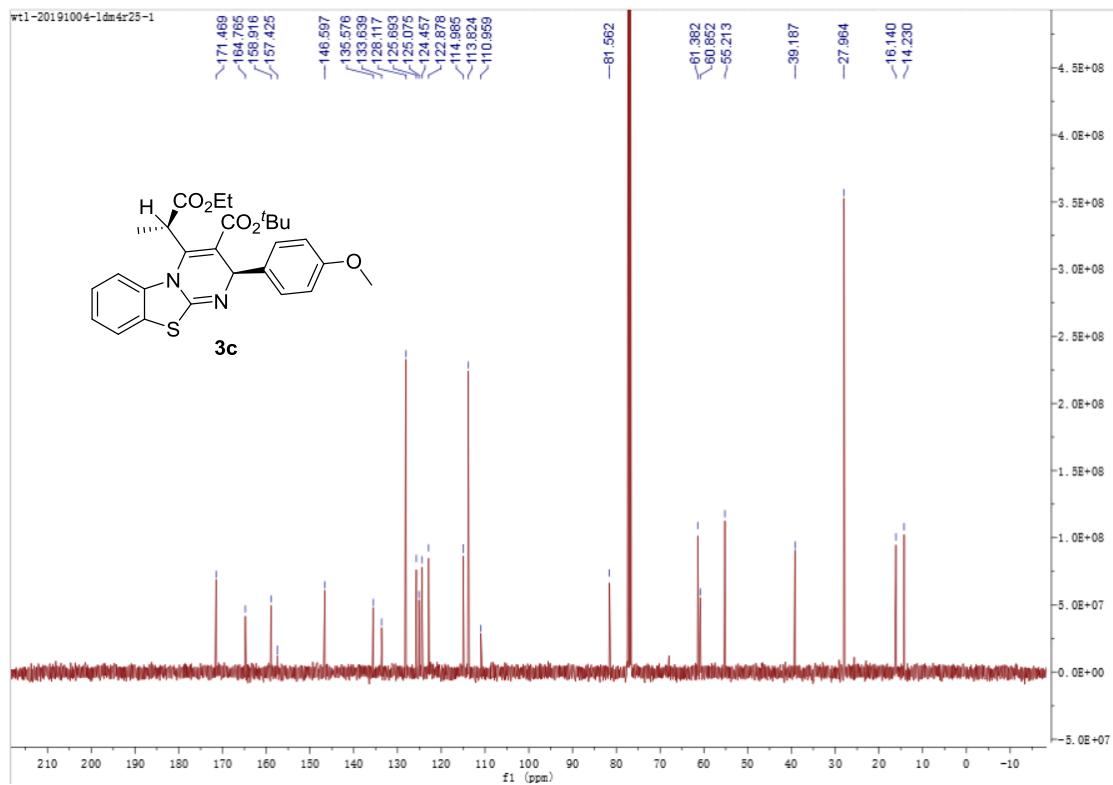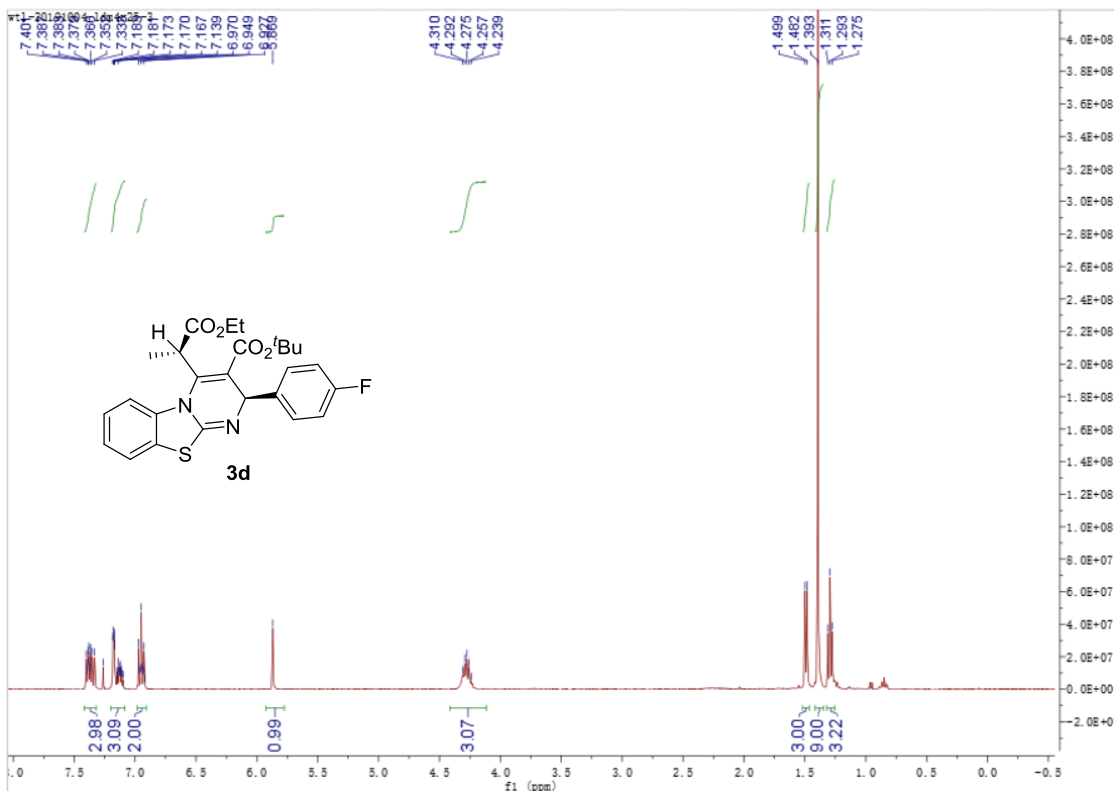

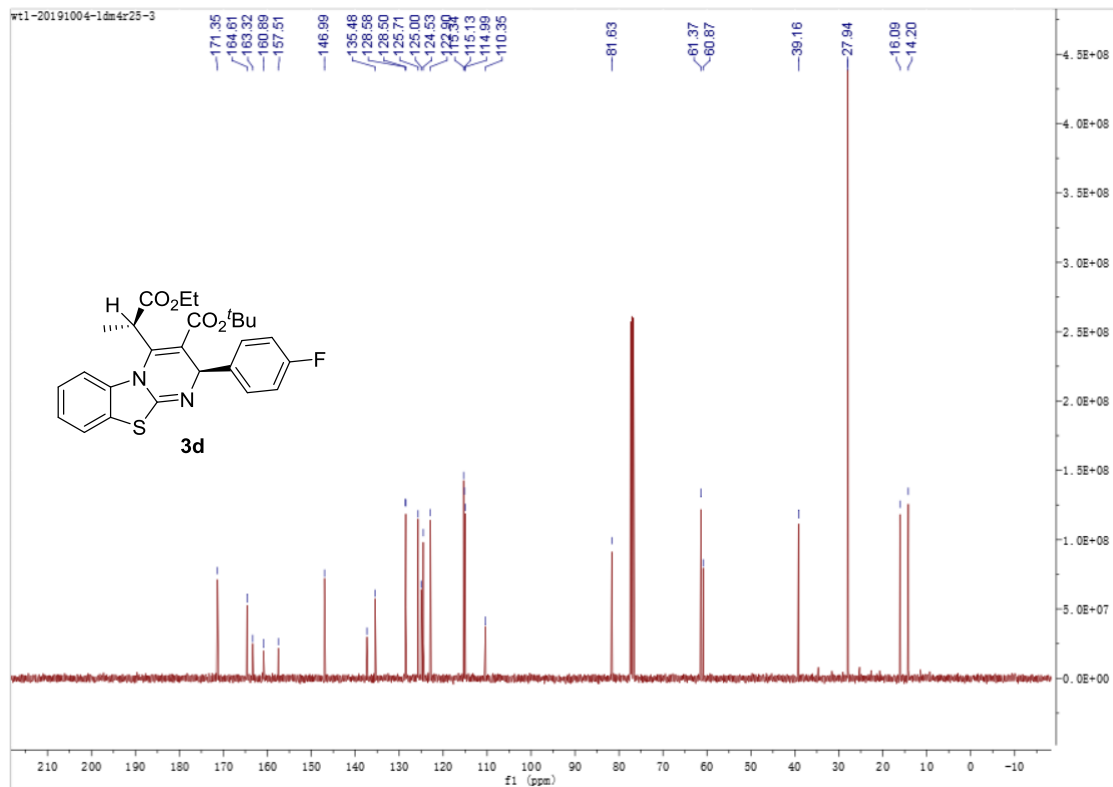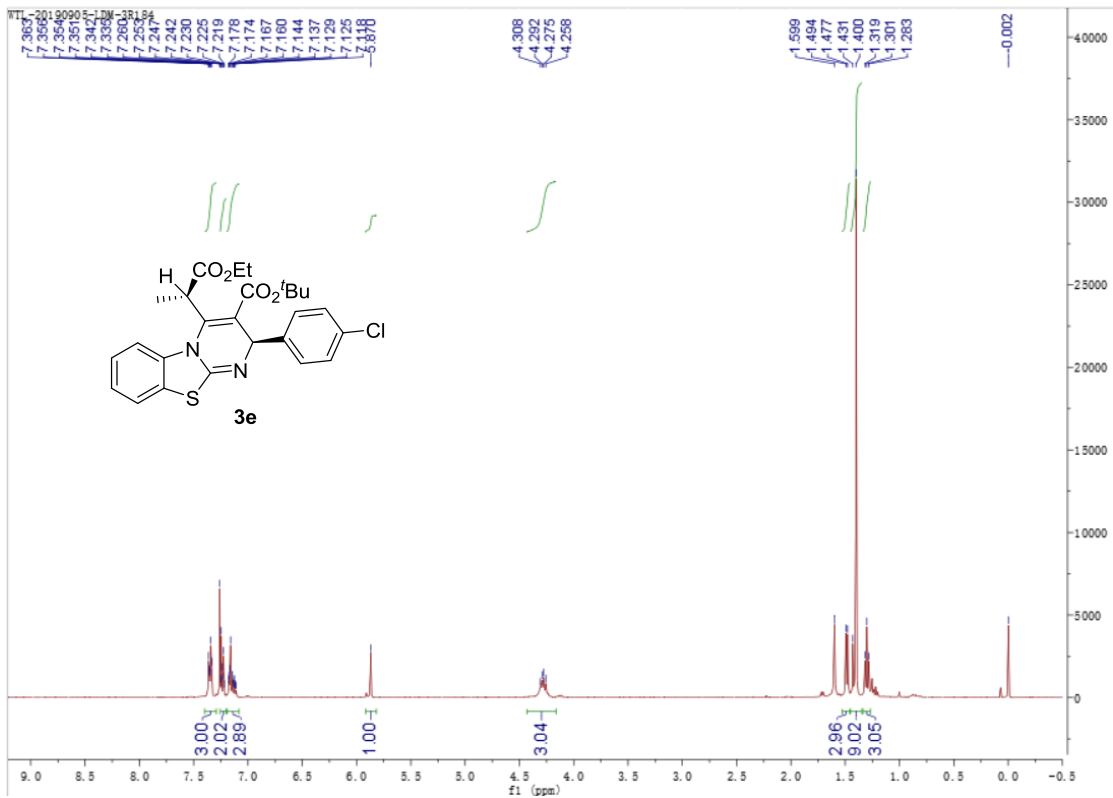

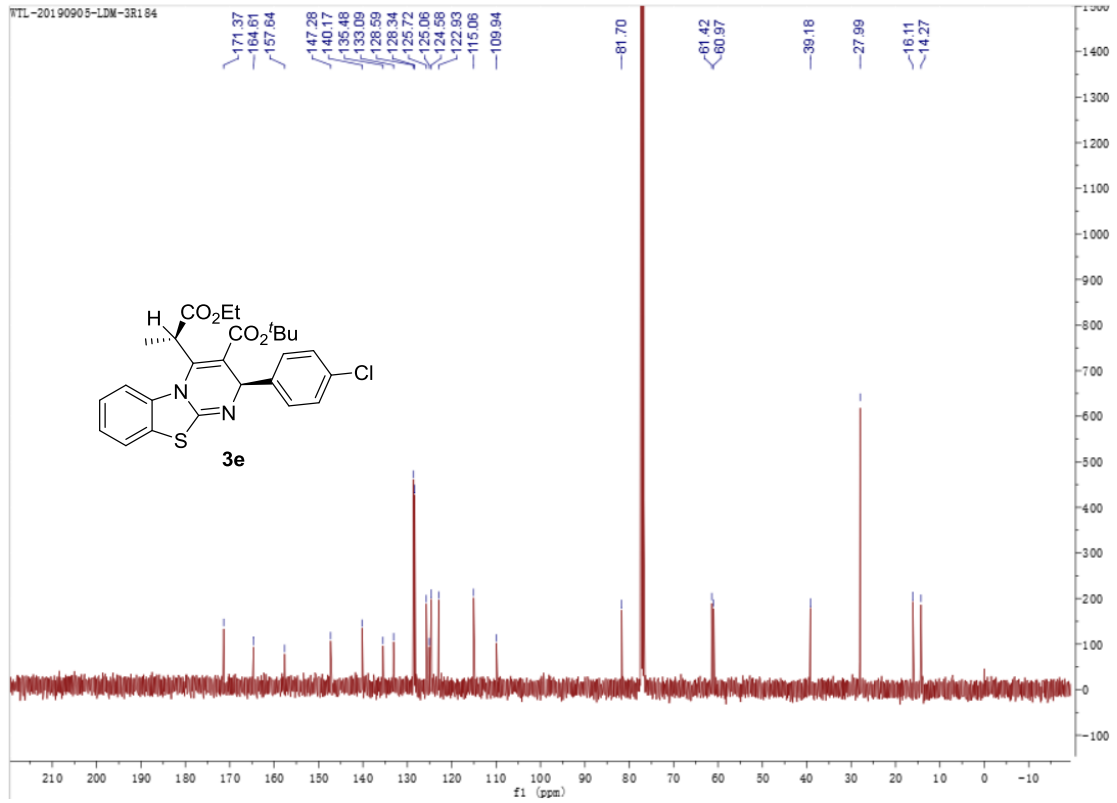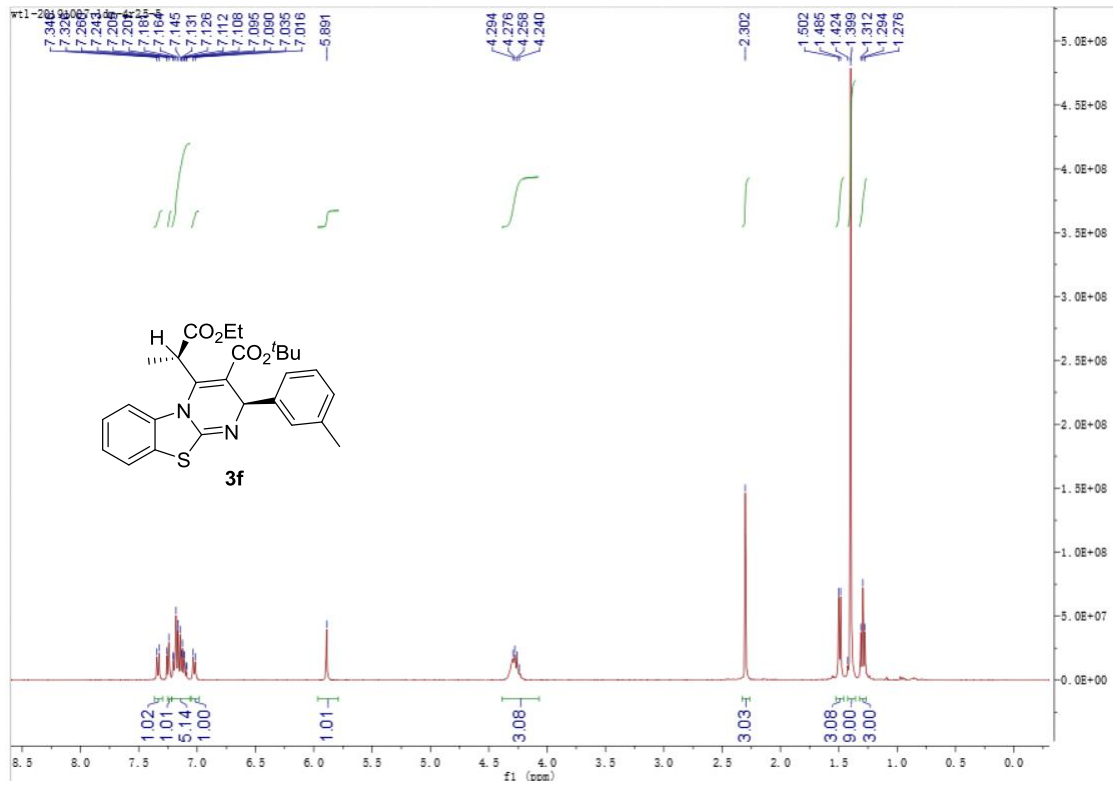

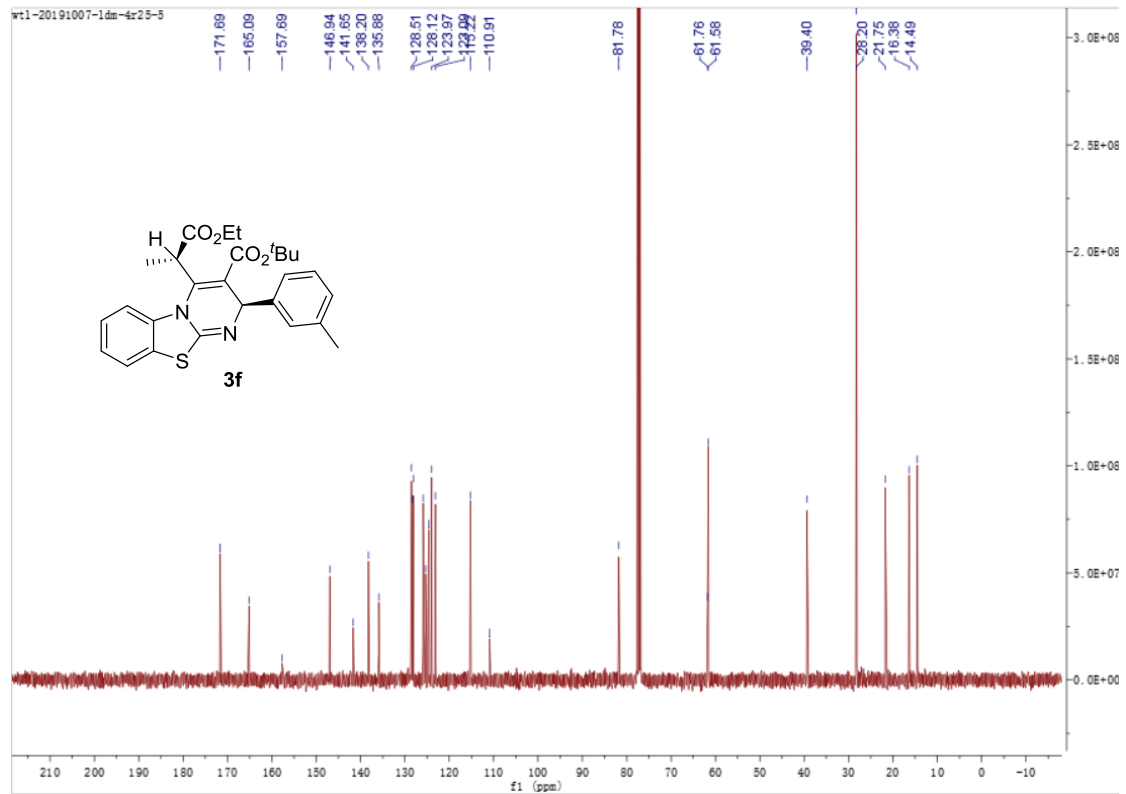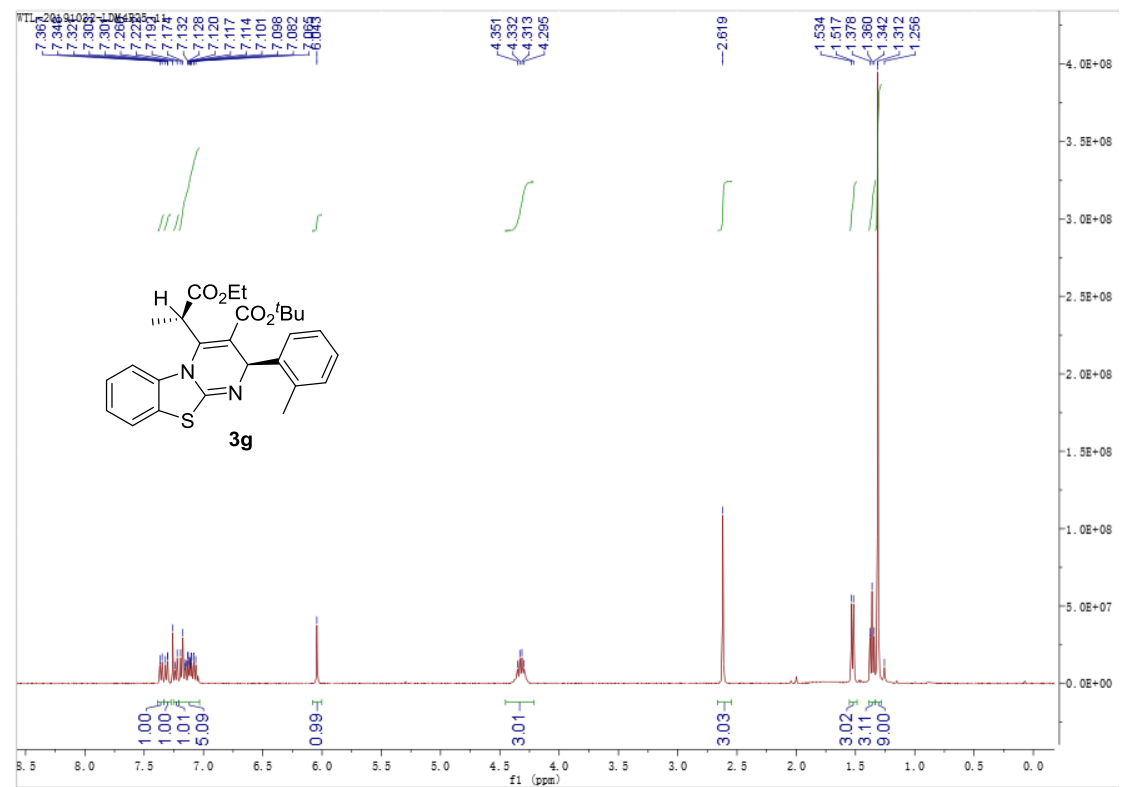

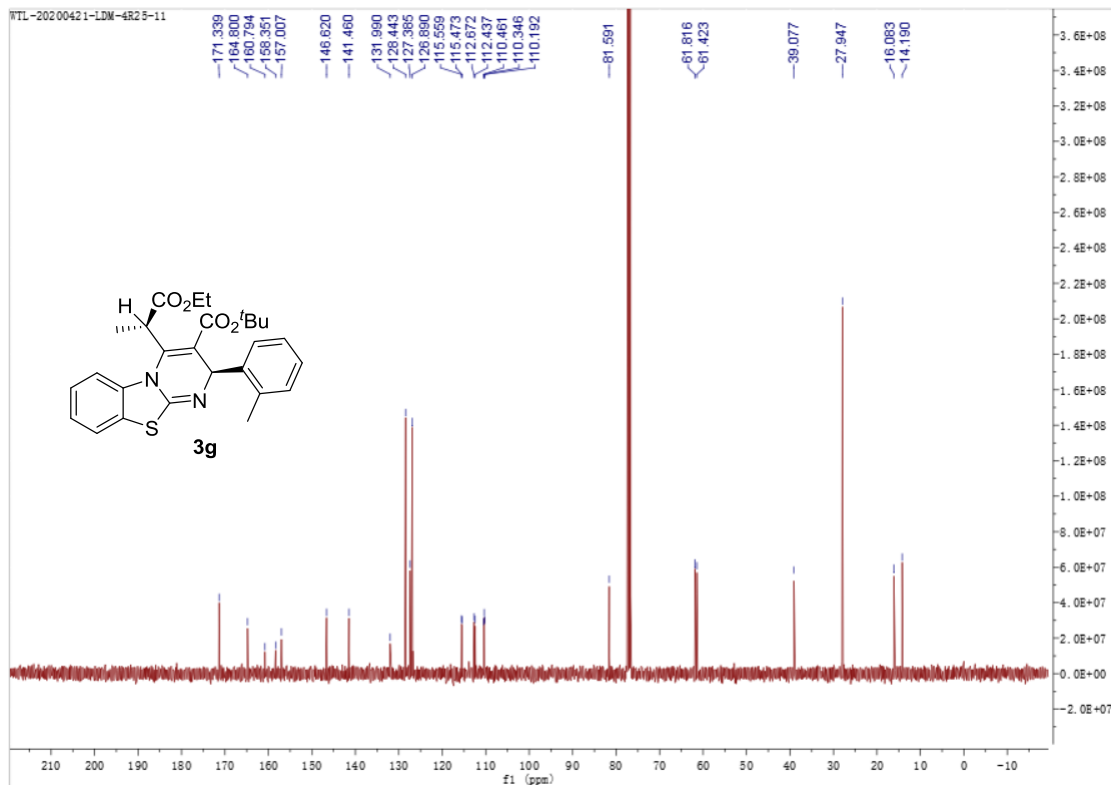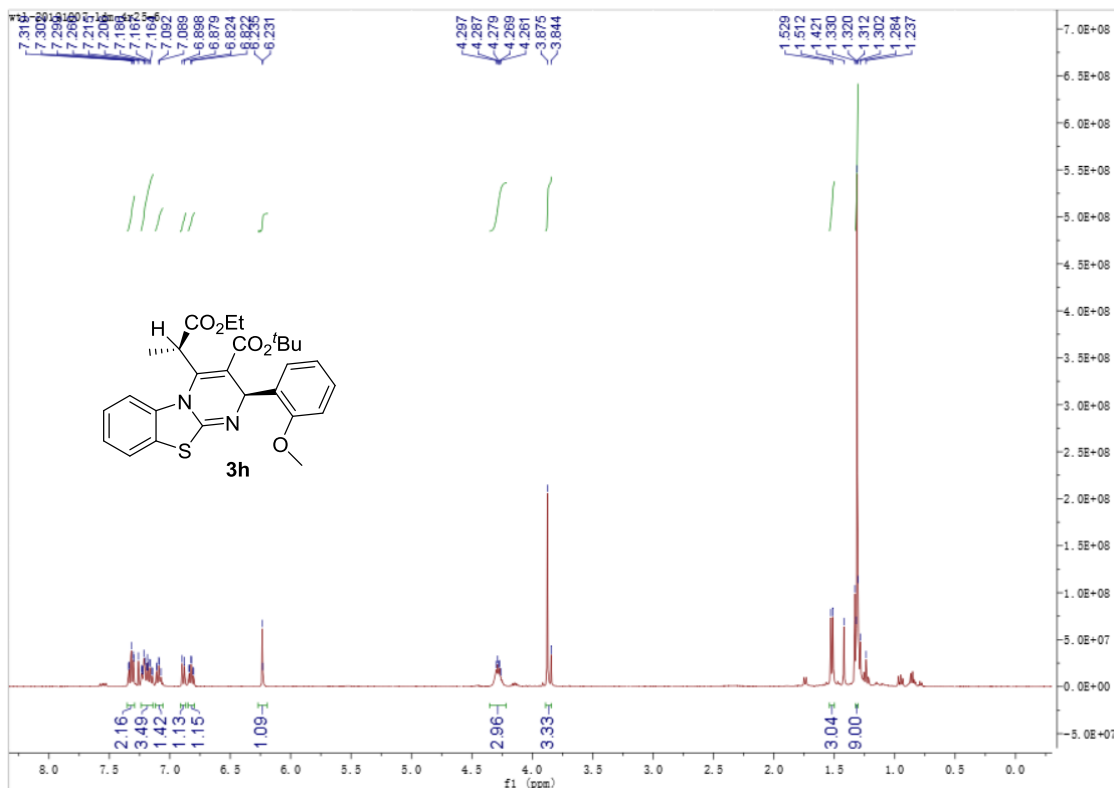

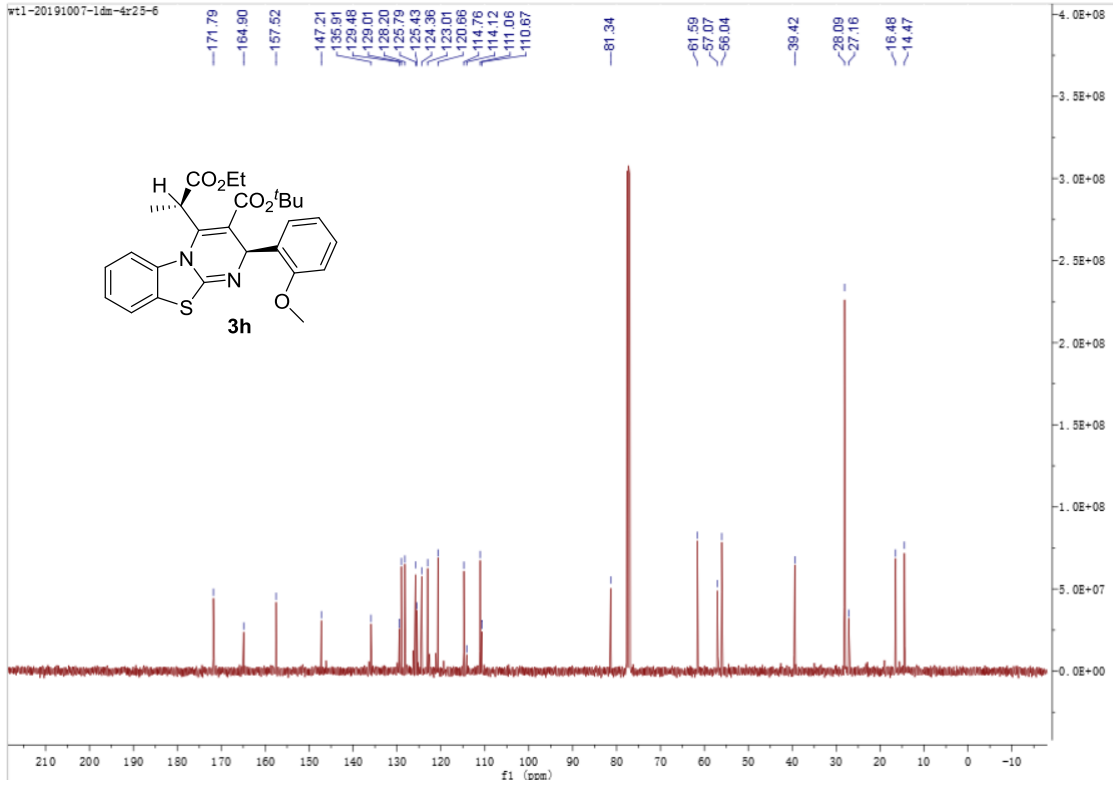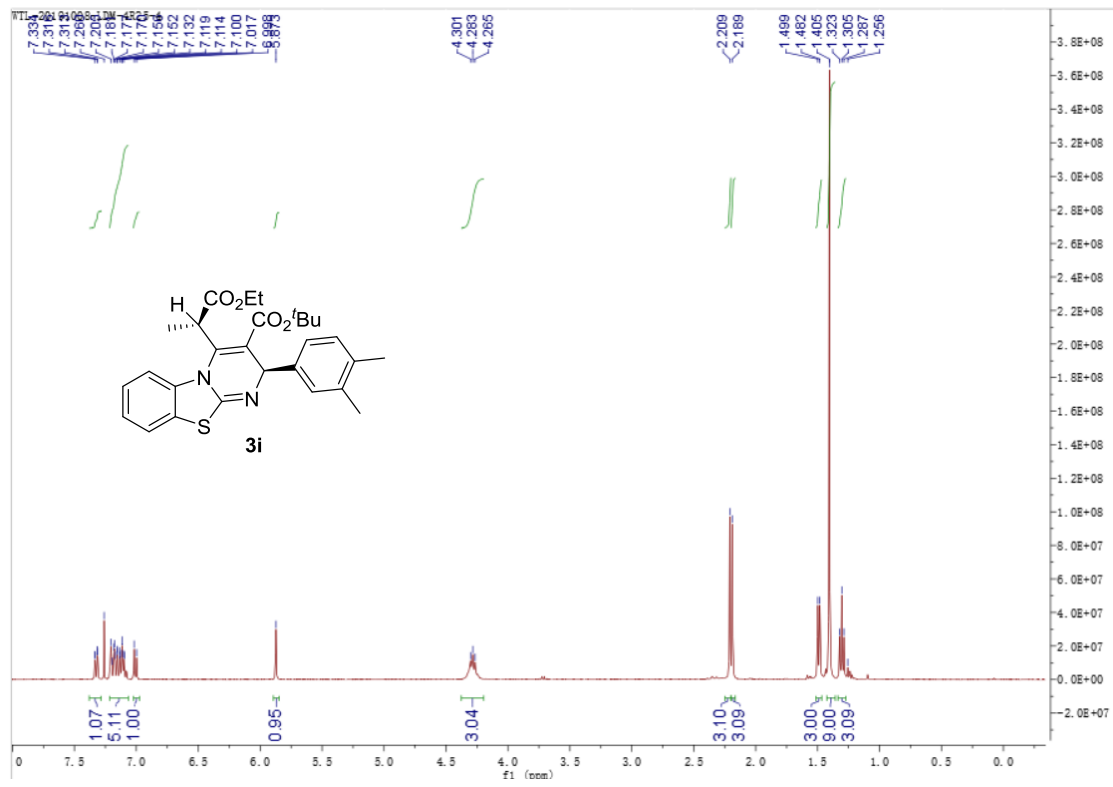

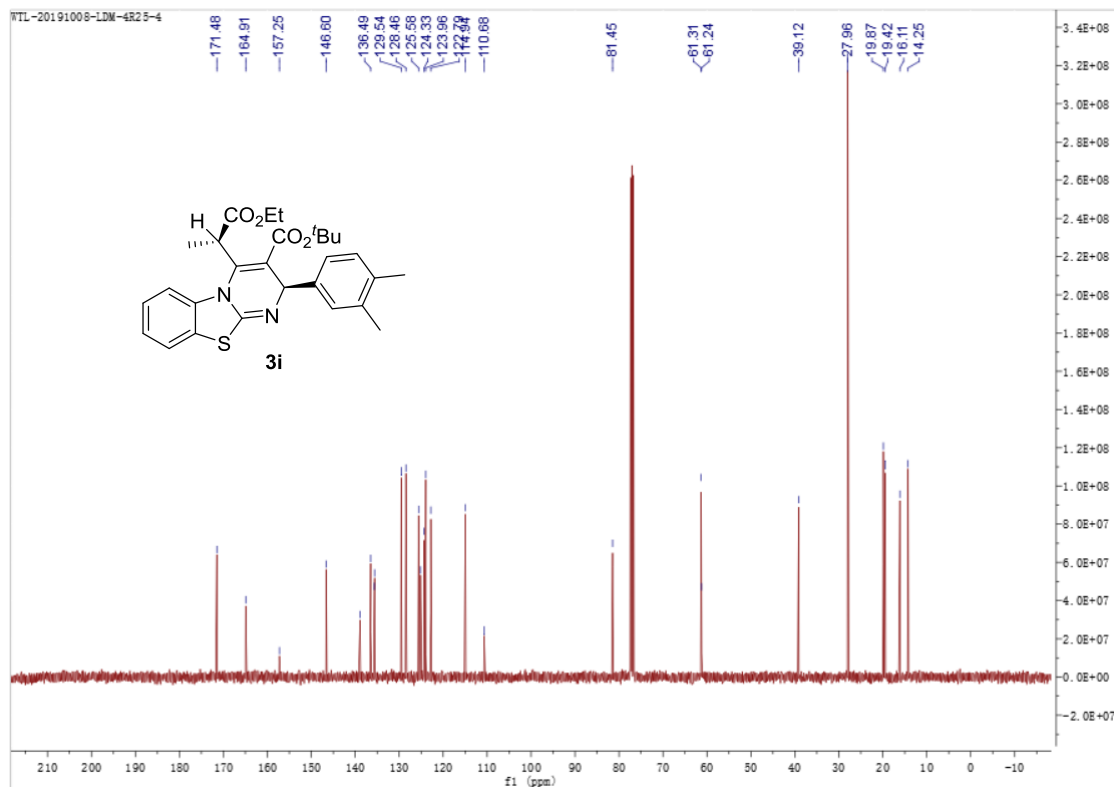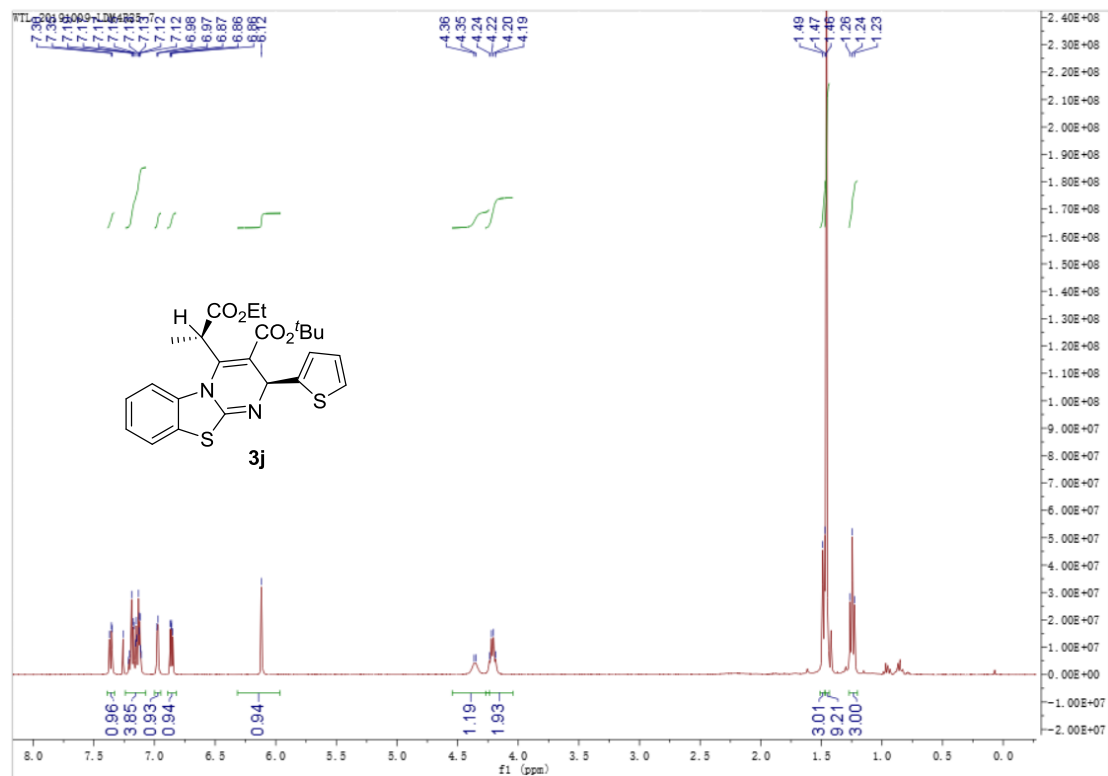



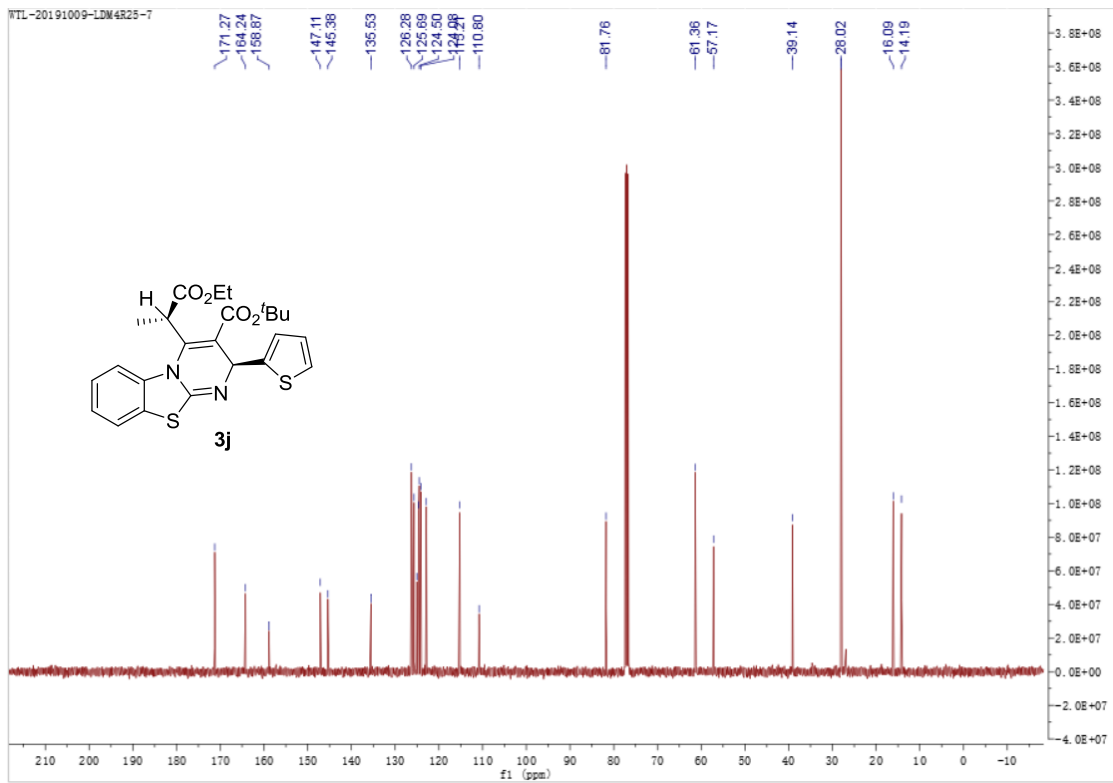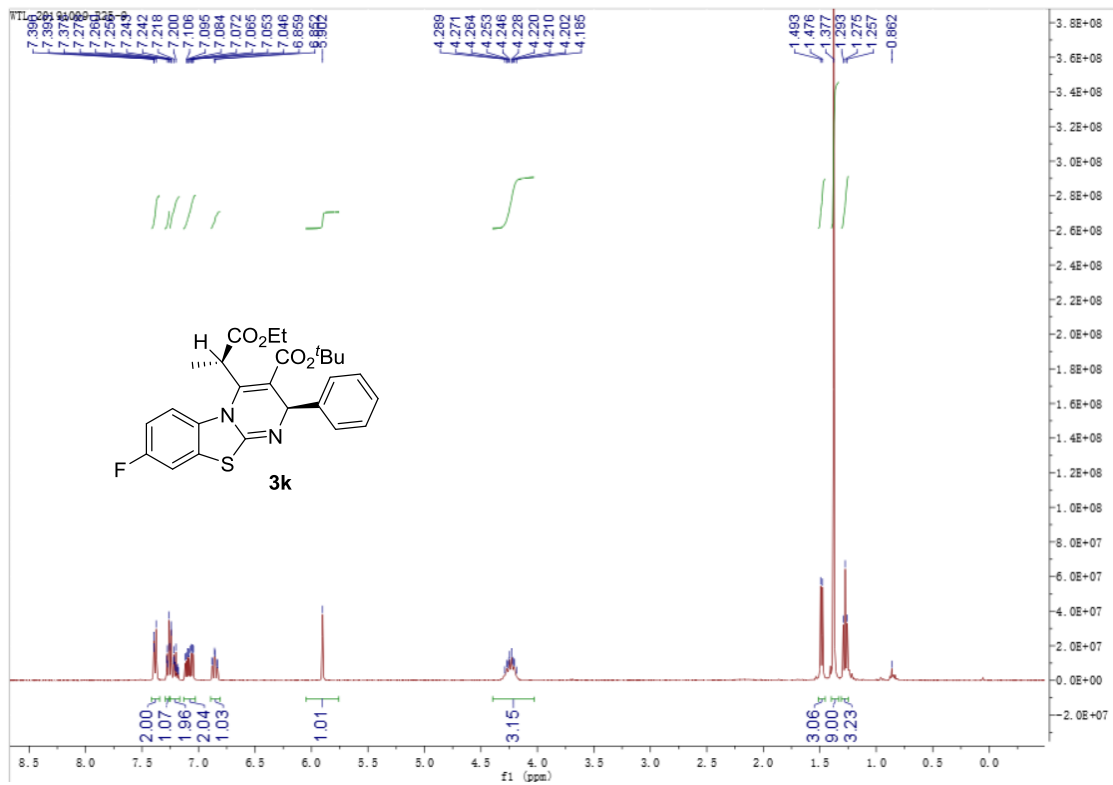

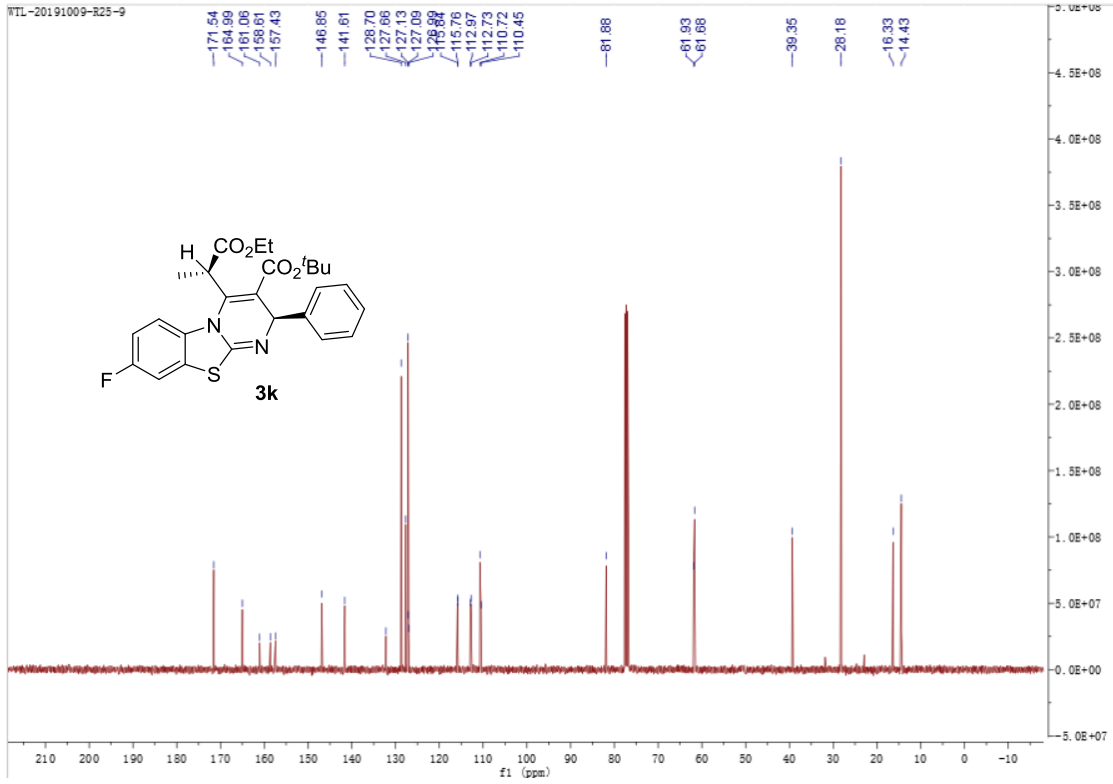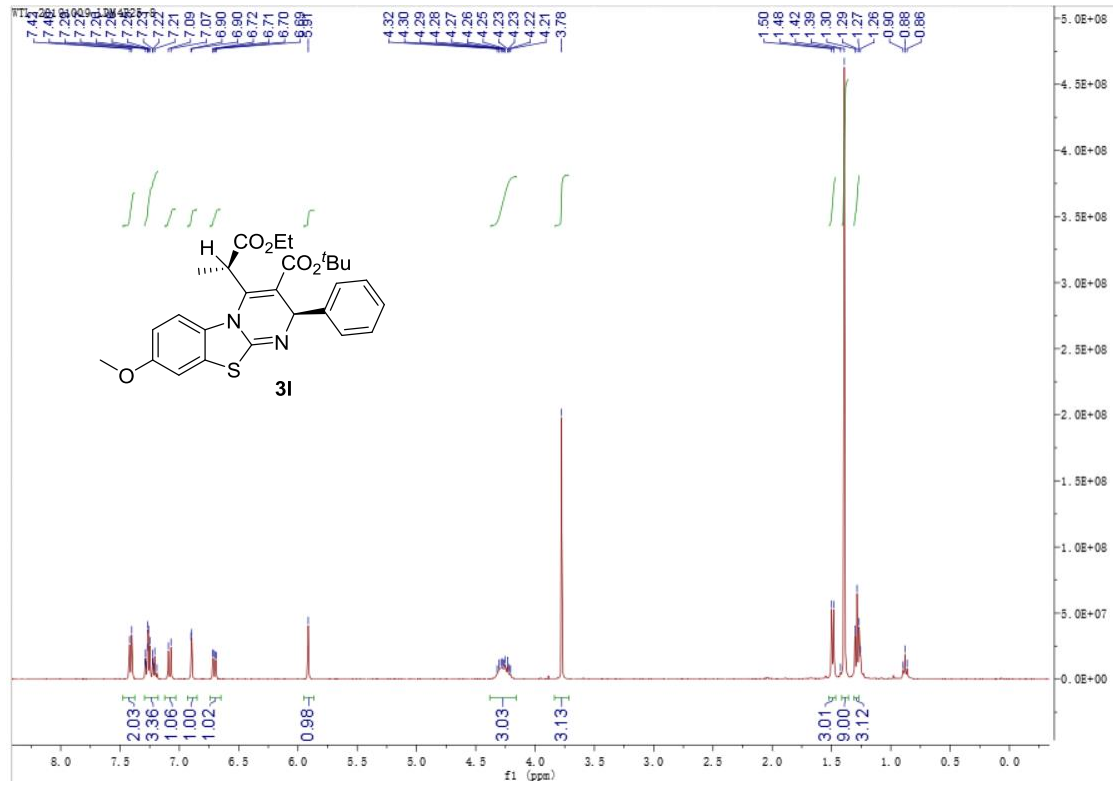

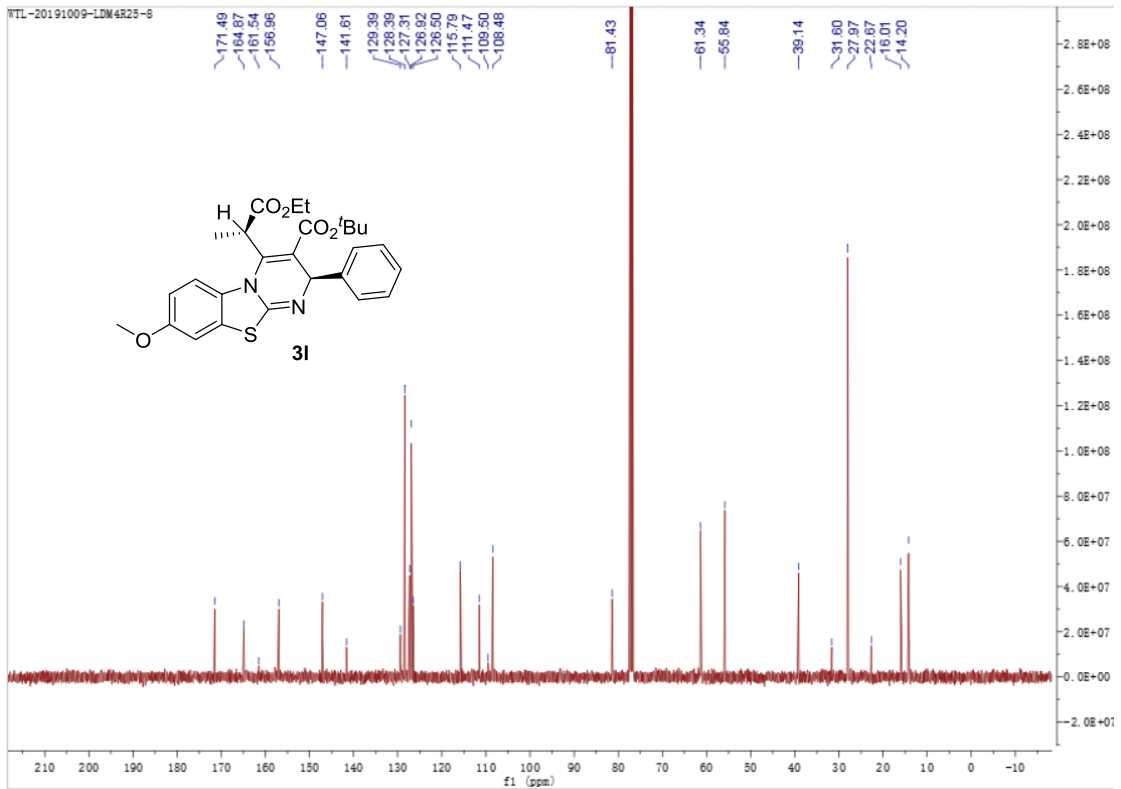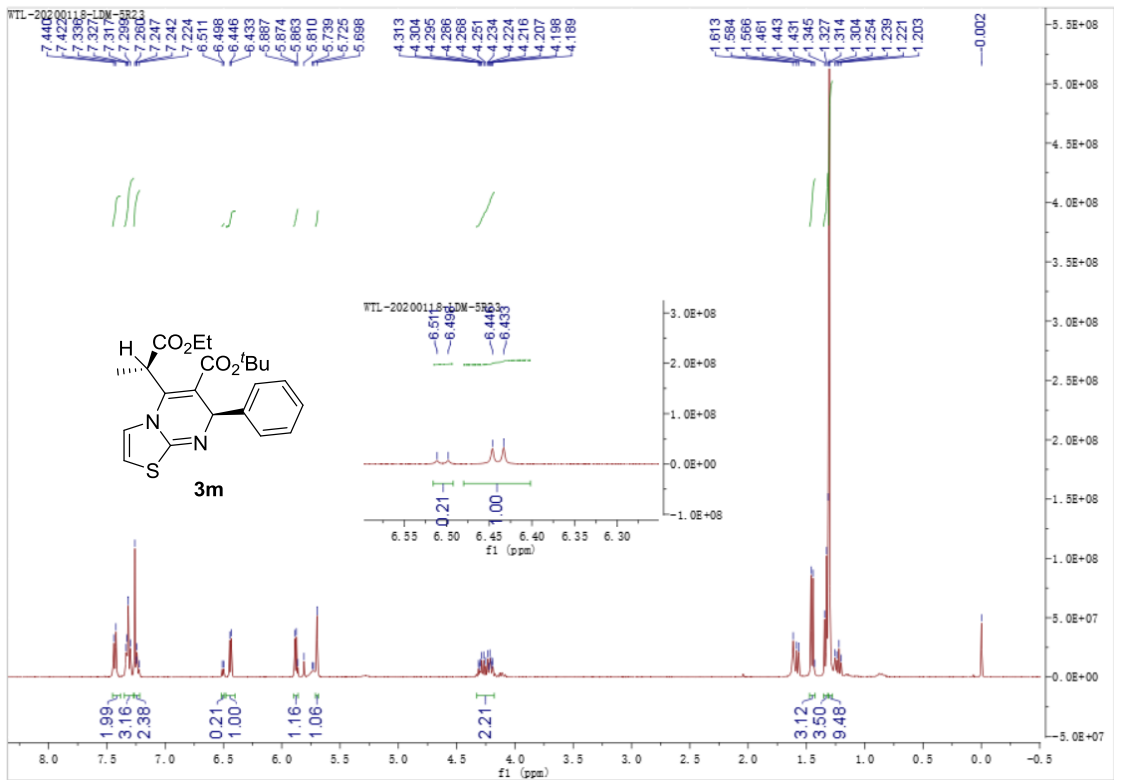

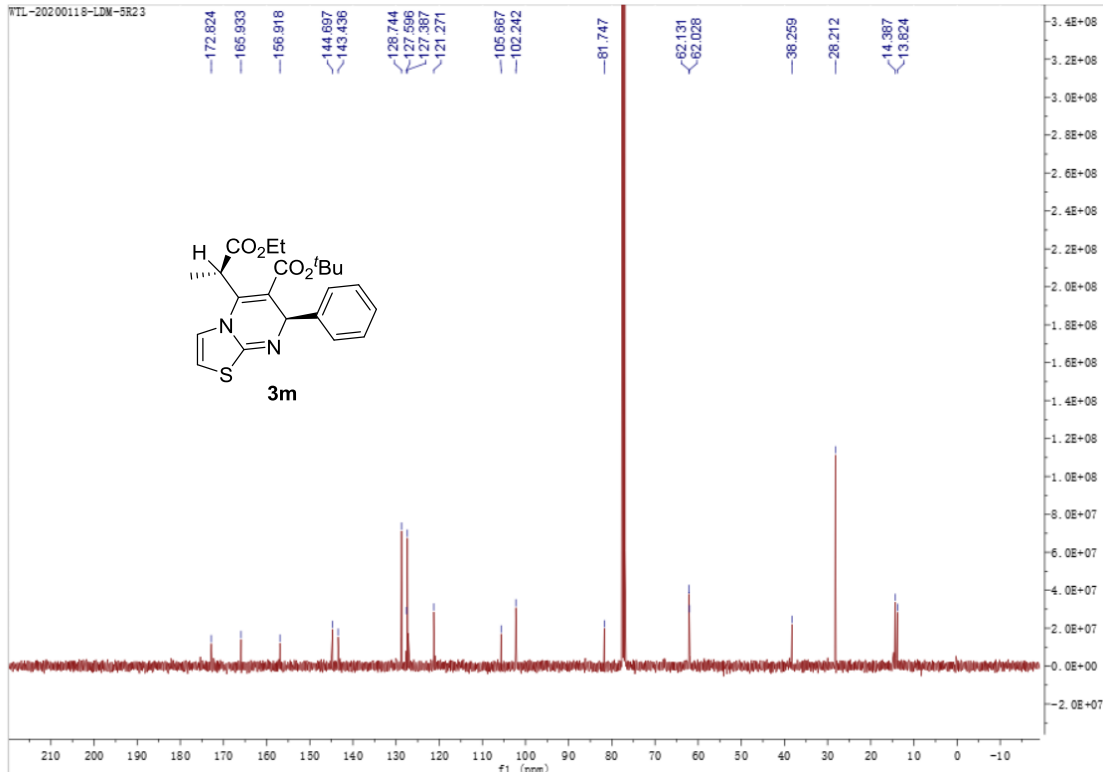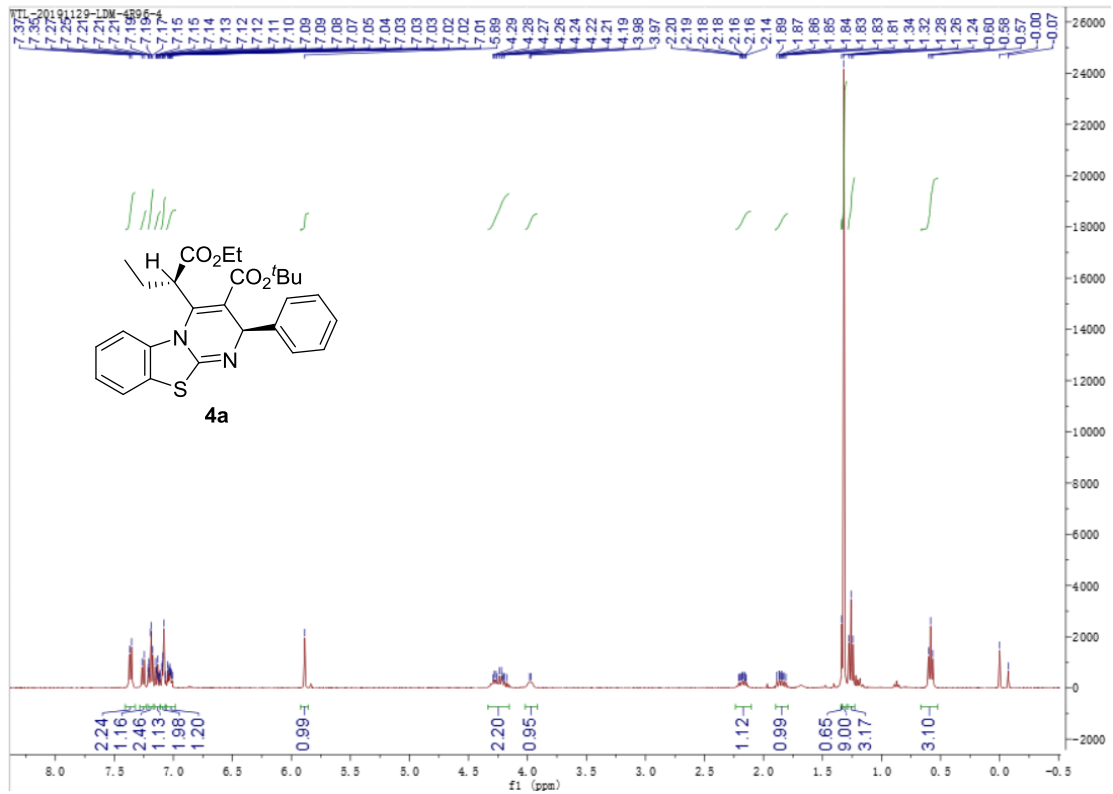

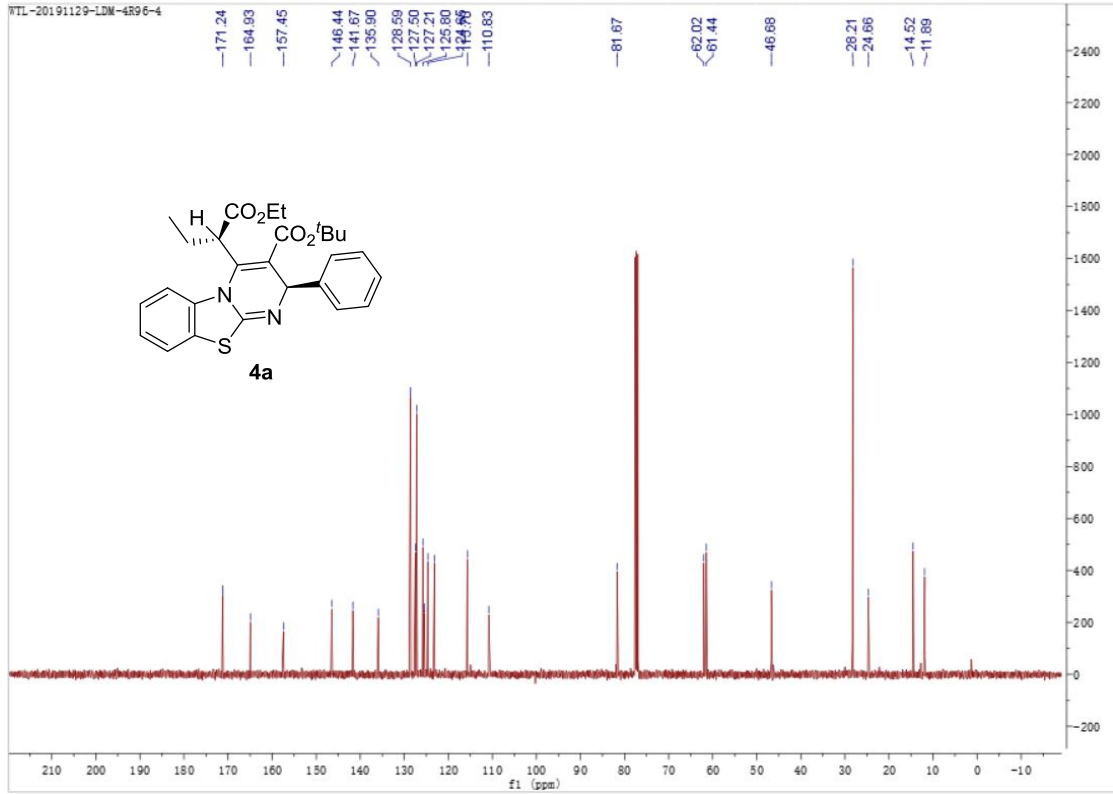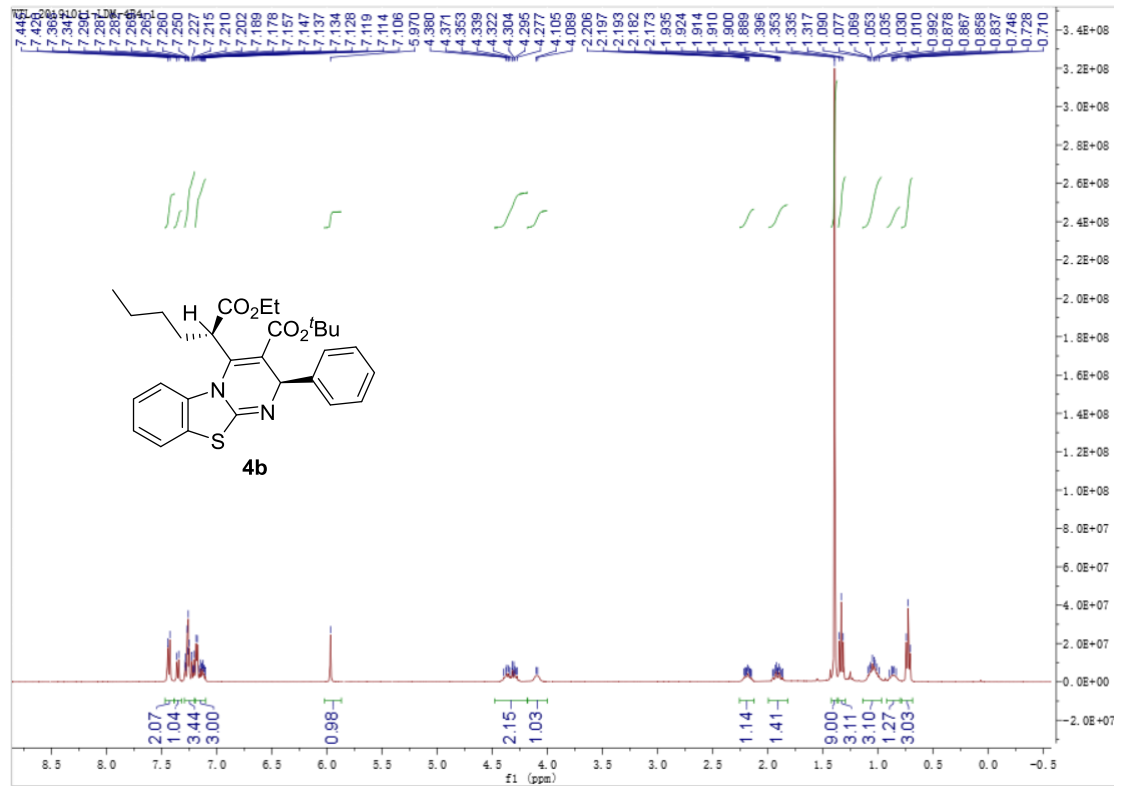

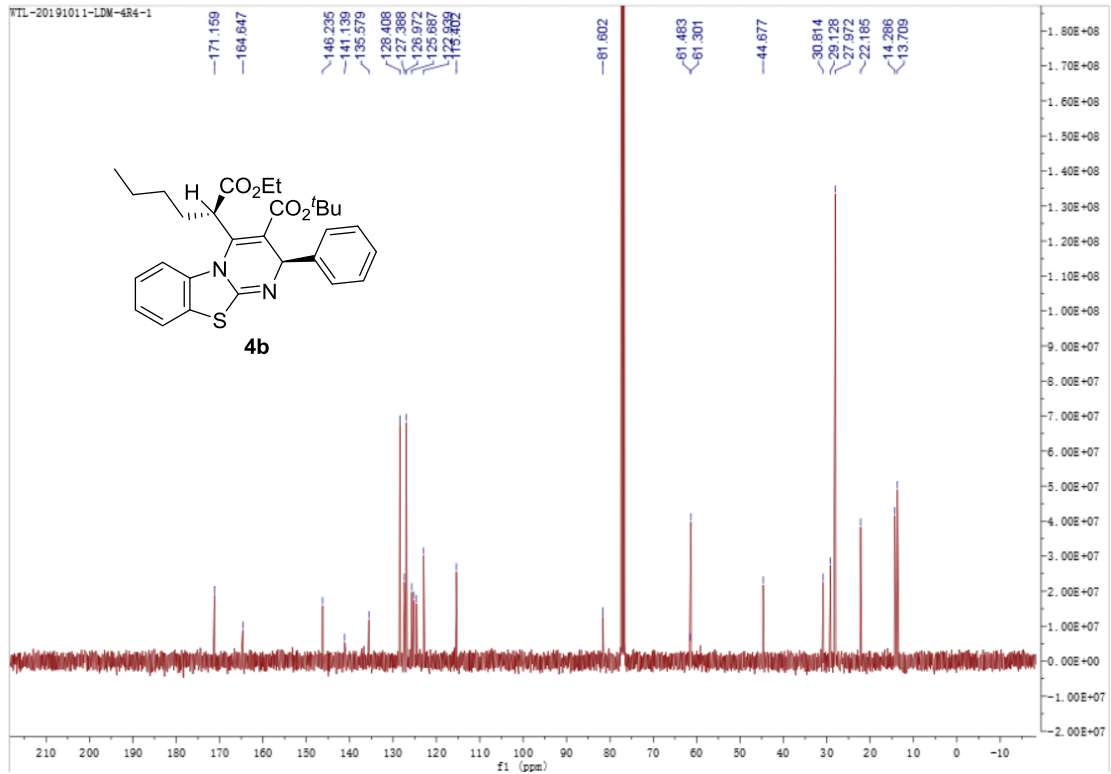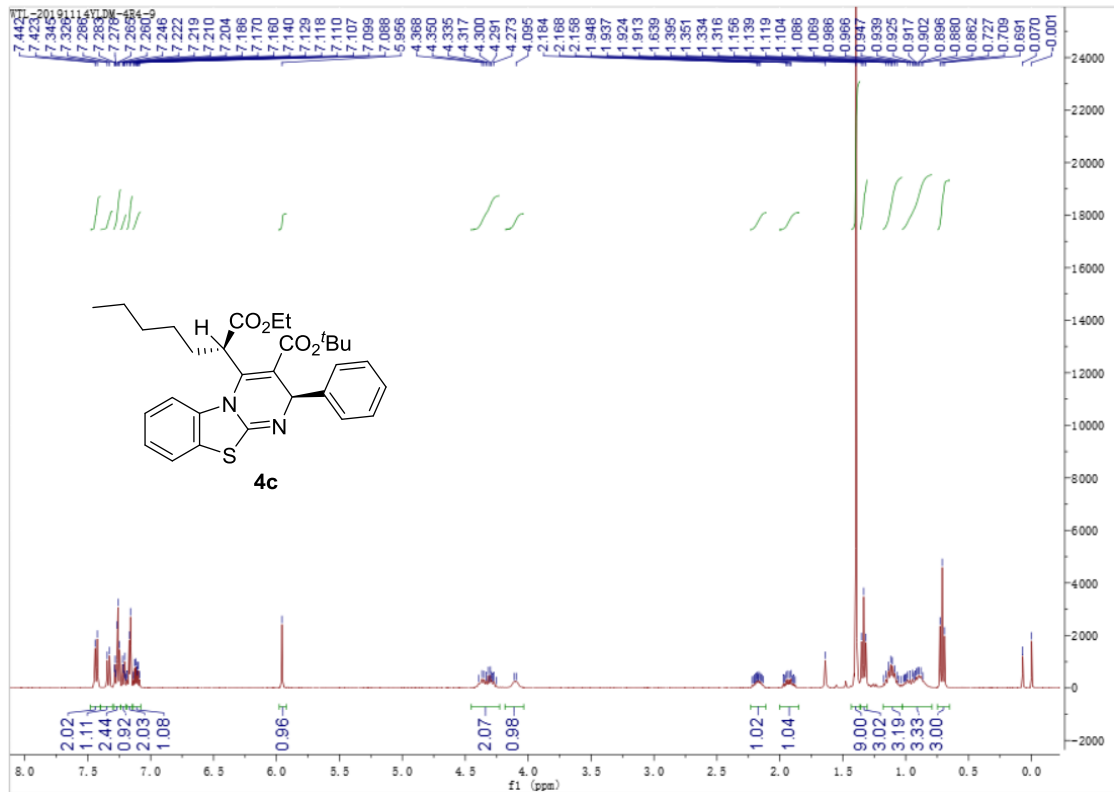

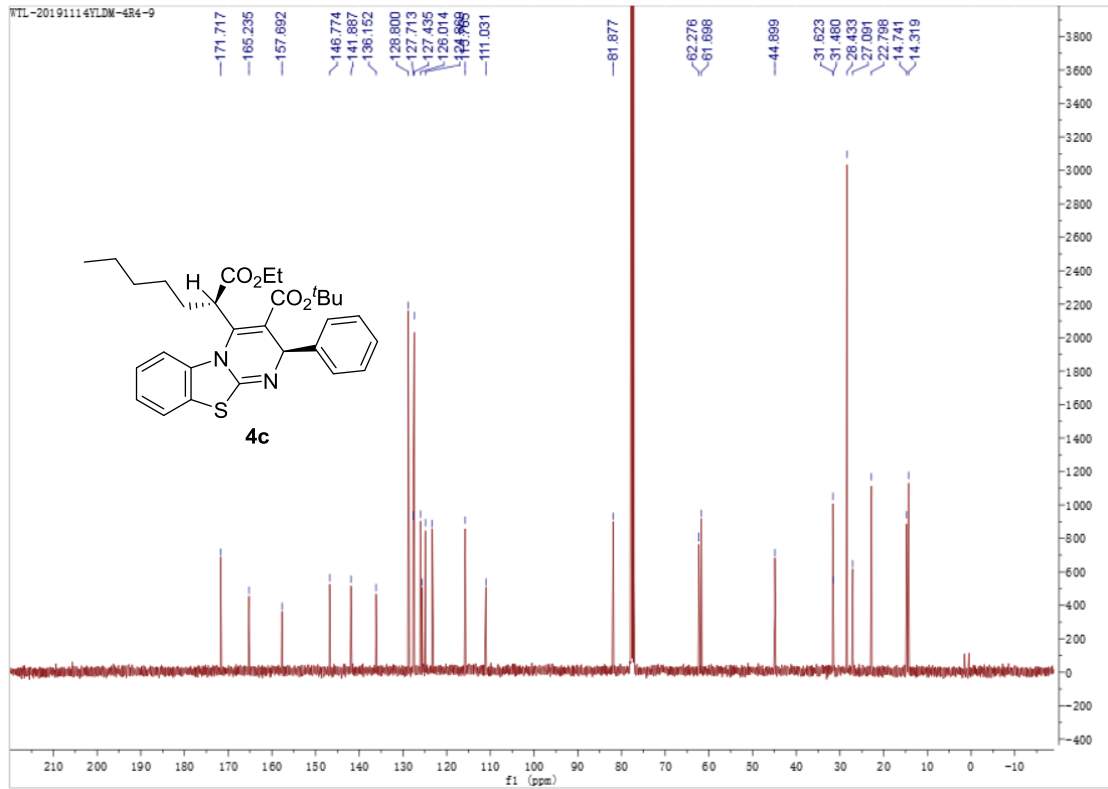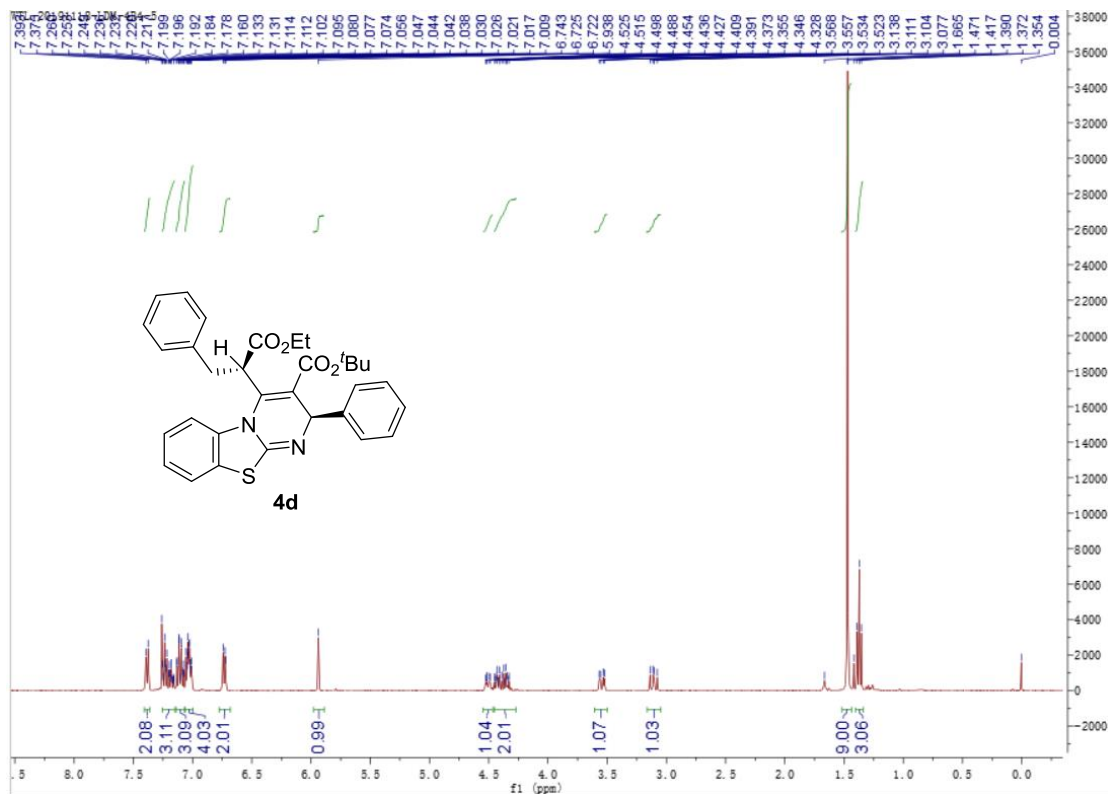

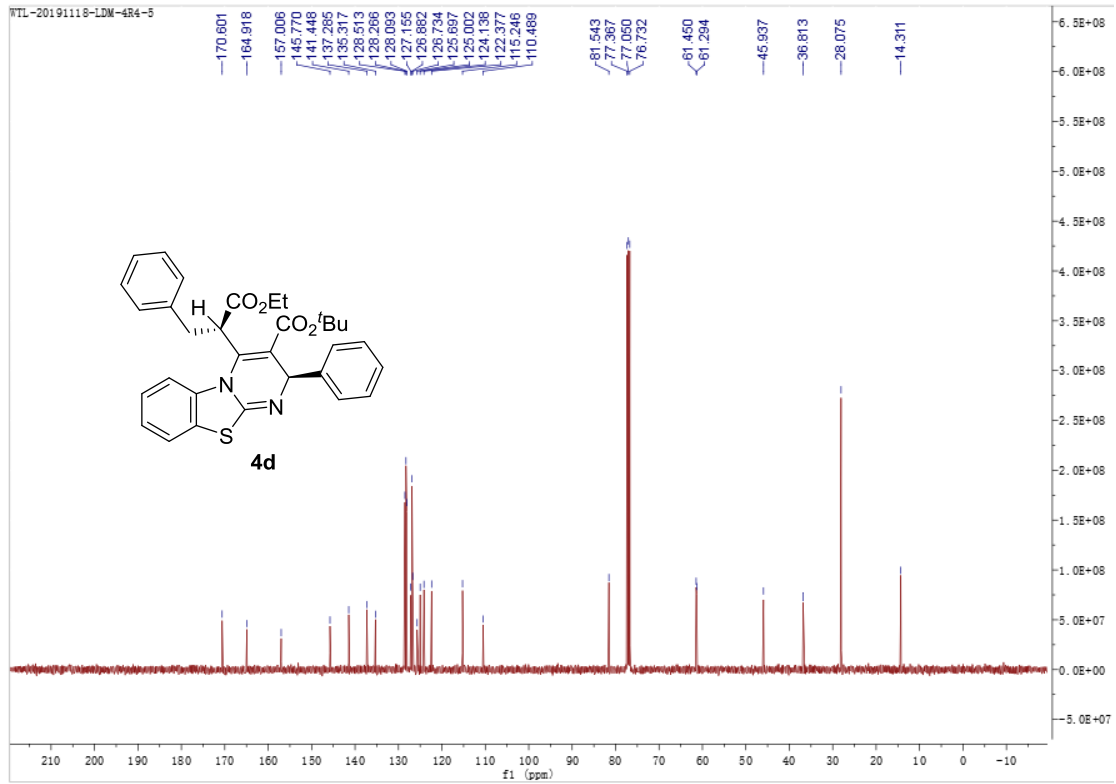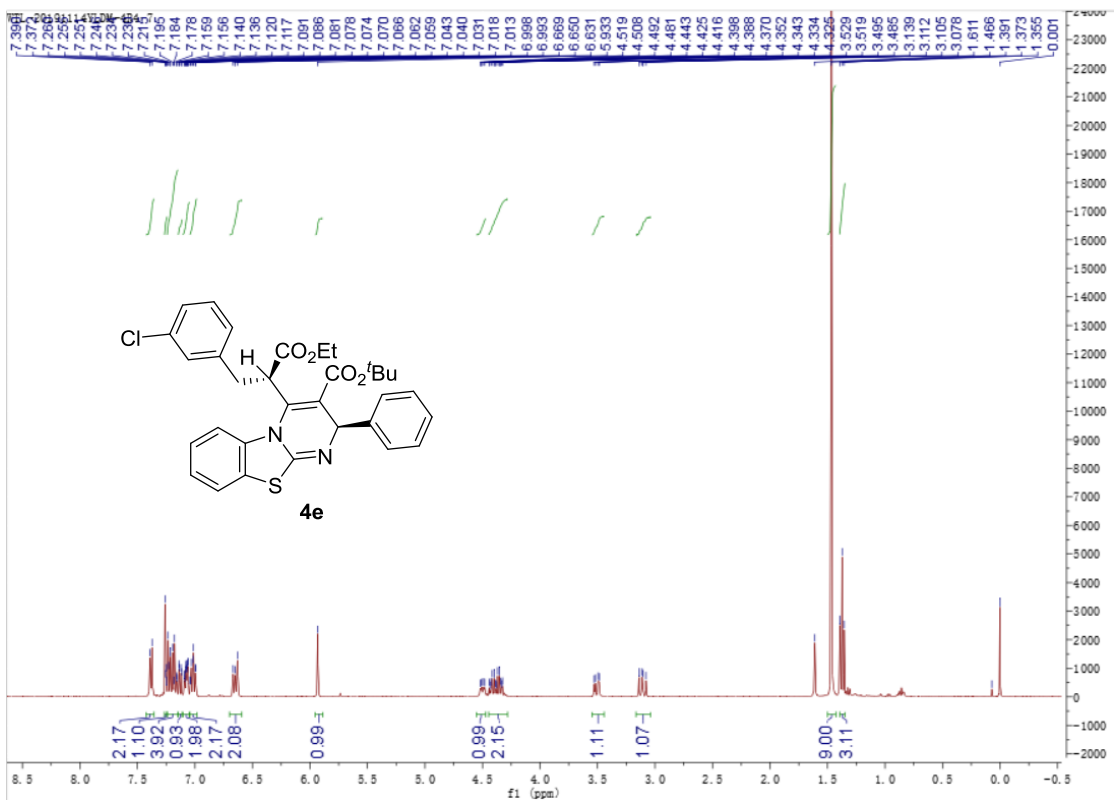



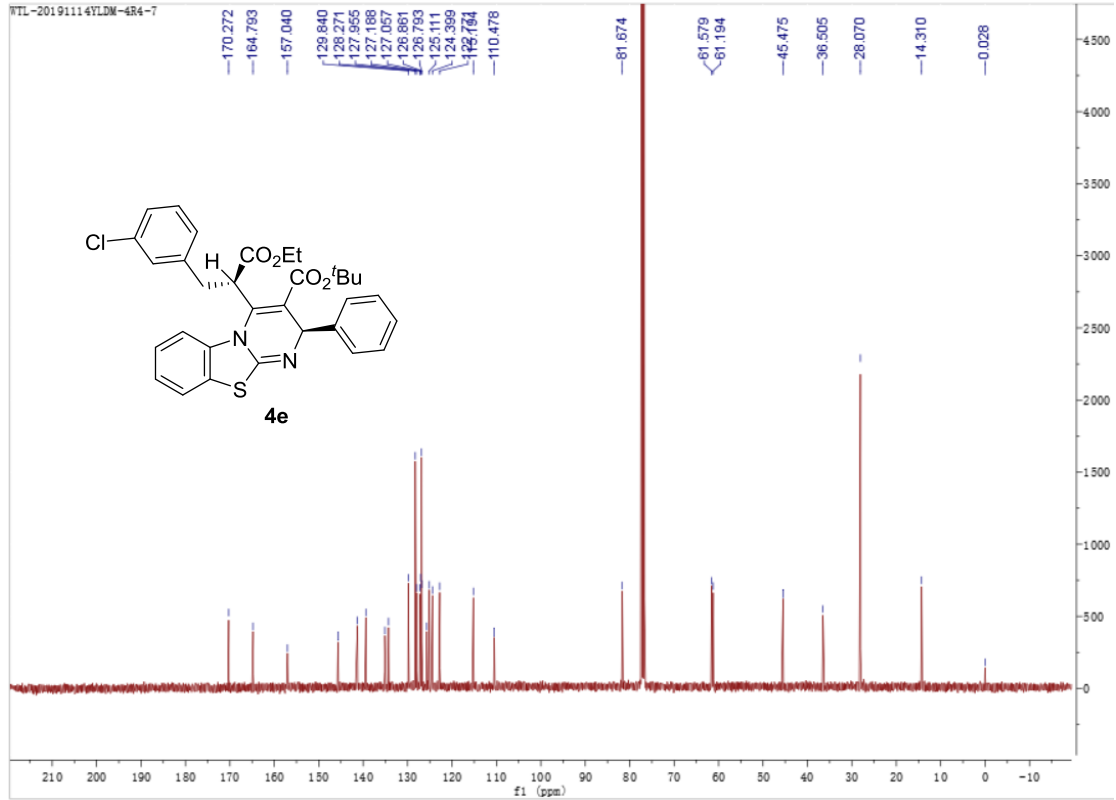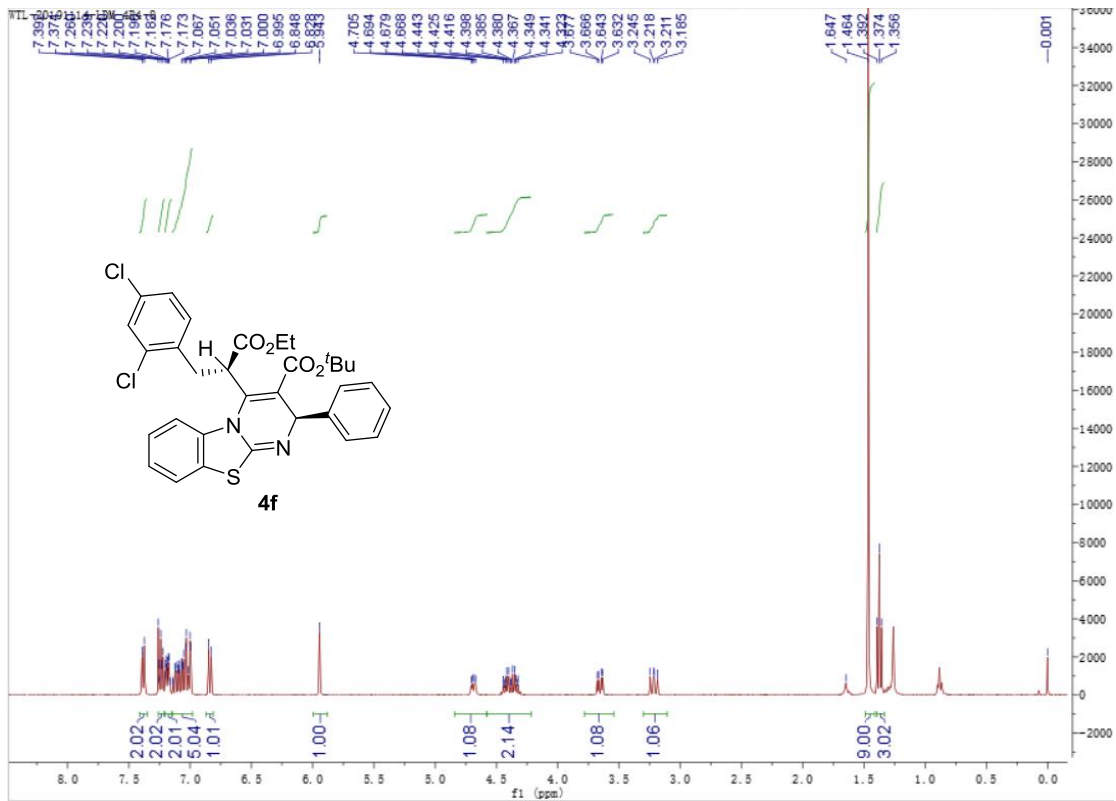

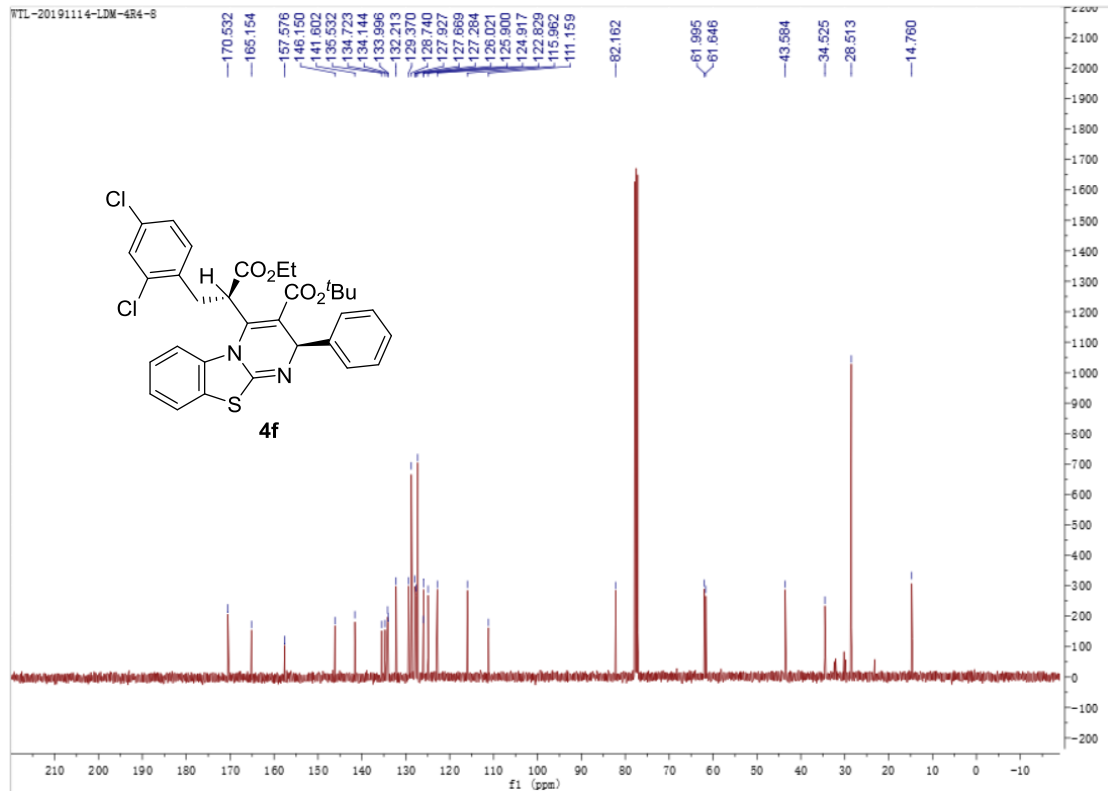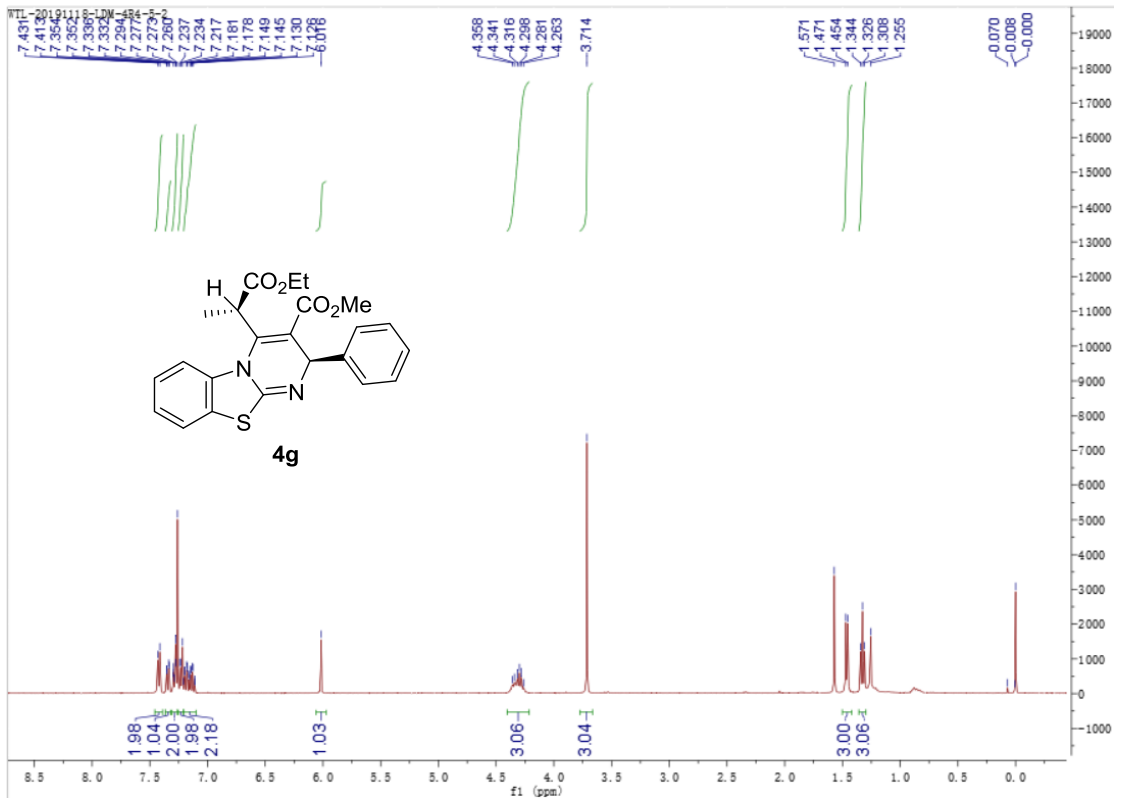

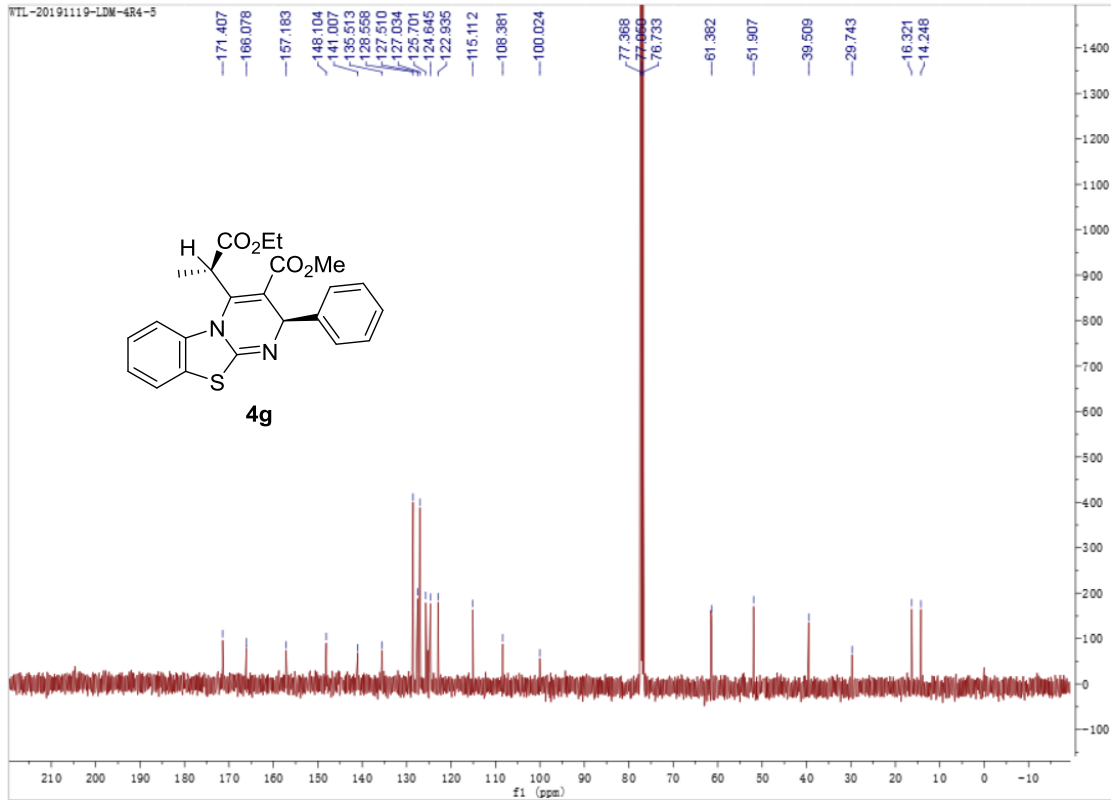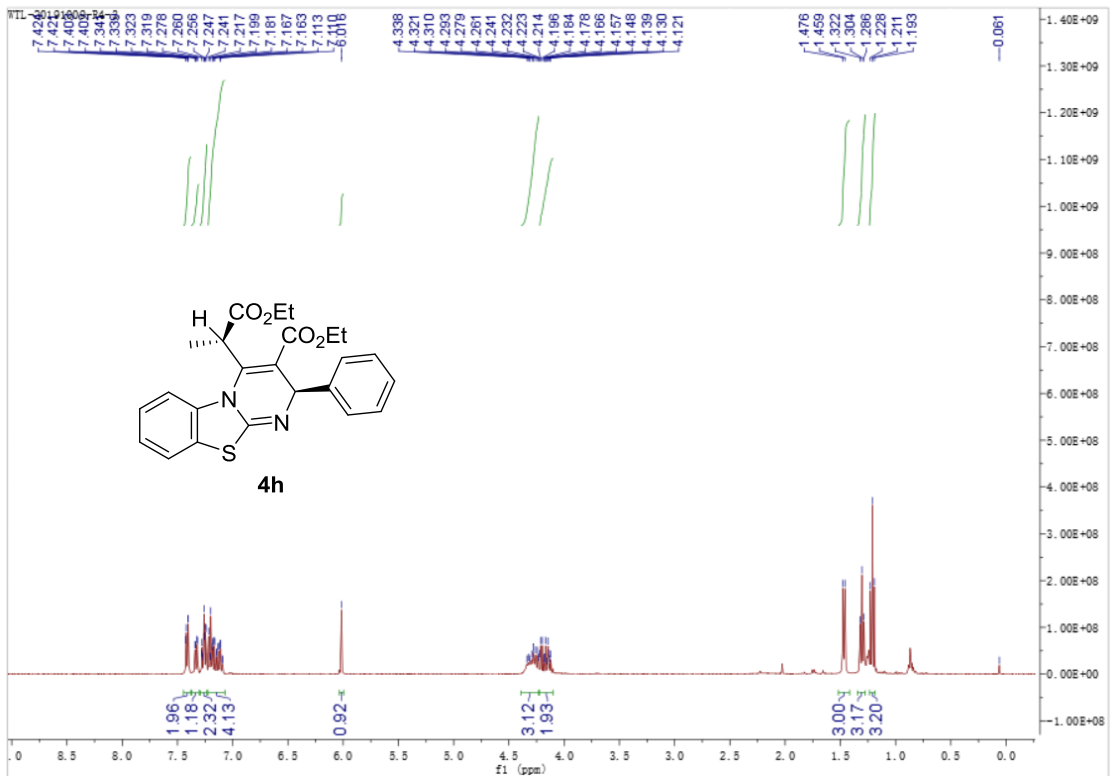

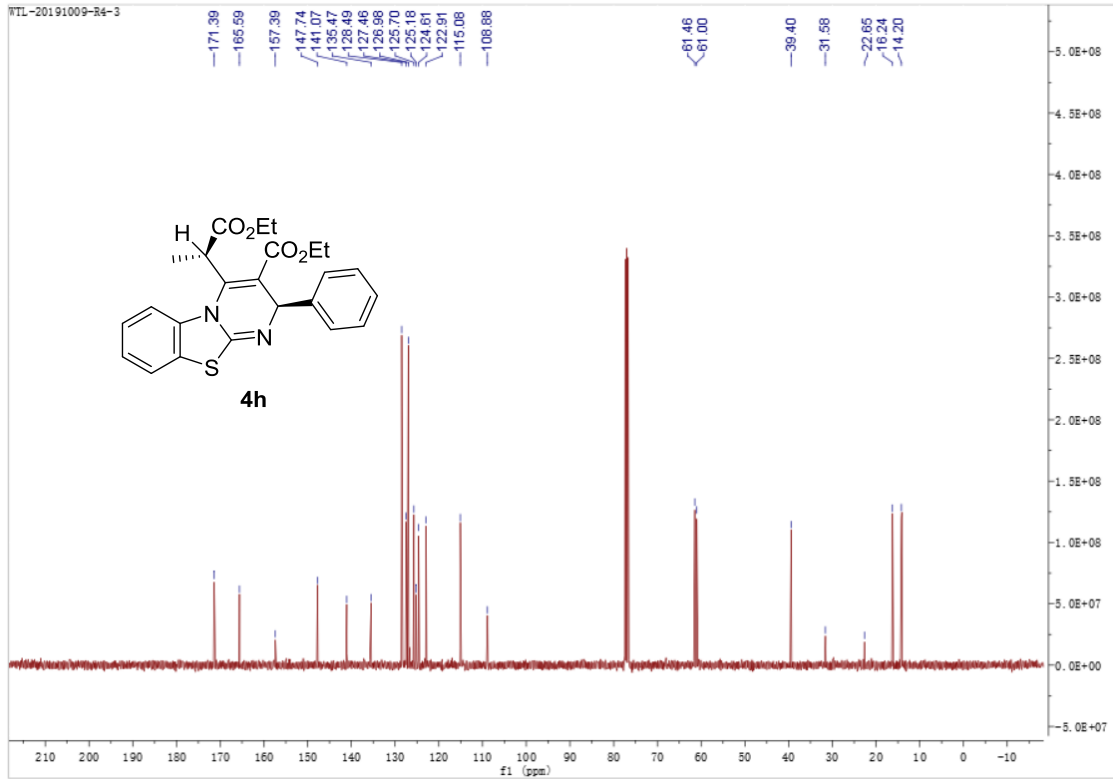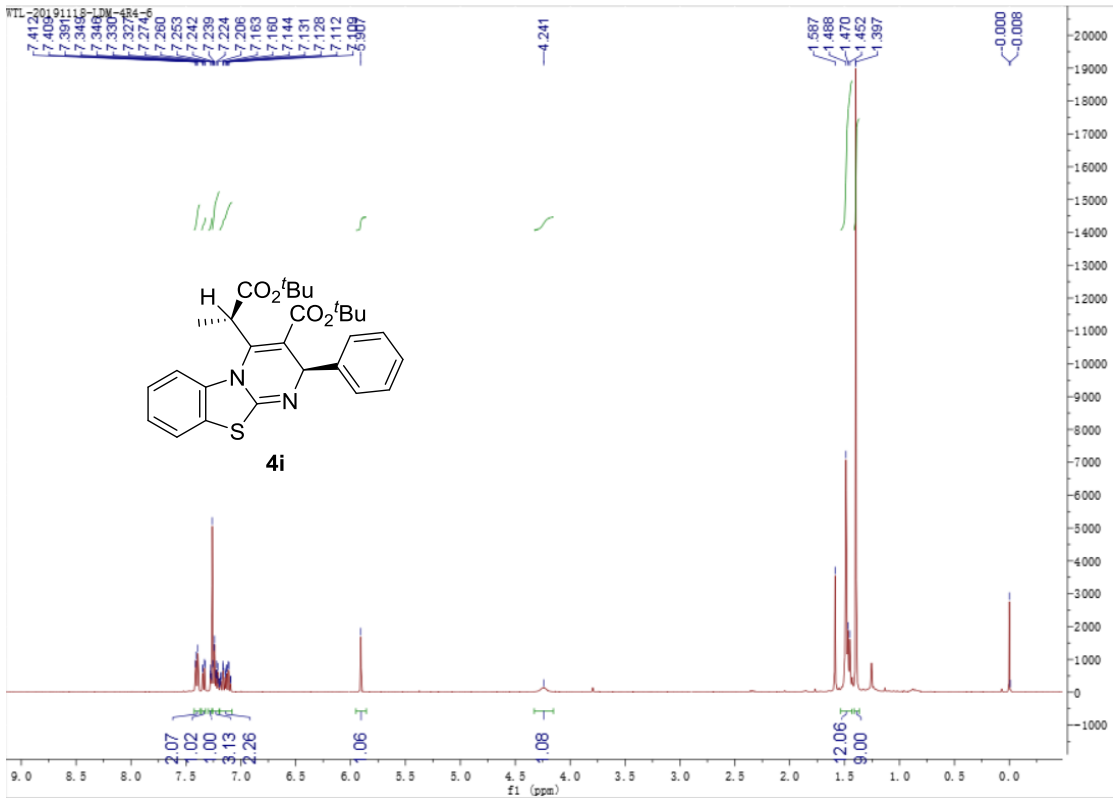

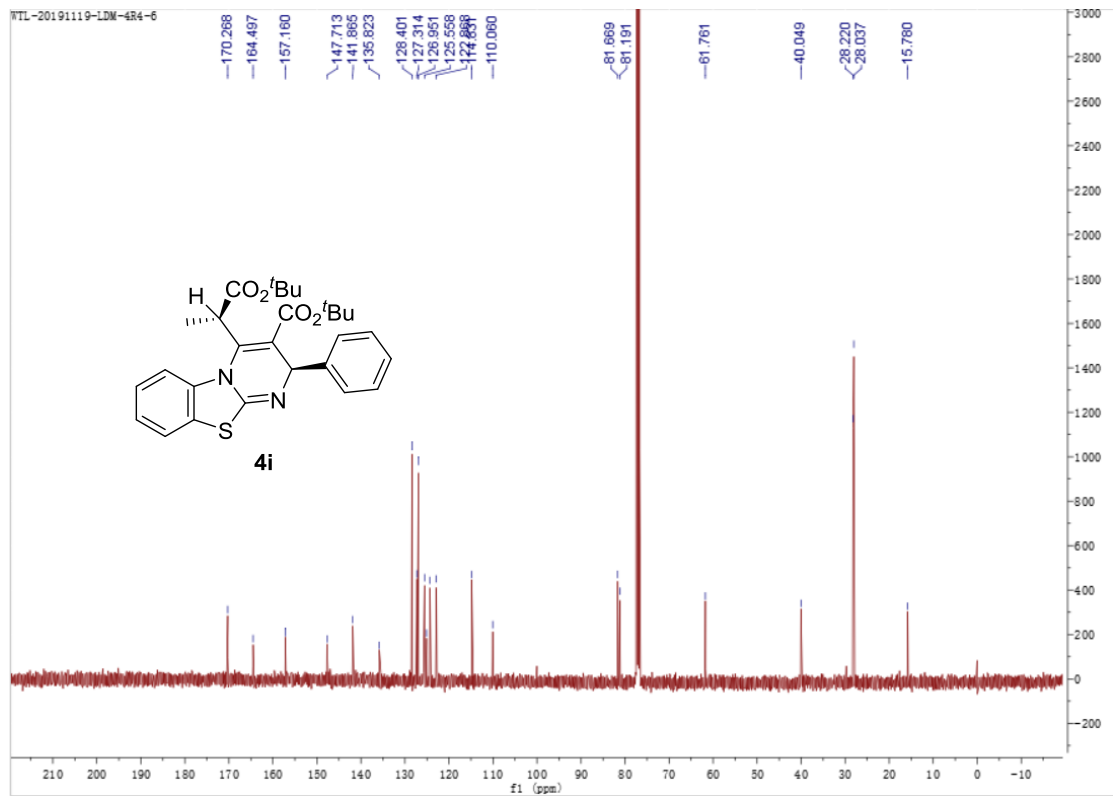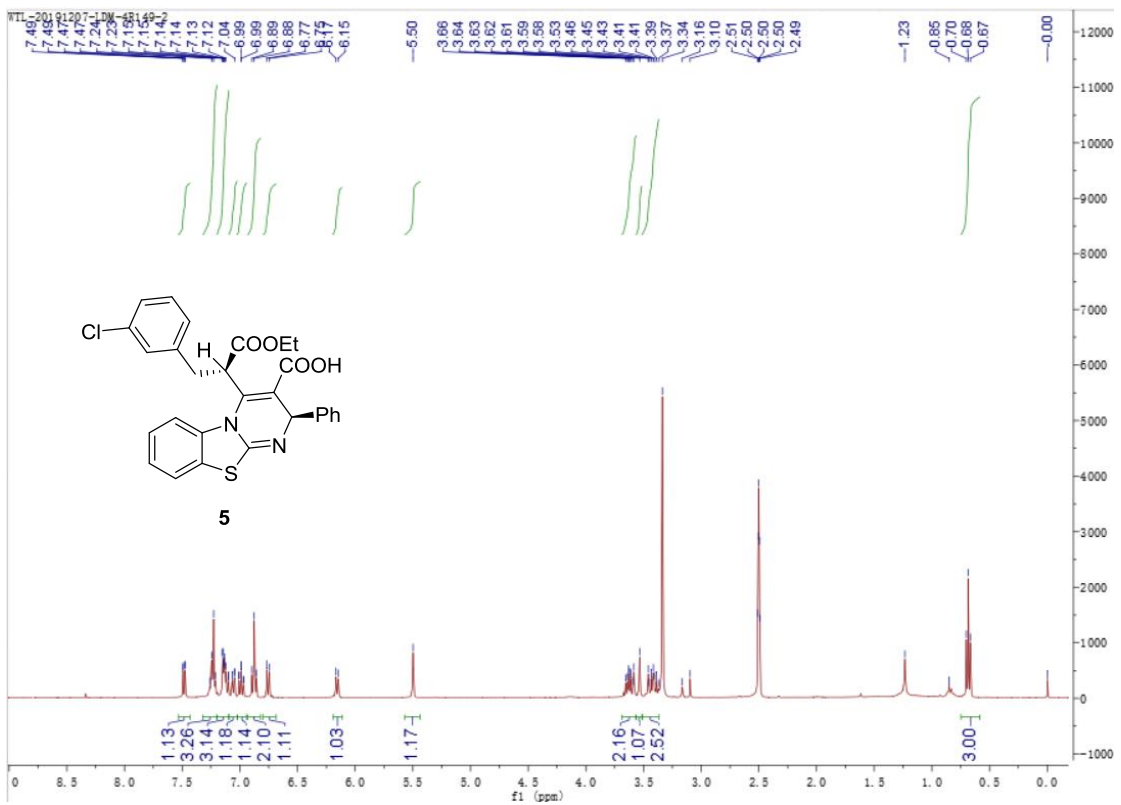

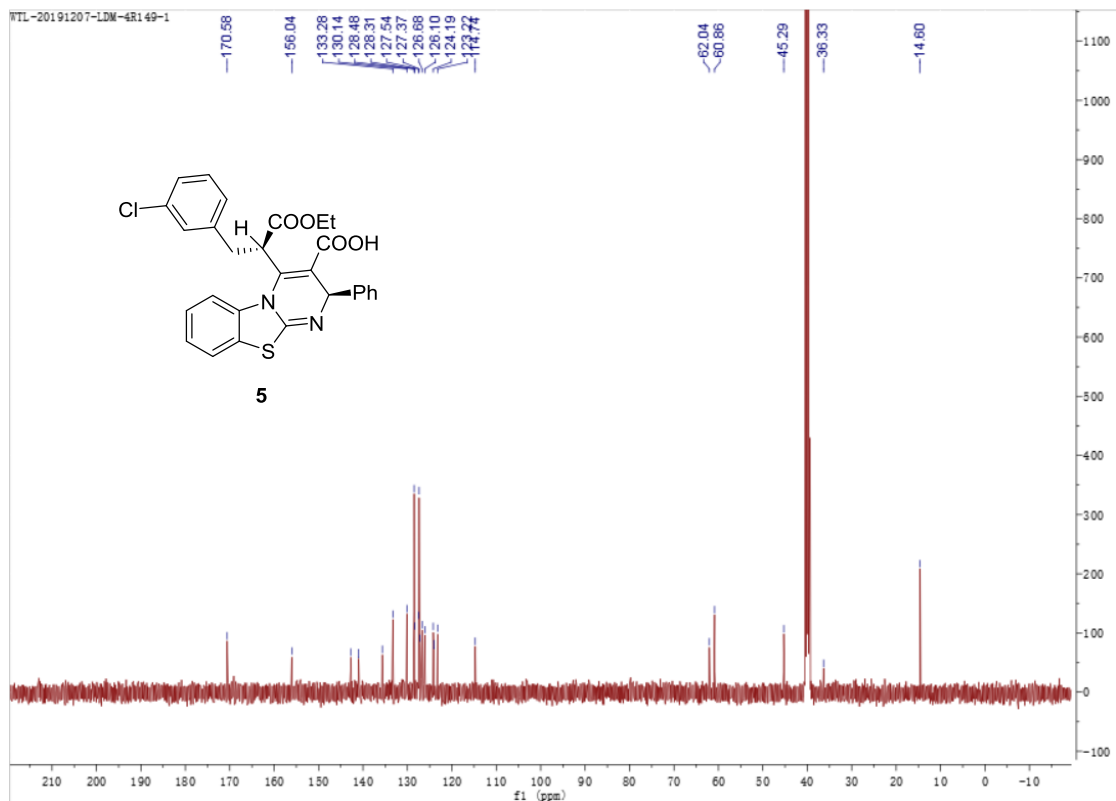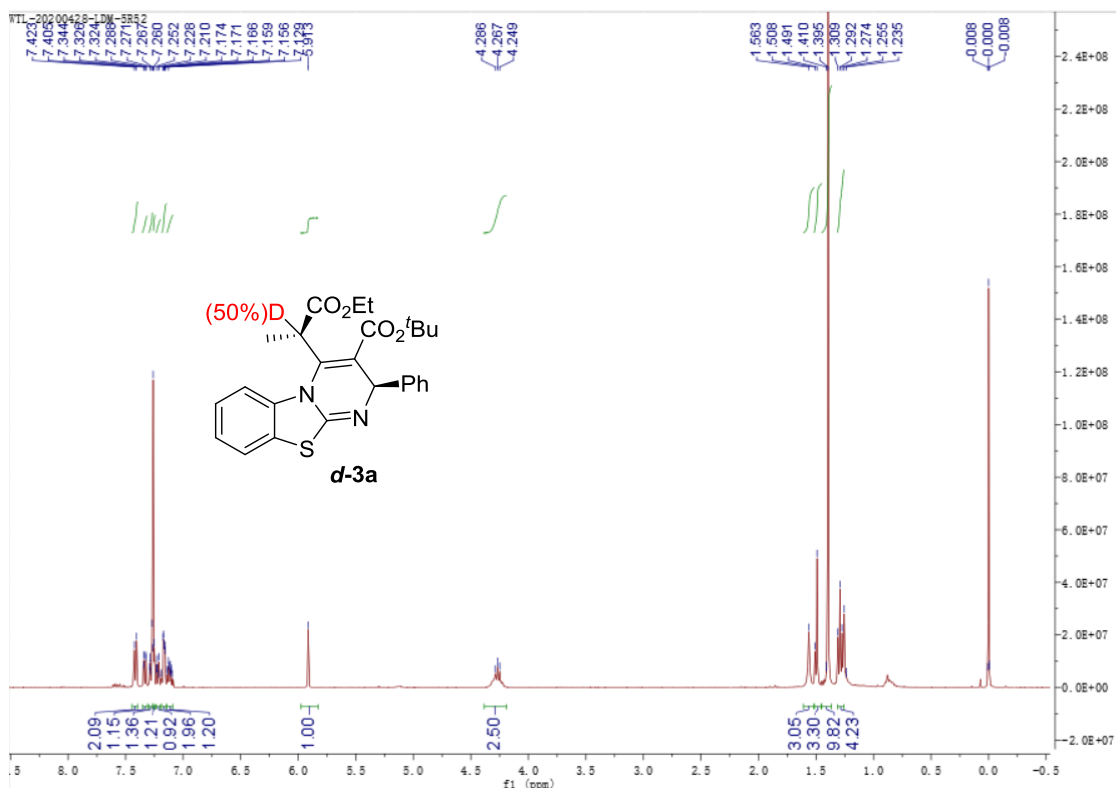

Supplement: d0cc04820h1.pdf [file d0cc04820h1.pdf]
